# Supplementary material for: NH4PF6-promoted cyclodehydration of α-amino carbonyl compounds: efficient synthesis of pyrrolo[3,2,1-ij]quinoline and indole derivatives
Source: Royal Society of Chemistry journal article supplement (doi:10.1039/c4ra11168k), 2014-01-01

# **NH<sub>4</sub>PF<sub>6</sub>-Promoted Cyclodehydration of $\alpha$ -Amino Carbonyl Compounds: Efficient Synthesis of Pyrrolo[3,2,1-*ij*]quinoline and Indole derivatives**

Xiao-Ming Ji, Shu-Juan Zhou, Chen-Liang Deng, Fan Chen\* and Ri-Yuan Tang\*

*College of Chemistry and Materials engineering, Wenzhou University, Wenzhou, 325035, China*

[try@wzu.edu.cn](mailto:try@wzu.edu.cn), [fanchen@wzu.edu.cn](mailto:fanchen@wzu.edu.cn)

## **Supporting Information**

### **List of Contents**

|                                                                             |                |
|-----------------------------------------------------------------------------|----------------|
| <b>1. General information</b>                                               | <b>S2</b>      |
| <b>2. Evaluating Lewis acid and Bronsted acids for the reaction</b>         | <b>S2</b>      |
| <b>3. General Experimental Procedure</b>                                    | <b>S2</b>      |
| <b>4. Analytical data for compounds 1i, 1l, 1q, 3m, 2a – 2q and 4a – 4o</b> | <b>S2-S12</b>  |
| <b>5. References</b>                                                        | <b>S12</b>     |
| <b>6. NMR Spectra for compounds 1i, 1l, 1q, 2a – 2q, 3m and 4a – 4o</b>     | <b>S13-S48</b> |

## 1. General information

$^1\text{H}$  and  $^{13}\text{C}$  NMR spectra were measured on a Bruker Avance-III 500 instrument (500 MHz for  $^1\text{H}$ , 125 MHz for  $^{13}\text{C}$  NMR spectroscopy) using  $\text{CDCl}_3$  as the solvent. Chemical shifts for  $^1\text{H}$  and  $^{13}\text{C}$  NMR were referred to internal  $\text{Me}_4\text{Si}$  (0 ppm) as the standard. Mass spectra were measured on a Shimadzu GC-MS-QP2010 Plus spectrometer (EI). HRMS (ESI) analysis was measured on a Bruker micrOTOF-Q II instrument. The following abbreviations (or combinations thereof) were used to explain multiplicities: s = singlet, d = doublet, t = triplet, q = quartet, m = multiplet.

## 2. Evaluating Lewis acid and Bronsted acids for the reaction <sup>a</sup>

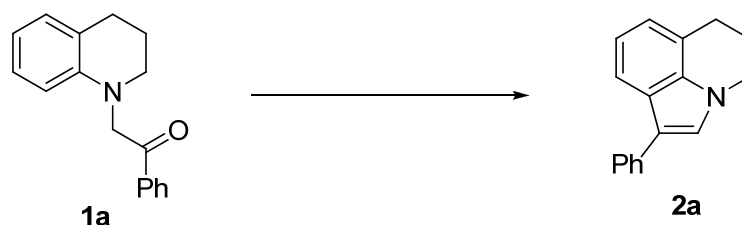

| entry          | Additive (equiv)             | Solvent                | Yield (%) <sup>b</sup> |
|----------------|------------------------------|------------------------|------------------------|
| 1              | $\text{FeCl}_3$ (0.5)        | HFIP                   | 8                      |
| 2              | $\text{ZnCl}_2$ (0.5)        | HFIP                   | 8                      |
| 3              | $\text{AlCl}_3$ (0.5)        | HFIP                   | 12                     |
| 4              | $\text{AgOTf}$ (0.5)         | HFIP                   | 10                     |
| 5 <sup>c</sup> | $\text{H}_2\text{SO}_4$ (2)  | HFIP                   | 22                     |
| 6 <sup>d</sup> | HCl (2)                      | HFIP                   | 47                     |
| 7 <sup>e</sup> | $\text{HPF}_6$ (2)           | HFIP                   | 33                     |
| 8              | AcOH (2)                     | HFIP                   | trace                  |
| 9              | TsOH (2)                     | HFIP                   | 12                     |
| 10             | TsOH (2)                     | $\text{CH}_3\text{CN}$ | 16                     |
| 11             | $\text{CF}_3\text{COOH}$ (2) | HFIP                   | 32                     |
| 12             | $\text{CF}_3\text{COOH}$ (2) | $\text{CH}_3\text{CN}$ | 0                      |

<sup>a</sup> Reaction conditions: **1a** (0.2 mmol), additive (0.5 – 2 equiv) in solvent (2 mL) at 110 °C for 24 h. <sup>b</sup> Isolated yields. <sup>c</sup>  $\text{H}_2\text{SO}_4$  (98%). <sup>d</sup> HCl (36%). <sup>e</sup>  $\text{HPF}_6$  (60% in water).

## 3. General Experimental Procedure

### General procedure for $\text{NH}_4\text{PF}_6$ -promoted synthesis of pyrrolo[3,2,1-*ij*]quinolines and indoles:

A 15-mL tube with a Teflon cap, equipped with a magnetic stirring bar, was charged with substrate (0.20 mmol) and  $\text{NH}_4\text{PF}_6$  (65.2 mg, 0.40 mmol, 2.0 equiv), and then HFIP (2 mL) was added. The tube was then capped and submerged in a preheated oil bath at 110 °C. The reaction mixture was stirred for 24 h and cooled to room temperature. The crude reaction mixture was diluted with AcOEt, filtered through a Celite pad, and washed with AcOEt. The filtrate was concentrated *in vacuo*, and the resulting residue was purified by column chromatography, using hexane/EtOAc as the eluent.

## 4. Analytical data for the following compounds **1i**, **1l**, **1q**, **2a – 2n**, **3m** and **4a – 4n**:

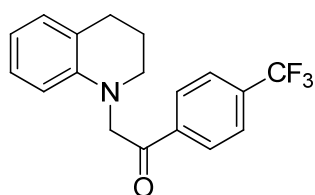

**2-(3,4-dihydroquinolin-1(2H)-yl)-1-(4-(trifluoromethyl)phenyl)ethanone (1i)**. Yellow solid. M.P.: 128.6 – 129.3 °C.  $^1\text{H}$  NMR (500 MHz,  $\text{CDCl}_3$ )  $\delta$  8.09 (d,  $J = 8.0$  Hz, 2H), 7.78 (d,  $J = 8.0$  Hz, 2H), 6.99 – 6.95 (m, 2H), 6.64 (t,  $J = 7.5$  Hz, 1H), 6.30 (d,  $J = 8.5$  Hz, 1H), 4.71 (s, 2H), 3.39 (t,  $J = 6.0$  Hz, 2H), 2.83 (t,  $J = 6.5$  Hz, 2H), 2.09 – 1.98 (m, 2H).  $^{13}\text{C}$  NMR (125 MHz,  $\text{CDCl}_3$ )  $\delta$  196.1, 144.8,

138.2, 134.8 (q,  $J_{C-F} = 32.6\text{Hz}$ ), 129.3, 128.2, 127.1, 125.9 (q,  $J_{C-F} = 3.6\text{Hz}$ ), 123.5 (d,  $J_{C-F} = 271.3\text{Hz}$ ), 123.0, 117.0, 110.2, 58.1, 50.6, 27.9, 22.3. LRMS (EI, 70 eV)  $m/z$  (%): 319 (16), 301 (11), 146 (100), 130 (11), 118 (9). HRMS (ESI) for  $C_{18}H_{17}F_3NO$  ( $M+H$ )<sup>+</sup>: calcd 320.1257, found 320.1270.

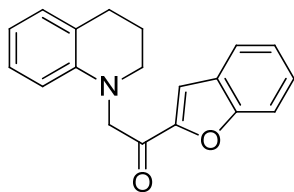

**1-(benzofuran-2-yl)-2-(3,4-dihydroquinolin-1(2H)-yl)ethanone (1l).** Yellow solid. M.P.: 115.1 – 116.3°C. <sup>1</sup>H NMR (500 MHz, CDCl<sub>3</sub>) δ 7.72 – 7.70 (m, 1H), 7.60 – 7.58 (m, 2H), 7.51 – 7.48 (m, 1H), 7.34 – 7.31 (m, 1H), 6.99 – 6.96 (m, 2H), 6.63 – 6.60 (m, 1H), 6.42 (d,  $J = 8.5$  Hz, 1H), 4.65 (s, 2H), 3.44 (t,  $J = 6.0$  Hz, 2H), 2.83 (t,  $J = 6.4$  Hz, 2H), 2.06 – 2.02 (m, 3H). <sup>13</sup>C NMR (125 MHz, CDCl<sub>3</sub>) δ 188.8, 155.5, 151.5, 145.0, 129.3, 128.5, 127.1, 126.9, 124.1, 123.5, 122.9, 116.9, 112.9, 112.5, 110.7, 58.2, 50.9, 28.0, 22.3. LRMS (EI, 70 eV)  $m/z$  (%): 291 (3), 273 (100), 244 (7), 189 (3), 136 (6). HRMS (ESI) for  $C_{19}H_{18}NO_2$  ( $M+H$ )<sup>+</sup>: calcd 292.1332, found 292.1326.

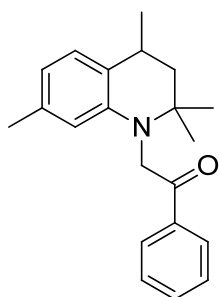

**1-phenyl-2-(2,2,4,7-tetramethyl-3,4-dihydroquinolin-1(2H)-yl)ethanone (1q).** Yellow solid. M.P.: 88.2–89.1°C. <sup>1</sup>H NMR (500 MHz, CDCl<sub>3</sub>) δ 8.07 – 8.05 (m, 2H), 7.62 (t,  $J = 7.4$  Hz, 1H), 7.53 – 7.49 (m, 2H), 7.05 (d,  $J = 7.7$  Hz, 1H), 6.45 (d,  $J = 7.6$  Hz, 1H), 5.91 (s, 1H), 4.84 (d,  $J = 18.7$  Hz, 1H), 4.57 (d,  $J = 18.7$  Hz, 1H), 3.01 – 2.93 (m, 1H), 2.13 (s, 3H), 1.77 – 1.75 (m, 2H), 1.34 (d,  $J = 6.6$  Hz, 3H), 1.24 (d,  $J = 9.0$  Hz, 6H). <sup>13</sup>C NMR (125 MHz, CDCl<sub>3</sub>) δ 196.9, 144.5, 136.4, 135.8, 133.3, 128.8, 127.8, 125.9, 124.6, 116.9, 111.9, 54.3, 52.3, 46.6, 29.7, 27.0, 25.2, 21.6, 20.1. LRMS (EI, 70 eV)  $m/z$  (%): 307 (3), 289 (22), 202 (100), 93 (15), 77 (10). HRMS (ESI) for  $C_{21}H_{26}NO$  ( $M+H$ )<sup>+</sup>: calcd 308.2009, found 308.2015.

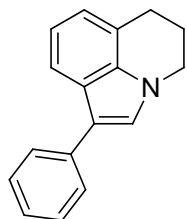

**1-phenyl-5,6-dihydro-4H-pyrrolo[3,2,1-ij]quinoline (2a).** Yellow solid. 95% yield (44.3 mg). M.P.: 63.3 – 64.2°C. <sup>1</sup>H NMR (500 MHz, CDCl<sub>3</sub>) δ 7.76 (d,  $J = 8.0$  Hz, 1H), 7.69 – 7.67 (m, 2H), 7.43 – 7.40 (m, 2H), 7.27 – 7.22 (m, 2H), 7.10 – 7.08 (m, 1H), 6.96 (d,  $J = 7.0$  Hz, 1H), 4.18 (t,  $J = 6.0$  Hz, 2H), 3.01 (t,  $J = 6.1$  Hz, 2H), 2.28 – 2.23 (m, 2H). <sup>13</sup>C NMR (125 MHz, CDCl<sub>3</sub>) δ 136.2, 135.0, 128.8, 126.9, 125.5, 123.8, 123.7, 122.1, 120.4, 119.0, 117.6, 116.6, 44.2, 24.8, 22.8. LRMS (EI, 70 eV)  $m/z$  (%): 233 (100), 232 (33), 204 (6), 154 (5), 88 (2). HRMS (ESI) for  $C_{17}H_{16}N$  ( $M+H$ )<sup>+</sup>: calcd 234.1277, found 234.1282.

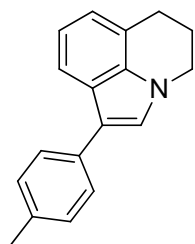

**1-(p-tolyl)-5,6-dihydro-4H-pyrrolo[3,2,1-ij]quinoline (2b).** Yellow solid. 92% yield (45.6 mg). M.P.: 103.2 – 104.0°C. <sup>1</sup>H NMR (500 MHz, CDCl<sub>3</sub>) δ 7.74 (d, *J* = 8.0 Hz, 1H), 7.58 (d, *J* = 7.5 Hz, 2H), 7.25 – 7.23 (m, 3H), 7.08 (t, *J* = 7.5 Hz, 1H), 6.95 (d, *J* = 7.0 Hz, 1H), 4.19 (t, *J* = 6.0 Hz, 2H), 3.01 (t, *J* = 6.1 Hz, 2H), 2.39 (s, 3H), 2.29 – 2.24 (m, 2H). <sup>13</sup>C NMR (125 MHz, CDCl<sub>3</sub>) δ 134.0, 133.9, 132.2, 128.4, 125.8, 122.7, 122.4, 120.9, 119.2, 117.8, 116.5, 115.5, 43.1, 23.7, 21.8, 20.1. LRMS (EI, 70 eV) *m/z* (%): 247 (100), 246 (35), 231 (8), 154 (10), 128 (16) 73 (4). HRMS (ESI) for C<sub>18</sub>H<sub>18</sub>N (M+H)<sup>+</sup>: calcd 248.1434, found 248.1429.

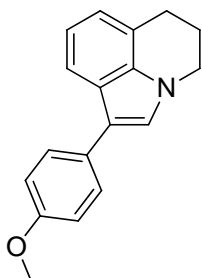

**1-(4-methoxyphenyl)-5,6-dihydro-4H-pyrrolo[3,2,1-ij]quinoline (2c).** White solid. 78% yield (41.2 mg). M.P.: 126.1 – 126.8°C. <sup>1</sup>H NMR (500 MHz, CDCl<sub>3</sub>) δ 7.70 (d, *J* = 8.0 Hz, 1H), 7.61 – 7.59 (m, 2H), 7.19 (s, 1H), 7.07 (d, *J* = 8.0 Hz, 1H), 7.00 – 6.94 (m, 3H), 4.17 (t, *J* = 6.0 Hz, 2H), 3.85 (s, 3H), 3.00 (t, *J* = 6.1 Hz, 2H), 2.28 – 2.24 (m, 2H). <sup>13</sup>C NMR (125 MHz, CDCl<sub>3</sub>) δ 157.8, 134.9, 128.9, 128.0, 123.8, 123.1, 122.0, 120.2, 118.9, 117.5, 116.3, 114.3, 55.4, 44.2, 24.8, 22.99. LRMS (EI, 70 eV) *m/z* (%): 263 (100), 248 (92), 240 (11), 192 (60), 131 (12). HRMS (ESI) for C<sub>18</sub>H<sub>18</sub>NO (M+H)<sup>+</sup>: calcd 264.1383, found 264.1382.

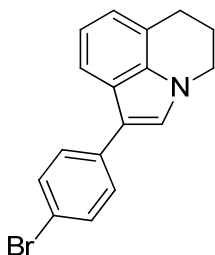

**1-(4-bromophenyl)-5,6-dihydro-4H-pyrrolo[3,2,1-ij]quinoline (2d).** Yellow solid. 82% yield (51.3 mg). M.P.: 155.3 – 156.5°C. <sup>1</sup>H NMR (500 MHz, CDCl<sub>3</sub>) δ 7.70 – 7.69 (m, 1H), 7.55 – 7.51 (m, 4H), 7.27 (s, 1H), 7.11 (d, *J* = 8.0 Hz, 1H), 6.98 (d, *J* = 7.1 Hz, 1H), 4.19 (t, *J* = 6.0 Hz, 2H), 3.02 (t, *J* = 6.1 Hz, 2H), 2.29 – 2.24 (m, 2H). <sup>13</sup>C NMR (125 MHz, CDCl<sub>3</sub>) δ 135.2, 135.0, 131.8, 128.3, 123.9, 123.5, 122.2, 120.7, 119.2, 118.9, 117.3, 115.4, 44.3, 24.7, 22.8. LRMS (EI, 70 eV) *m/z* (%): 311 (100), 313 (98), 312 (40), 230 (20), 102 (15). HRMS (ESI) for C<sub>17</sub>H<sub>15</sub>BrN (M+H)<sup>+</sup>: calcd 312.0382, found 312.0379.

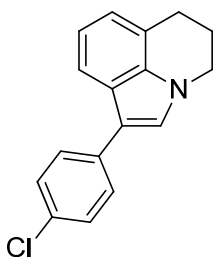

**1-(4-chlorophenyl)-5,6-dihydro-4H-pyrrolo[3,2,1-ij]quinoline (2e).** Yellow solid. 84% yield (45.2 mg). M.P.: 127.5 – 128.3°C. <sup>1</sup>H NMR (500 MHz, CDCl<sub>3</sub>) δ 7.69 (d, *J* = 8.0 Hz, 1H), 7.60 – 7.57 (m, 2H), 7.38 – 7.35 (m, 2H), 7.24 (s, 1H), 7.10 (d, *J* = 8.0 Hz, 1H), 6.96 (d, *J* = 7.2 Hz, 1H), 4.17 (t, *J* = 6.0 Hz, 2H), 3.00 (t, *J* = 6.1 Hz, 2H), 2.27 – 2.22 (m, 2H). <sup>13</sup>C NMR (125 MHz, CDCl<sub>3</sub>) δ 135.0, 134.7, 131.0, 128.9, 128.0, 123.9, 123.6, 122.2, 120.6, 119.2, 117.3, 115.4, 44.3, 24.7, 22.8. LRMS (EI, 70 eV) *m/z* (%): 267 (100), 266 (36), 230 (15), 154 (11), 88 (25) 75 (10). HRMS (ESI) for C<sub>17</sub>H<sub>15</sub>ClN (M+H)<sup>+</sup>: calcd 268.0888, found 268.0886.

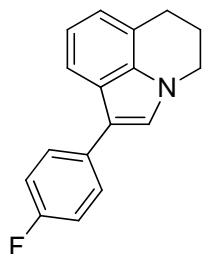

**1-(4-fluorophenyl)-5,6-dihydro-4H-pyrrolo[3,2,1-ij]quinoline (2f).** Yellow oil. 87% yield (43.9 mg).  $^1\text{H}$  NMR (500 MHz,  $\text{CDCl}_3$ )  $\delta$  7.68 (d,  $J = 8.1$  Hz, 1H), 7.60 (d,  $J = 8.5$  Hz, 2H), 7.21 (s, 1H), 7.15 – 7.05 (m, 3H), 6.96 (d,  $J = 7.0$  Hz, 1H), 4.17 (t,  $J = 6.0$  Hz, 2H), 3.01 (t,  $J = 6.1$  Hz, 2H), 2.31 – 2.20 (m, 2H).  $^{13}\text{C}$  NMR (125 MHz,  $\text{CDCl}_3$ )  $\delta$  161.2 (d,  $J_{\text{C-F}} = 242.5$  Hz), 134.9, 132.2 (d,  $J_{\text{C-F}} = 3.1$  Hz), 128.2 (d,  $J_{\text{C-F}} = 7.6$  Hz), 123.7, 123.5, 122.1, 120.5, 119.1, 117.2, 115.7, 115.6 (d,  $J_{\text{C-F}} = 21.1$  Hz), 44.2, 24.7, 22.8. LRMS (EI, 70 eV)  $m/z$  (%): 251 (100), 232 (9), 207 (5), 154 (11), 125 (11) 75 (4). HRMS (ESI) for  $\text{C}_{17}\text{H}_{15}\text{FN}$  ( $\text{M}+\text{H}$ ) $^+$ : calcd 252.1183, found 252.1177.

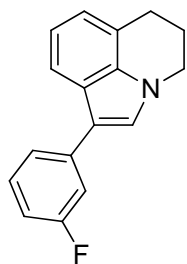

**1-(3-fluorophenyl)-5,6-dihydro-4H-pyrrolo[3,2,1-ij]quinoline (2g).** Yellow oil. 86% yield (43.3 mg).  $^1\text{H}$  NMR (500 MHz,  $\text{CDCl}_3$ )  $\delta$  7.73 (d,  $J = 8.1$  Hz, 1H), 7.44 (d,  $J = 7.8$  Hz, 1H), 7.38 – 7.32 (m, 2H), 7.22 (s, 1H), 7.12 – 7.09 (m, 1H), 6.97 – 6.89 (m, 2H), 4.17 (t,  $J = 6.0$  Hz, 2H), 3.00 (t,  $J = 6.1$  Hz, 2H), 2.27 – 2.22 (m, 2H).  $^{13}\text{C}$  NMR (125 MHz,  $\text{CDCl}_3$ )  $\delta$  163.4 (d,  $J_{\text{C-F}} = 243$  Hz), 138.5 (d,  $J_{\text{C-F}} = 8.3$  Hz), 135.0, 130.1 (d,  $J_{\text{C-F}} = 8.8$  Hz), 124.2, 122.3 (d,  $J_{\text{C-F}} = 2.6$  Hz), 122.3, 122.2, 120.7, 119.2, 117.4, 115.5 (d,  $J_{\text{C-F}} = 2.4$  Hz), 113.3 (d,  $J_{\text{C-F}} = 21.6$  Hz), 112.0 (d,  $J_{\text{C-F}} = 21.1$  Hz), 44.3, 24.7, 22.80. LRMS (EI, 70 eV)  $m/z$  (%): 251 (100), 222 (6), 154 (3), 125 (3). HRMS (ESI) for  $\text{C}_{17}\text{H}_{15}\text{FN}$  ( $\text{M}+\text{H}$ ) $^+$ : calcd 252.1183, found 252.1178.

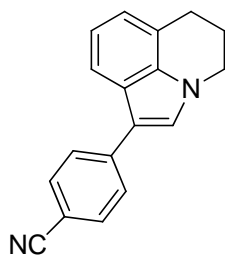

**4-(5,6-dihydro-4H-pyrrolo[3,2,1-ij]quinolin-1-yl)benzonitrile (2h).** White solid. 53% yield (27.3 mg). M.P.: 135.5 – 136.2°C.  $^1\text{H}$  NMR (500 MHz,  $\text{CDCl}_3$ )  $\delta$  7.76 – 7.72 (m, 3H), 7.67 – 7.65 (m, 2H), 7.38 (s, 1H), 7.15 (d,  $J = 8.0$  Hz, 1H), 7.01 (d,  $J = 7.2$  Hz, 1H), 4.21 (t,  $J = 6.0$  Hz, 2H), 3.03 (t,  $J = 6.1$  Hz, 2H), 2.30 – 2.25 (m, 2H).  $^{13}\text{C}$  NMR (125 MHz,  $\text{CDCl}_3$ )  $\delta$  141.2, 135.2, 132.6, 126.5, 125.1, 123.4, 122.5, 121.3, 119.7, 119.6, 117.3, 114.8, 108.1, 44.5, 24.7, 22.7. LRMS (EI, 70 eV)  $m/z$  (%): 258 (100), 242 (5), 230 (6), 202 (4), 128 (8). HRMS (ESI) for  $\text{C}_{18}\text{H}_{15}\text{N}_2$  ( $\text{M}+\text{H}$ ) $^+$ : calcd 259.1230, found 259.1227.

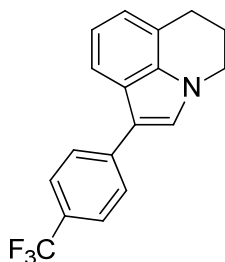

**1-(4-(trifluoromethyl)phenyl)-5,6-dihydro-4H-pyrrolo[3,2,1-ij]quinoline (2i).** Yellow solid. 78% yield (46.9 mg). M.P.: 95.2 – 96.0°C.  $^1\text{H}$  NMR (500 MHz,  $\text{CDCl}_3$ )  $\delta$  7.75 (dd,  $J = 13.2, 4.6$  Hz, 3H), 7.64 (d,  $J = 8.0$  Hz, 2H), 7.33 (s, 1H), 7.13 (dd,  $J = 8.0, 7.1$  Hz, 1H), 6.99 (dd,  $J = 7.1, 0.7$  Hz, 1H),

4.18 (t,  $J = 6.0$  Hz, 2H), 3.02 (t,  $J = 6.1$  Hz, 2H), 2.28 – 2.23 (m, 2H).  $^{13}\text{C}$  NMR (125 MHz,  $\text{CDCl}_3$ )  $\delta$  140.0, 135.1, 127.1 (q,  $J_{\text{C-F}} = 32.1$  Hz), 126.5, 125.7 (q,  $J_{\text{C-F}} = 3.9$  Hz), 124.6, 124.6 (q,  $J_{\text{C-F}} = 269.9$  Hz), 123.5, 122.4, 121.0, 119.4, 117.3, 115.2, 44.4, 24.7, 22.8. LRMS (EI, 70 eV)  $m/z$  (%): 301 (100), 300 (77), 245 (10), 230 (19), 123 (23). HRMS (ESI) for  $\text{C}_{18}\text{H}_{15}\text{F}_3\text{N}$  ( $\text{M}+\text{H}$ ) $^+$ : calcd 302.1151, found 302.1171.

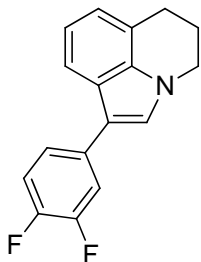

**1-(3,4-difluorophenyl)-5,6-dihydro-4H-pyrrolo[3,2,1-ij]quinoline (2j).** Yellow oil. 92% yield (49.5 mg).  $^1\text{H}$  NMR (500 MHz,  $\text{CDCl}_3$ )  $\delta$  7.67 (d,  $J = 8.0$  Hz, 1H), 7.46-7.41 (m, 1H), 7.36 – 7.33 (m, 1H), 7.22 – 7.15 (m, 2H), 7.12 – 7.10 (m, 1H), 6.97 (d,  $J = 6.6$  Hz, 1H), 4.18 (t,  $J = 6.0$  Hz, 2H), 3.01 (t,  $J = 6.1$  Hz, 2H), 2.28-2.34 (m, 2H).  $^{13}\text{C}$  NMR (125 MHz,  $\text{CDCl}_3$ )  $\delta$  150.6 (dd,  $J_{\text{C-F}} = 245.3$ ,  $J_{\text{C-F}} = 12.8$  Hz), 148.5 (dd,  $J_{\text{C-F}} = 244.4$ ,  $J_{\text{C-F}} = 12.8$  Hz), 135.0, 133.4 (dd,  $J_{\text{C-F}} = 6.6$ ,  $J_{\text{C-F}} = 3.8$  Hz), 123.9, 123.4, 122.4 (dd,  $J_{\text{C-F}} = 3.4$ ,  $J_{\text{C-F}} = 5.8$  Hz), 122.2, 120.8, 119.3, 117.4 (d,  $J_{\text{C-F}} = 16.6$  Hz), 117.0, 115.3 (d,  $J_{\text{C-F}} = 17.4$  Hz), 114.7, 44.3, 24.7, 22.8. LRMS (EI, 70 eV)  $m/z$  (%): 269 (100), 241 (7), 213 (3), 154 (7), 135 (8). HRMS (ESI) for  $\text{C}_{17}\text{H}_{14}\text{F}_2\text{N}$  ( $\text{M}+\text{H}$ ) $^+$ : calcd 270.1089, found 270.1081.

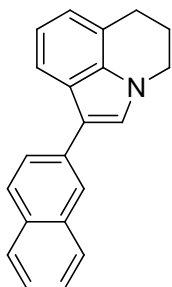

**1-(naphthalen-2-yl)-5,6-dihydro-4H-pyrrolo[3,2,1-ij]quinoline (2k).** Yellow solid. 72% yield (40.9 mg). M.P.: 115.1 – 116.2°C.  $^1\text{H}$  NMR (500 MHz,  $\text{CDCl}_3$ )  $\delta$  8.14 (s, 1H), 7.90 – 7.86 (m, 3H), 7.84 – 7.81 (m, 2H), 7.50 – 7.46 (m, 1H), 7.44 – 7.40 (m, 2H), 7.15 (d,  $J = 7.9$  Hz, 1H), 7.00 (d,  $J = 7.0$  Hz, 1H), 4.22 (t,  $J = 6.0$  Hz, 2H), 3.04 (t,  $J = 6.1$  Hz, 2H), 2.31 – 2.26 (m, 2H).  $^{13}\text{C}$  NMR (125 MHz,  $\text{CDCl}_3$ )  $\delta$  135.1, 134.1, 133.7, 131.8, 128.2, 127.7, 127.7, 126.1, 126.1, 125.0, 124.3, 124.2, 123.9, 122.2, 120.6, 119.2, 117.7, 116.5, 44.3, 24.8, 22.8. LRMS (EI, 70 eV)  $m/z$  (%): 283 (100), 254 (7), 226 (5), 141 (8), 139 (4). HRMS (ESI) for  $\text{C}_{21}\text{H}_{18}\text{N}$  ( $\text{M}+\text{H}$ ) $^+$ : calcd 284.1434, found 284.1419.

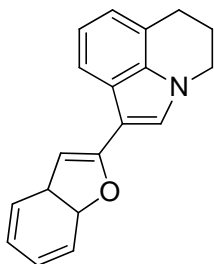

**1-(3a,7a-dihydrobenzofuran-2-yl)-5,6-dihydro-4H-pyrrolo[3,2,1-ij]quinoline (2l).** Yellow solid. 72% yield (39.5 mg). M.P.: 138.7 – 139.5°C.  $^1\text{H}$  NMR (500 MHz,  $\text{CDCl}_3$ )  $\delta$  7.80 (d,  $J = 8.0$  Hz, 1H), 7.61 (s, 1H), 7.55 – 7.54 (m, 1H), 7.48 – 7.47 (m, 1H), 7.21 – 7.16 (m, 3H), 7.00 (d,  $J = 7.1$  Hz, 1H), 6.86 (d,  $J = 0.5$  Hz, 1H), 4.20 (t,  $J = 6.0$  Hz, 2H), 3.01 (t,  $J = 6.1$  Hz, 2H), 2.29 – 2.24 (m, 2H).  $^{13}\text{C}$  NMR (125 MHz,  $\text{CDCl}_3$ )  $\delta$  153.9, 153.5, 134.8, 130.1, 124.7, 122.9, 122.8, 122.6, 122.3, 121.1, 120.0, 119.6, 117.8, 110.5, 107.0, 98.8, 44.5, 24.6, 22.8. LRMS (EI, 70 eV)  $m/z$  (%): 273 (100), 245 (6), 189 (3), 136 (6), 120 (3). HRMS (ESI) for  $\text{C}_{19}\text{H}_{18}\text{NO}$  ( $\text{M}+\text{H}$ ) $^+$ : calcd 274.1226, found 274.1222.

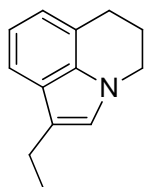

**1-ethyl-5,6-dihydro-4H-pyrrolo[3,2,1-ij]quinoline (2m).** Yellow oil. 92% yield (34.2 mg).  $^1\text{H}$  NMR (500 MHz,  $\text{CDCl}_3$ )  $\delta$  7.41 (d,  $J = 7.9$  Hz, 1H), 7.00 – 6.97 (m, 1H), 6.89 (d,  $J = 7.0$  Hz, 1H), 6.85 (s, 1H), 4.13 – 4.06 (m, 2H), 2.97 (t,  $J = 6.1$  Hz, 2H), 2.80 – 2.76 (m, 2H), 2.24 – 2.20 (m, 2H), 1.34 – 1.31 (m, 3H).  $^{13}\text{C}$  NMR (125 MHz,  $\text{CDCl}_3$ )  $\delta$  134.6, 125.2, 122.7, 121.6, 118.9, 118.3, 117.4, 116.6, 43.8, 24.8, 23.0, 18.7, 15.0. LRMS (EI, 70 eV)  $m/z$  (%): 185 (37), 170 (100), 168 (4), 142 (16), 115 (5). HRMS (ESI) for  $\text{C}_{13}\text{H}_{16}\text{N}$  ( $\text{M}+\text{H}$ ) $^+$ : calcd 186.1277, found 186.1274.

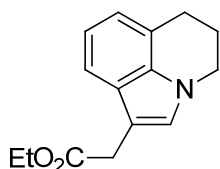

**Ethyl 2-(5,6-dihydro-4H-pyrrolo[3,2,1-ij]quinolin-1-yl)acetate (2n).** Yellow oil. 61% yield (29.8 mg).  $^1\text{H}$  NMR (500 MHz,  $\text{CDCl}_3$ )  $\delta$  7.42 (d,  $J = 8.0$  Hz, 1H), 7.05 – 7.01 (m, 2H), 6.91 (d,  $J = 7.0$  Hz, 1H), 4.16 (q,  $J = 7.0$  Hz, 2H), 4.11 (t,  $J = 6.0$  Hz, 2H), 3.75 (s, 2H), 2.97 (t,  $J = 6.1$  Hz, 2H), 2.24 – 2.19 (m, 2H), 1.28 – 1.25 (m, 3H).  $^{13}\text{C}$  NMR (125 MHz,  $\text{CDCl}_3$ )  $\delta$  172.3, 134.4, 125.3, 125.0, 121.7, 119.6, 118.6, 116.6, 106.9, 60.7, 44.0, 31.7, 24.7, 22.9, 14.3. LRMS (EI, 70 eV)  $m/z$  (%): 170 (100), 142 (27), 243 (3), 83 (2). HRMS (ESI) for  $\text{C}_{15}\text{H}_{18}\text{NO}_2$  ( $\text{M}+\text{H}$ ) $^+$ : calcd 244.1332, found 244.1330.

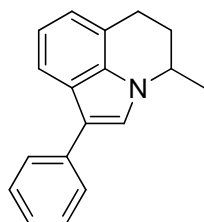

**4-methyl-1-phenyl-5,6-dihydro-4H-pyrrolo[3,2,1-ij]quinoline (2o).** Yellow oil. 78% yield (38.5 mg).  $^1\text{H}$  NMR (500 MHz,  $\text{CDCl}_3$ )  $\delta$  7.76 (d,  $J = 8.1$  Hz, 1H), 7.68 (dd,  $J = 8.2, 1.1$  Hz, 2H), 7.41 (t,  $J = 8.1$  Hz, 2H), 7.36 (s, 1H), 7.24 – 7.21 (m, 1H), 7.11 – 7.10 (m, 1H), 6.97 – 6.95 (m, 1H), 4.35 – 4.29 (m, 1H), 3.03 – 3.00 (m, 2H), 2.25 – 2.22 (m, 1H), 2.00 – 1.96 (m, 1H), 1.55 (d,  $J = 6.5$  Hz, 3H).  $^{13}\text{C}$  NMR (125 MHz,  $\text{CDCl}_3$ )  $\delta$  136.4, 135.0, 128.8, 127.0, 125.5, 124.0, 122.1, 122.0, 120.3, 119.0, 117.5, 116.8, 49.8, 30.71, 23.62, 20.79. LRMS (EI, 70 eV)  $m/z$  (%): 247 (91), 246 (32), 232 (100), 230 (20), 204 (9), 154 (7). HRMS (ESI) for  $\text{C}_{18}\text{H}_{18}\text{N}$  ( $\text{M}+\text{H}$ ) $^+$ : calcd 248.1434, found 248.1441.

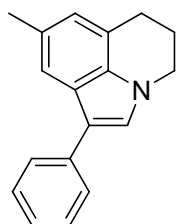

**8-methyl-1-phenyl-5,6-dihydro-4H-pyrrolo[3,2,1-ij]quinoline (2p).** Yellow oil. 73% yield (36.1 mg).  $^1\text{H}$  NMR (500 MHz,  $\text{CDCl}_3$ )  $\delta$  7.71 – 7.66 (m, 2H), 7.54 (s, 1H), 7.41 (t,  $J = 7.7$  Hz, 2H), 7.23 – 7.20 (m, 2H), 6.81 (s, 1H), 4.14 (t,  $J = 6.0$  Hz, 2H), 2.96 (t,  $J = 6.0$  Hz, 2H), 2.46 (s, 3H), 2.25 – 2.20 (m, 2H).  $^{13}\text{C}$  NMR (125 MHz,  $\text{CDCl}_3$ )  $\delta$  136.5, 133.5, 129.8, 128.8, 126.9, 125.4, 124.0, 123.8, 121.8, 120.8, 117.1, 116.2, 44.2, 24.8, 23.1, 22.0. LRMS (EI, 70 eV)  $m/z$  (%): 247 (100), 246 (32), 230 (10), 123 (7), 108 (5). HRMS (ESI) for  $\text{C}_{18}\text{H}_{18}\text{N}$  ( $\text{M}+\text{H}$ ) $^+$ : calcd 248.1434, found 248.1439.

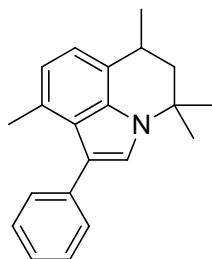

**4,4,6,9-tetramethyl-1-phenyl-5,6-dihydro-4H-pyrrolo[3,2,1-ij]quinoline (2q).** Yellow oil. 76% yield (43.9 mg).  $^1\text{H}$  NMR (500 MHz,  $\text{CDCl}_3$ )  $\delta$  7.46 (d,  $J = 7.0$  Hz, 2H), 7.36 (t,  $J = 7.6$  Hz, 2H), 7.29 (t,  $J = 7.4$  Hz, 1H), 7.17 (s, 1H), 7.00 (d,  $J = 7.2$  Hz, 1H), 6.84 (d,  $J = 7.2$  Hz, 1H), 3.27 – 3.23 (m, 1H), 2.31 (s, 3H), 2.01 (dd,  $J = 13.2, 4.7$  Hz, 1H), 1.85 (t,  $J = 12.7$  Hz, 1H), 1.66 (s, 3H), 1.48 (d,  $J = 6.7$  Hz, 3H), 1.42 (s, 3H).  $^{13}\text{C}$  NMR (125 MHz,  $\text{CDCl}_3$ )  $\delta$  137.5, 133.7, 130.6, 128.6, 127.7, 126.1, 124.2, 123.6, 121.6, 121.2, 118.8, 116.9, 53.9, 46.4, 29.1, 28.9, 27.2, 20.6, 18.7. LRMS (EI, 70 eV)  $m/z$  (%): 289 (72), 274 (100), 258 (15), 244 (19), 230 (6). HRMS (ESI) for  $\text{C}_{21}\text{H}_{24}\text{N}$  ( $\text{M}+\text{H}$ ) $^+$ : calcd 290.1903, found 290.1915.

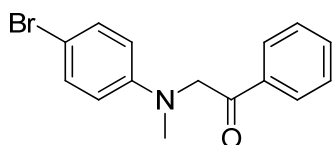

**2-((4-bromophenyl)(methyl)amino)-1-phenylethanone (3m).** Yellow solid. M.P.: 119.6 – 120.5°C.  $^1\text{H}$  NMR (500 MHz,  $\text{CDCl}_3$ )  $\delta$  7.97 – 7.95 (m, 2H), 7.63 – 7.60 (m, 1H), 7.51–7.48 (m, 2H), 7.28 – 7.25 (m, 2H), 6.54 – 6.51 (m, 2H), 4.75 (s, 2H), 3.07 (s, 3H).  $^{13}\text{C}$  NMR (125 MHz,  $\text{CDCl}_3$ )  $\delta$  195.9, 148.3, 135.3, 133.7, 131.9, 128.9, 127.8, 113.9, 109.1, 58.8, 39.7. LRMS (EI, 70 eV)  $m/z$  (%): 305 (13), 287 (48), 285 (48), 200 (97), 198 (100), 165 (10). HRMS (ESI) for  $\text{C}_{15}\text{H}_{15}\text{BrNO}$  ( $\text{M}+\text{H}$ ) $^+$ : calcd 304.0332, found 304.0324.

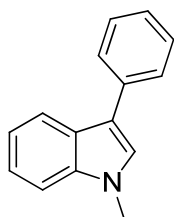

**1-methyl-3-phenyl-1H-indole (4a)**<sup>1</sup>. Yellow solid. 93% yield (38.6 mg). M.P.: 61.8 – 62.9°C.  $^1\text{H}$  NMR (500 MHz,  $\text{CDCl}_3$ )  $\delta$  7.95 (d,  $J = 8.0$  Hz, 1H), 7.67 – 7.65 (m, 2H), 7.45 – 7.41 (m, 2H), 7.35 (d,  $J = 8.2$  Hz, 1H), 7.29 – 7.25 (m, 2H), 7.21 – 7.17 (m, 2H), 3.80 (s, 3H).  $^{13}\text{C}$  NMR (125 MHz,  $\text{CDCl}_3$ )  $\delta$  137.5, 135.7, 128.8, 127.4, 126.6, 126.2, 125.7, 122.0, 120.0, 119.9, 116.8, 109.6, 32.9. LRMS (EI, 70 eV)  $m/z$  (%): 207 (100), 192 (12), 165 (32), 103 (12).

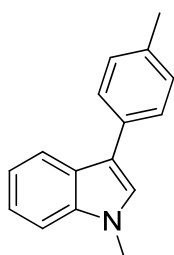

**1-methyl-3-(p-tolyl)-1H-indole (4b)**<sup>2</sup>. Yellow solid. 86% yield (38.0 mg). M.P.: 65.5 – 66.2°C.  $^1\text{H}$  NMR (500 MHz,  $\text{CDCl}_3$ )  $\delta$  7.93 (d,  $J = 8.0$  Hz, 1H), 7.55 (d,  $J = 8.0$  Hz, 2H), 7.34 (d,  $J = 8.2$  Hz, 1H), 7.28 – 7.24 (m, 3H), 7.19 – 7.16 (m, 2H), 3.79 (s, 3H), 2.39 (s, 3H).  $^{13}\text{C}$  NMR (125 MHz,  $\text{CDCl}_3$ )  $\delta$  137.5, 135.3, 132.8, 129.5, 127.3, 126.3, 121.9, 120.0, 119.8, 116.7, 109.5, 32.8, 21.2. LRMS (EI, 70 eV)  $m/z$  (%): 221 (100), 204 (9), 178 (11), 165 (7), 110 (7).



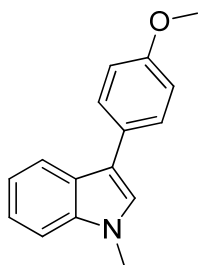

**3-(4-methoxyphenyl)-1-methyl-1H-indole (4c)**<sup>2</sup>. White solid. 71% yield (33.8 mg). M.P.: 171.3 – 171.8°C. <sup>1</sup>H NMR (500 MHz, CDCl<sub>3</sub>) δ 7.89 (d, *J* = 8.0 Hz, 1H), 7.57 – 7.55 (m, 2H), 7.34 (d, *J* = 8.2 Hz, 1H), 7.28 – 7.24 (m, 1H), 7.18 – 7.15 (m, 1H), 7.13 (s, 1H), 7.00 – 6.97 (m, 2H), 3.84 (s, 3H), 3.80 (s, 3H). <sup>13</sup>C NMR (125 MHz, CDCl<sub>3</sub>) δ 158.0, 137.4, 128.5, 128.3, 126.3, 126.0, 121.9, 119.9, 119.7, 116.5, 114.3, 109.5, 55.4, 32.8. LRMS (EI, 70 eV) *m/z* (%): 237 (92), 222 (100), 194 (11), 151 (6), 118 (9).

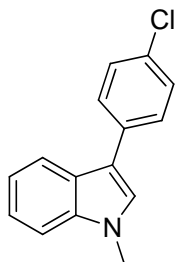

**3-(4-chlorophenyl)-1-methyl-1H-indole (4d)**<sup>1</sup>. 72% yield (34.9 mg). Yellow solid. M.P.: 95.1 – 96.1°C. <sup>1</sup>H NMR (500 MHz, CDCl<sub>3</sub>) δ 7.87 (d, *J* = 8.0 Hz, 1H), 7.57 – 7.55 (m, 2H), 7.39 – 7.35 (m, 3H), 7.30 – 7.27 (m, 1H), 7.21 – 7.18 (m, 2H), 3.81 (s, 3H). <sup>13</sup>C NMR (125 MHz, CDCl<sub>3</sub>) δ 137.5, 134.2, 131.3, 128.9, 128.4, 126.6, 126.0, 122.2, 120.1, 119.7, 115.6, 109.7, 32.9. LRMS (EI, 70 eV) *m/z* (%): 241 (100), 226 (12), 190 (13), 163 (11), 102 (10).

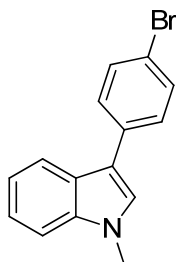

**3-(4-bromophenyl)-1-methyl-1H-indole (4e)**<sup>2</sup>. Yellow solid. 91% yield (51.9 mg). M.P.: 107.2 – 108.3°C. <sup>1</sup>H NMR (500 MHz, CDCl<sub>3</sub>) δ 7.88 (d, *J* = 8.0 Hz, 1H), 7.55 – 7.50 (m, 4H), 7.34 (d, *J* = 8.2 Hz, 1H), 7.31 – 7.28 (m, 1H), 7.22 – 7.19 (m, 2H), 3.82 (s, 3H). <sup>13</sup>C NMR (125 MHz, CDCl<sub>3</sub>) δ 137.6, 134.7, 131.8, 128.8, 126.7, 125.9, 122.2, 120.2, 119.7, 119.3, 115.6, 109.7, 32.9. LRMS (EI, 70 eV) *m/z* (%): 287 (100), 285 (100), 190 (15), 165 (15), 164 (11).

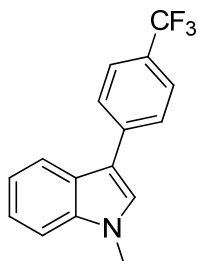

**1-methyl-3-(4-(trifluoromethyl)phenyl)-1H-indole (4f)**<sup>4</sup>. Yellow solid. 65% yield (35.7 mg). M.P.: 81.0 – 81.5°C. <sup>1</sup>H NMR (500 MHz, CDCl<sub>3</sub>) δ 7.93 (d, *J* = 8.0 Hz, 1H), 7.75 (d, *J* = 8.1 Hz, 2H), 7.66 (d, *J* = 8.1 Hz, 2H), 7.38 (d, *J* = 8.2 Hz, 1H), 7.33 – 7.29 (m, 2H), 7.23 – 7.21 (m, 1H), 3.84 (s, 3H). <sup>13</sup>C NMR (125 MHz, CDCl<sub>3</sub>) δ 139.4, 137.6, 127.6, 127.3, 127.1, 125.9, 125.7 (q, *J*<sub>C-F</sub> = 3.8 Hz), 124.6 (q, *J*<sub>C-F</sub> = 270.1 Hz), 122.4, 120.5, 119.7, 115.4, 109.8, 33.0. LRMS (EI, 70 eV) *m/z* (%): 275 (100), 260 (7), 165 (12), 128 (5), 137 (5).

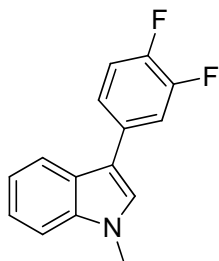

**3-(3,4-difluorophenyl)-1-methyl-1H-indole (4g)**. Yellow oil. 61% yield (29.8 mg).  $^1\text{H}$  NMR (500 MHz,  $\text{CDCl}_3$ )  $\delta$  7.85 (d,  $J = 8.0$  Hz, 1H), 7.44 – 7.40 (m, 1H), 7.36 (d,  $J = 8.2$  Hz, 1H), 7.33 – 7.28 (m, 2H), 7.22 – 7.17 (m, 3H), 3.83 (s, 3H).  $^{13}\text{C}$  NMR (125 MHz,  $\text{CDCl}_3$ )  $\delta$  150.6 (dd,  $J_{\text{C-F}} = 232.4$ ,  $J = 12.6$  Hz), 148.7 (dd,  $J_{\text{C-F}} = 231.8$ ,  $J_{\text{C-F}} = 12.9$  Hz), 137.5, 132.8 (dd,  $J_{\text{C-F}} = 6.6$ ,  $J_{\text{C-F}} = 3.9$  Hz), 126.7, 125.9, 123.0 (dd,  $J_{\text{C-F}} = 5.8$ ,  $J_{\text{C-F}} = 3.3$  Hz), 122.3, 120.3, 119.4, 117.4 (d,  $J_{\text{C-F}} = 17.3$  Hz), 115.8 (d,  $J_{\text{C-F}} = 17.3$  Hz), 114.9, 109.7, 32.9. LRMS (EI, 70 eV)  $m/z$  (%): 243 (100), 201 (33), 175 (5), 121 (13), 128 (8). HRMS (ESI) for  $\text{C}_{15}\text{H}_{12}\text{F}_2\text{N}$  ( $\text{M}+\text{H}$ ) $^+$ : calcd 244.0932, found 244.0922.

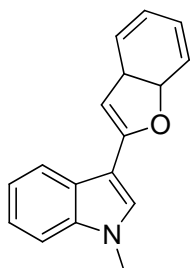

**3-(3a,7a-dihydrobenzofuran-2-yl)-1-methyl-1H-indole (4h)**<sup>1</sup>. Yellow solid. 47% yield (23.3mg). M.P.: 108.3 – 109.0°C.  $^1\text{H}$  NMR (500 MHz,  $\text{CDCl}_3$ )  $\delta$  8.03 (d,  $J = 7.8$  Hz, 1H), 7.58 (s, 1H), 7.56 – 7.54 (m, 1H), 7.49 – 7.47 (m, 1H), 7.36 (d,  $J = 7.9$  Hz, 1H), 7.33 – 7.26 (m, 2H), 7.23 – 7.20 (m, 2H), 6.87 (s, 1H), 3.82 (s, 3H).  $^{13}\text{C}$  NMR (125 MHz,  $\text{CDCl}_3$ )  $\delta$  153.9, 153.0, 137.4, 129.9, 127.6, 125.1, 123.0, 122.7, 122.5, 120.7, 120.4, 120.0, 110.6, 109.8, 107.0, 99.0, 33.1. LRMS (EI, 70 eV)  $m/z$  (%): 247 (100), 232 (5), 176 (10), 123 (18).

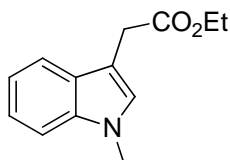

**Ethyl 2-(1-methyl-1H-indol-3-yl)acetate (4i)**<sup>3</sup>. Yellow oil. 71% yield (30.7 mg).  $^1\text{H}$  NMR (500 MHz,  $\text{CDCl}_3$ )  $\delta$  7.59 (d,  $J = 7.9$  Hz, 1H), 7.28 (d,  $J = 8.2$  Hz, 1H), 7.23 – 7.20 (m, 1H), 7.13 – 7.10 (m, 1H), 7.02 (s, 1H), 4.17 – 4.13 (m, 2H), 3.73 (d,  $J = 6.3$  Hz, 5H), 1.25 (t,  $J = 7.1$  Hz, 3H).  $^{13}\text{C}$  NMR (125 MHz,  $\text{CDCl}_3$ )  $\delta$  172.2, 137.0, 127.7, 127.7, 121.7, 119.1, 119.0, 109.3, 107.0, 60.8, 32.7, 31.4, 14.3. LRMS (EI, 70 eV)  $m/z$  (%): 217 (15), 144 (100), 128 (4), 102 (5).

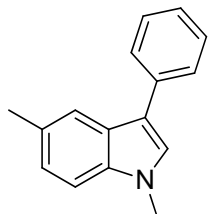

**1,5-dimethyl-3-phenyl-1H-indole (4j)**<sup>5</sup>. Yellow solid. 70% yield (31.1 mg). M.P.: 64.3 – 64.9°C.  $^1\text{H}$  NMR (500 MHz,  $\text{CDCl}_3$ )  $\delta$  7.74 (s, 1H), 7.67 – 7.64 (m, 2H), 7.45 – 7.42 (m, 2H), 7.28 – 7.24 (m, 2H), 7.18 (s, 1H), 7.12 – 7.10 (m, 1H), 3.79 (s, 3H), 2.49 (s, 3H).  $^{13}\text{C}$  NMR (125 MHz,  $\text{CDCl}_3$ )  $\delta$  136.0, 135.9, 129.2, 128.7, 127.4, 126.7, 126.4, 125.6, 123.6, 119.6, 116.2, 109.3, 32.9, 21.6. LRMS (EI, 70 eV)  $m/z$  (%): 221 (100), 220 (45), 178 (11), 102 (8), 76 (3).

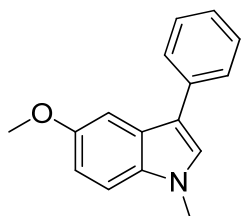

**5-methoxy-1-methyl-3-phenyl-1H-indole (4k).** Yellow solid. 68% yield (28.4 mg). M.P.: 78.8 – 79.9°C.  $^1\text{H}$  NMR (500 MHz,  $\text{CDCl}_3$ )  $\delta$  7.62 (d,  $J = 7.1$  Hz, 2H), 7.43 (t,  $J = 7.7$  Hz, 2H), 7.39 (d,  $J = 2.4$  Hz, 1H), 7.28 – 7.24 (m, 2H), 7.19 (s, 1H), 6.94 (dd,  $J = 8.8, 2.4$  Hz, 1H), 3.87 (s, 3H), 3.80 (s, 3H).  $^{13}\text{C}$  NMR (125 MHz,  $\text{CDCl}_3$ )  $\delta$  154.6, 135.8, 132.9, 128.8, 127.2, 127.2, 126.5, 125.6, 116.3, 112.3, 110.3, 101.9, 56.1, 33.0. LRMS (EI, 70 eV)  $m/z$  (%): 237 (100), 194(46), 152(24), 118 (10), 76 (6). HRMS (ESI) for  $\text{C}_{16}\text{H}_{16}\text{NO}$  ( $\text{M}+\text{H}$ ) $^+$ : calcd 238.1226, found 238.1229.

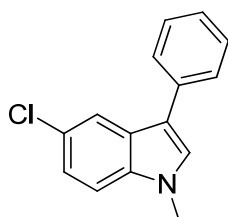

**5-chloro-1-methyl-3-phenyl-1H-indole (4l).** Yellow oil. 87% yield (42.2 mg).  $^1\text{H}$  NMR (500 MHz,  $\text{CDCl}_3$ )  $\delta$  7.88 (d,  $J = 1.8$  Hz, 1H), 7.60 – 7.58 (m, 2H), 7.45 – 7.42 (m, 2H), 7.30 – 7.24 (m, 2H), 7.22 – 7.20 (m, 2H), 3.80 (s, 3H).  $^{13}\text{C}$  NMR (125 MHz,  $\text{CDCl}_3$ )  $\delta$  135.9, 135.0, 128.9, 127.7, 127.3, 127.2, 126.1, 125.9, 122.3, 119.4, 116.5, 110.6, 33.1. LRMS (EI, 70 eV)  $m/z$  (%): 241 (100), 204 (10), 190 (13), 165 (20), 102 (16). HRMS (ESI) for  $\text{C}_{15}\text{H}_{13}\text{ClN}$  ( $\text{M}+\text{H}$ ) $^+$ : calcd 242.0731, found 242.0736. HRMS (ESI) for  $\text{C}_{15}\text{H}_{13}\text{ClN}$  ( $\text{M}+\text{H}$ ) $^+$ : calcd 242.0731, found 242.0736.

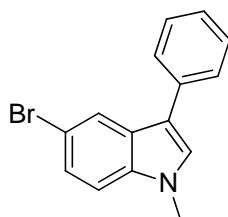

**5-bromo-1-methyl-3-phenyl-1H-indole (4m).** Brown oil. 65% yield (37.4 mg).  $^1\text{H}$  NMR (500 MHz,  $\text{CDCl}_3$ )  $\delta$  8.03 (s, 1H), 7.58 (d,  $J = 7.2$  Hz, 2H), 7.43 (t,  $J = 7.7$  Hz, 2H), 7.34 – 7.26 (m, 2H), 7.19 (d,  $J = 8.6$  Hz, 2H), 3.78 (s, 3H).  $^{13}\text{C}$  NMR (125 MHz,  $\text{CDCl}_3$ )  $\delta$  136.2, 134.9, 128.9, 127.8, 127.6, 127.3, 126.1, 124.8, 122.5, 116.5, 113.5, 111.0, 33.0. LRMS (EI, 70 eV)  $m/z$  (%): 287 (100), 286 (97), 204 (20), 165 (28), 163 (18), 102 (15). HRMS (ESI) for  $\text{C}_{15}\text{H}_{13}\text{BrN}$  ( $\text{M}+\text{H}$ ) $^+$ : calcd 286.0226, found 286.0233.

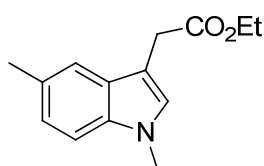

**Ethyl 2-(1,5-dimethyl-1H-indol-3-yl)acetate (4n).** Yellow oil. 68% yield (31.5 mg).  $^1\text{H}$  NMR (500 MHz,  $\text{CDCl}_3$ )  $\delta$  7.41 – 7.36 (m, 1H), 7.17 (d,  $J = 8.3$  Hz, 1H), 7.04 (dd,  $J = 8.3, 1.3$  Hz, 1H), 6.98 (s, 1H), 4.16 (q,  $J = 7.1$  Hz, 2H), 3.72 (s, 5H), 2.45 (s, 3H), 1.26 (t,  $J = 7.1$  Hz, 3H).  $^{13}\text{C}$  NMR (125 MHz,  $\text{CDCl}_3$ )  $\delta$  172.2, 135.4, 128.3, 127.9, 127.8, 123.4, 118.7, 109.0, 106.4, 60.7, 32.7, 31.34 (s), 21.5, 14.3. LRMS (EI, 70 eV)  $m/z$  (%): 231 (100), 242 (5), 230 (6), 202 (4), 128 (8). HRMS (ESI) for  $\text{C}_{14}\text{H}_{18}\text{NO}_2$  ( $\text{M}+\text{H}$ ) $^+$ : calcd 232.1332, found 232.1332.

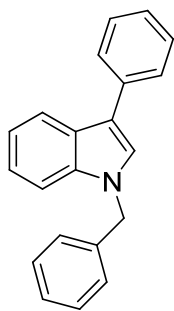

**1-benzyl-3-phenyl-1H-indole (4o).** Yellow oil. 85% yield (48.1 mg).  $^1\text{H}$  NMR (500 MHz,  $\text{CDCl}_3$ )  $\delta$  7.97 (d,  $J = 7.3$  Hz, 1H), 7.66 (dd,  $J = 8.2, 1.1$  Hz, 2H), 7.42 (t,  $J = 8.0$  Hz, 2H), 7.33 – 7.16 (m, 10H), 5.34 (s, 2H).  $^{13}\text{C}$  NMR (125 MHz,  $\text{CDCl}_3$ )  $\delta$  137.3, 137.2, 135.6, 128.9, 128.8, 127.8, 127.5, 127.0, 126.5, 126.0, 125.9, 122.2, 120.2, 120.1, 117.5, 110.1, 50.2. LRMS (EI, 70 eV)  $m/z$  (%): 283 (100), 192 (51), 165 (21), 92 (7), 65 (11). HRMS (ESI) for  $\text{C}_{21}\text{H}_{18}\text{N}$  ( $\text{M}+\text{H}$ ) $^+$ : calcd 284.1434, found 284.1442.

## 5. References

1. J. R. Donald and J. K. R. Taylor, *Synlett.*, 2009, **1**, 59 – 62.
2. R. J. Phipps, N. P. Grimster and M. J. Gaunt, *J. Am. Chem. Soc.*, 2008, **130**, 8172 – 8174.
3. W. Chen, I. N. Gaisina, H. Gunosewoyo, S. A. Malekiani, T. Hanania and A. P. Kozikowski, *ChemMedChem.*, 2011, **6**, 1587 – 1592.
4. Y. Huang, T. Ma, P. Huang, D. Wu, Z. Lin and R. Cao, *ChemCatChem.*, 2013, **5**, 1877 – 1883.
5. J. Barluenga, M. A. Fernández, F. Aznar and C. Valdés, *Chem. –Eur. J.*, 2005, **11**, 2276 – 2283.

## 6. NMR Spectra for products

### 2-(3,4-dihydroquinolin-1(2H)-yl)-1-(4-(trifluoromethyl)phenyl)ethanone (1i)

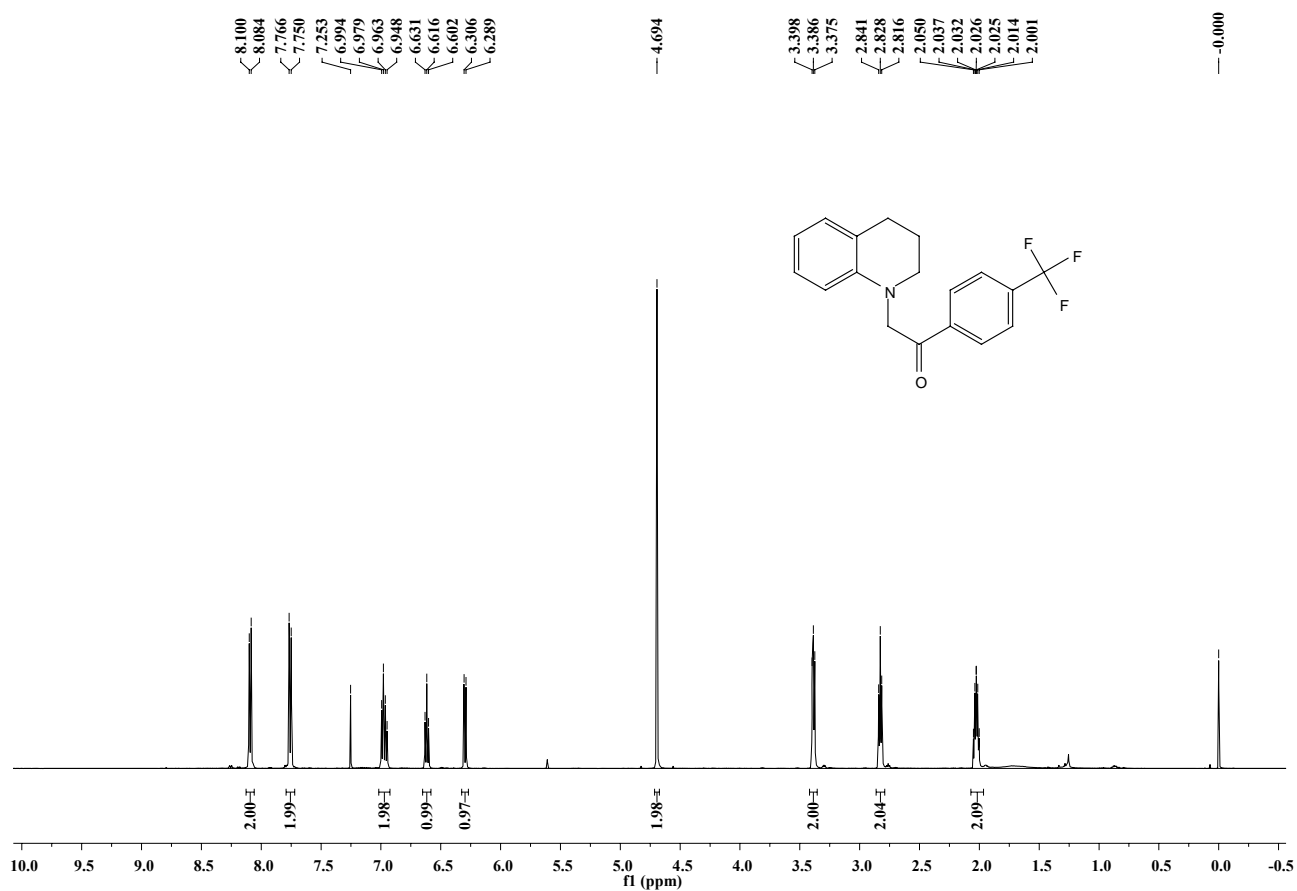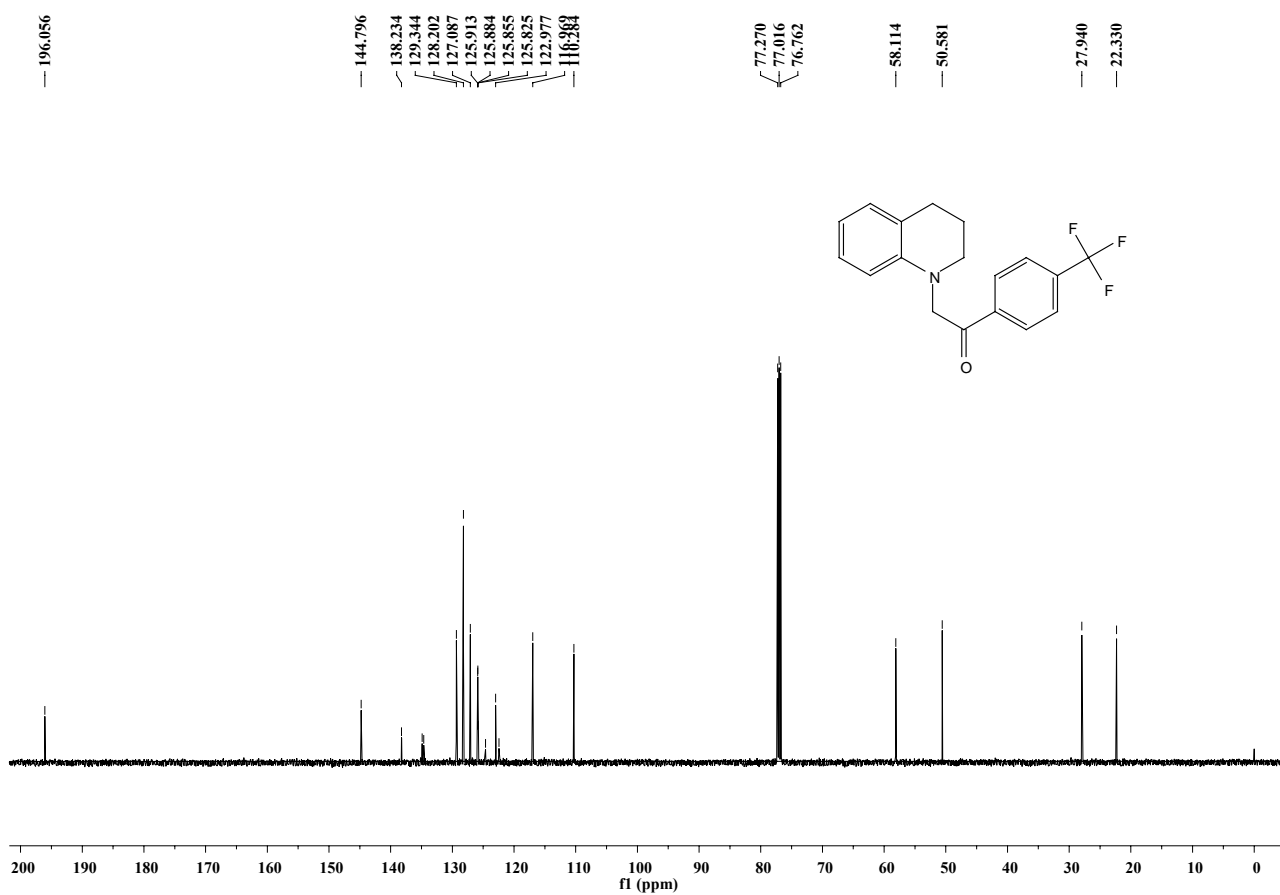

1-(benzofuran-2-yl)-2-(3,4-dihydroquinolin-1(2H)-yl)ethanone (11)

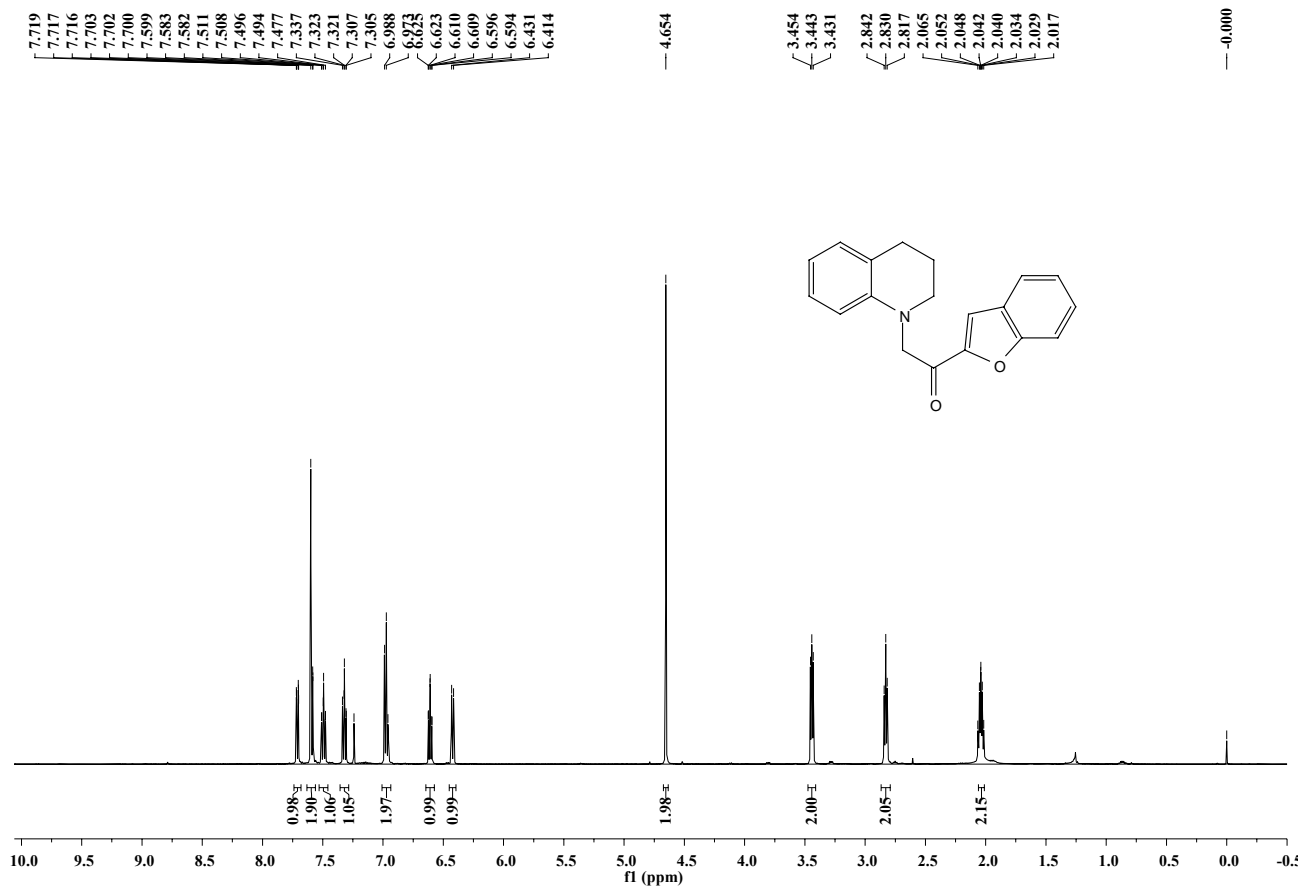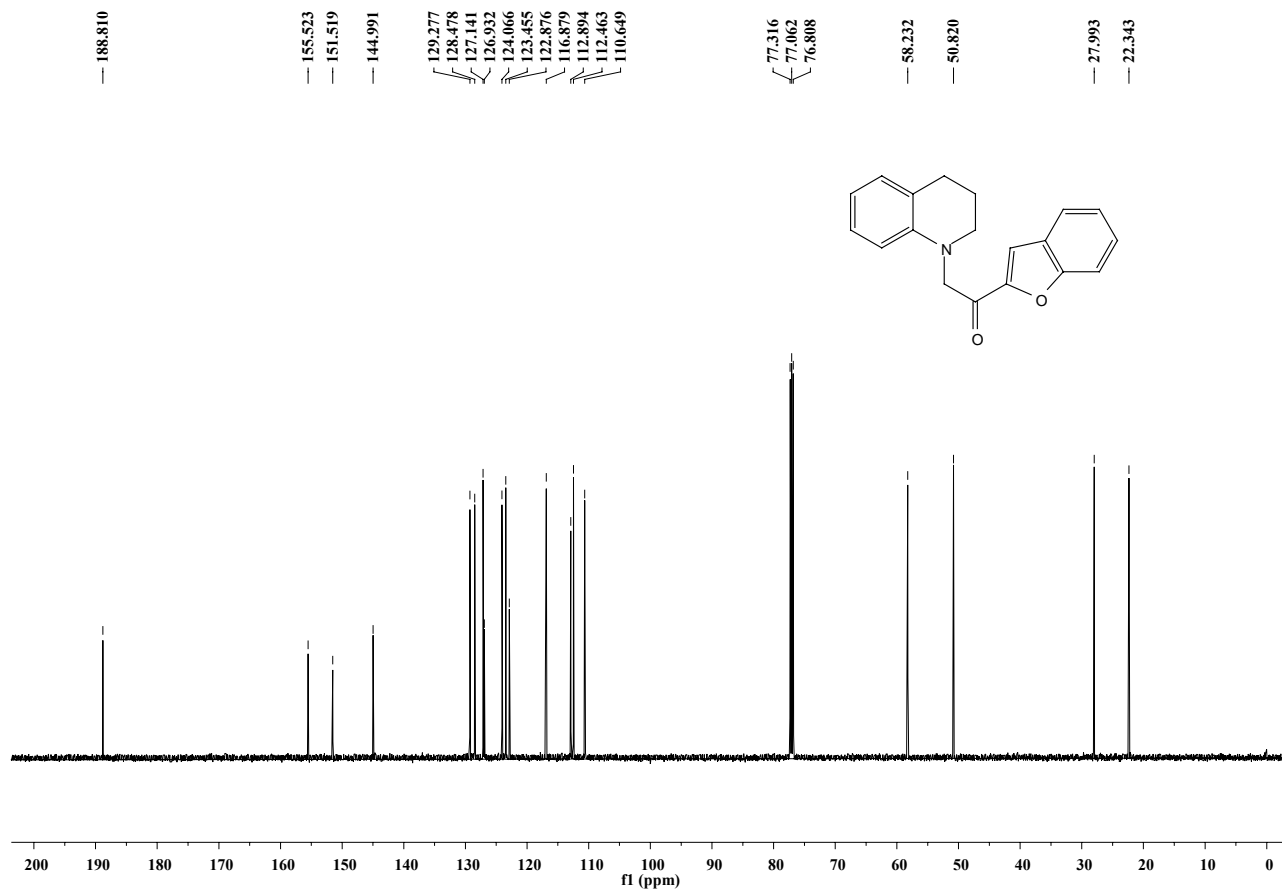

# 1-phenyl-2-(2,2,4,7-tetramethyl-3,4-dihydroquinolin-1(2H)-yl)ethanone (1q)

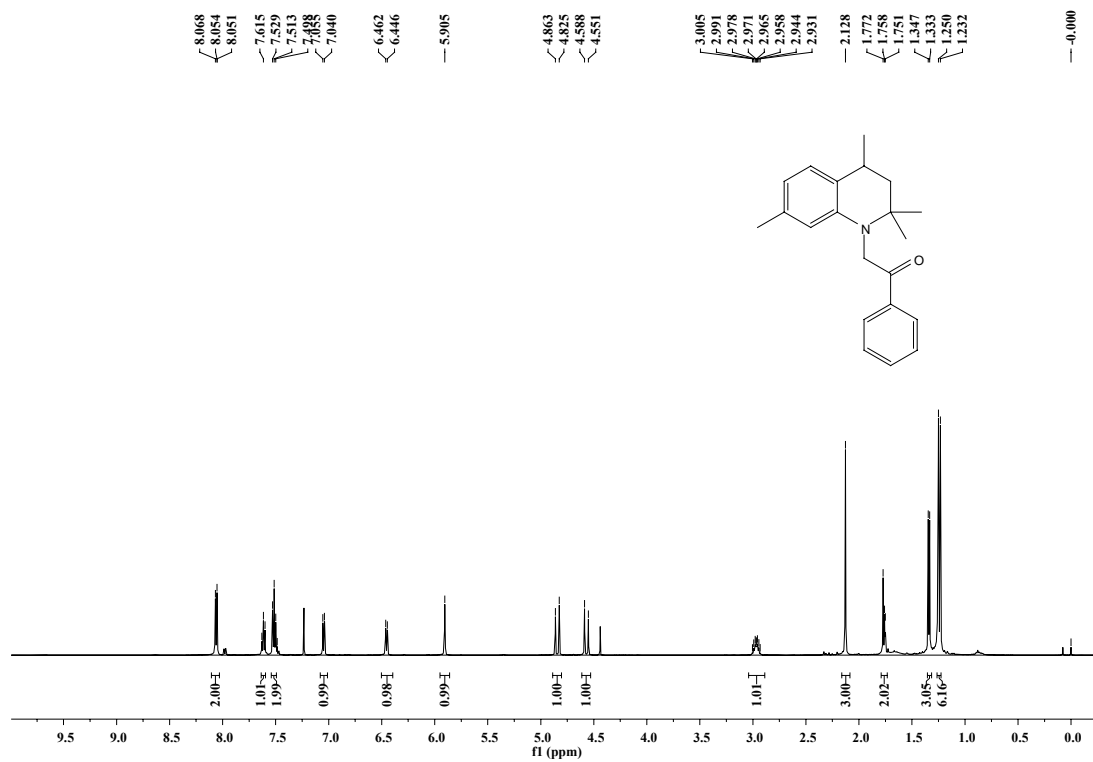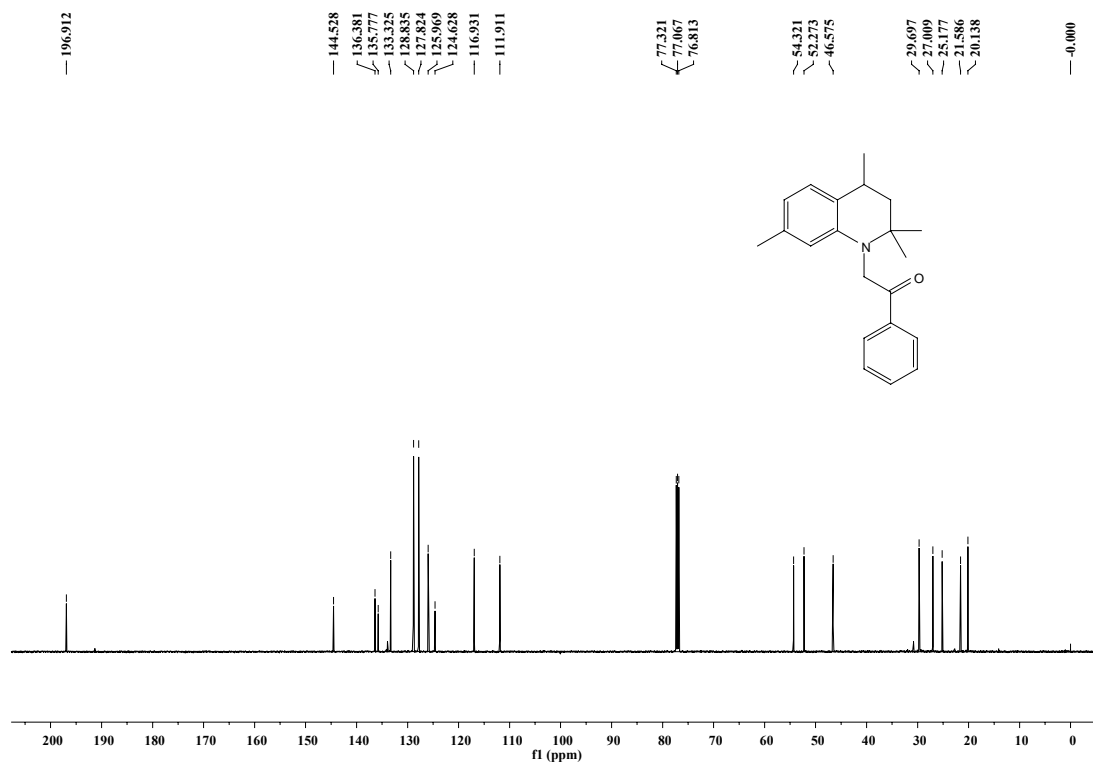

# 1-phenyl-5,6-dihydro-4H-pyrrolo[3,2,1-ij]quinoline (2a)

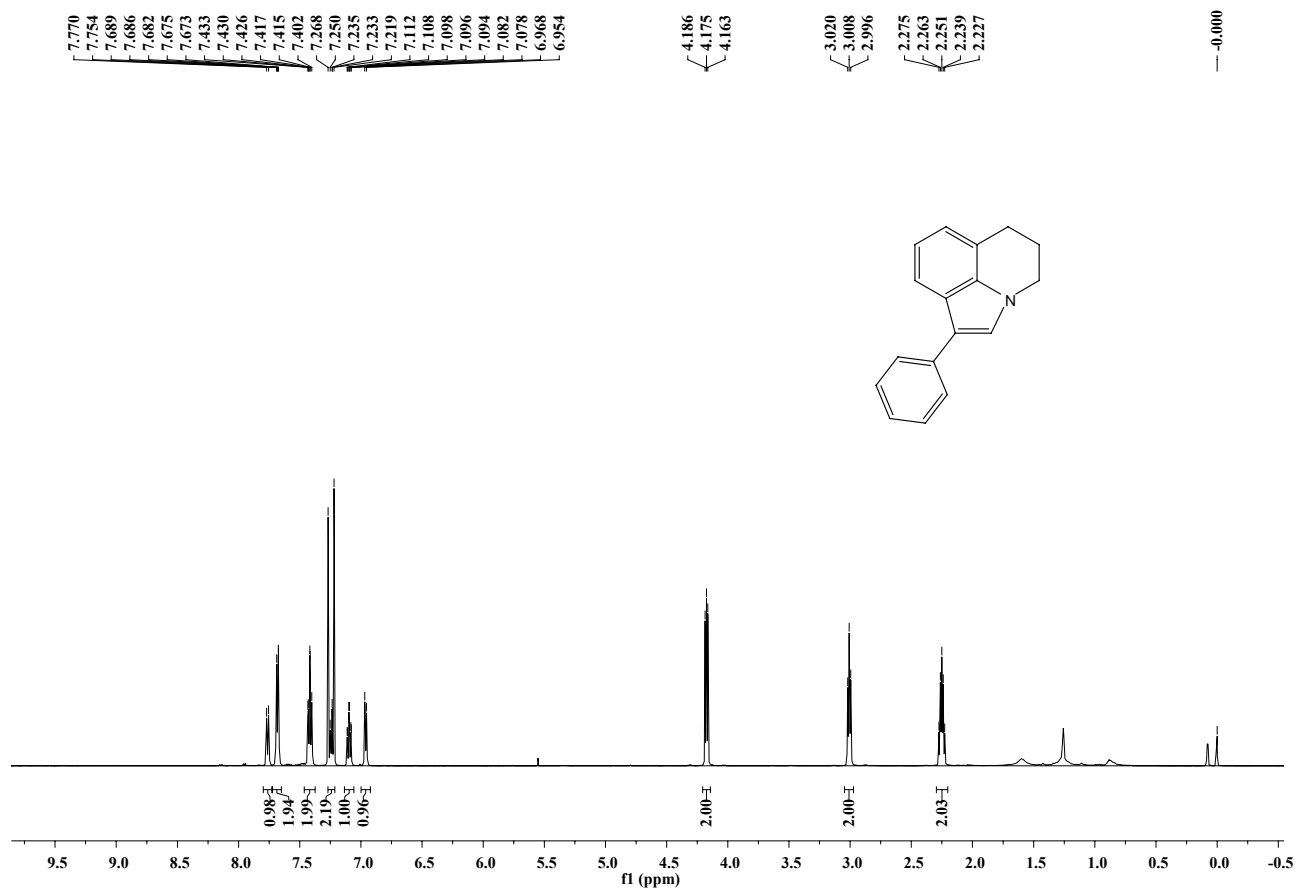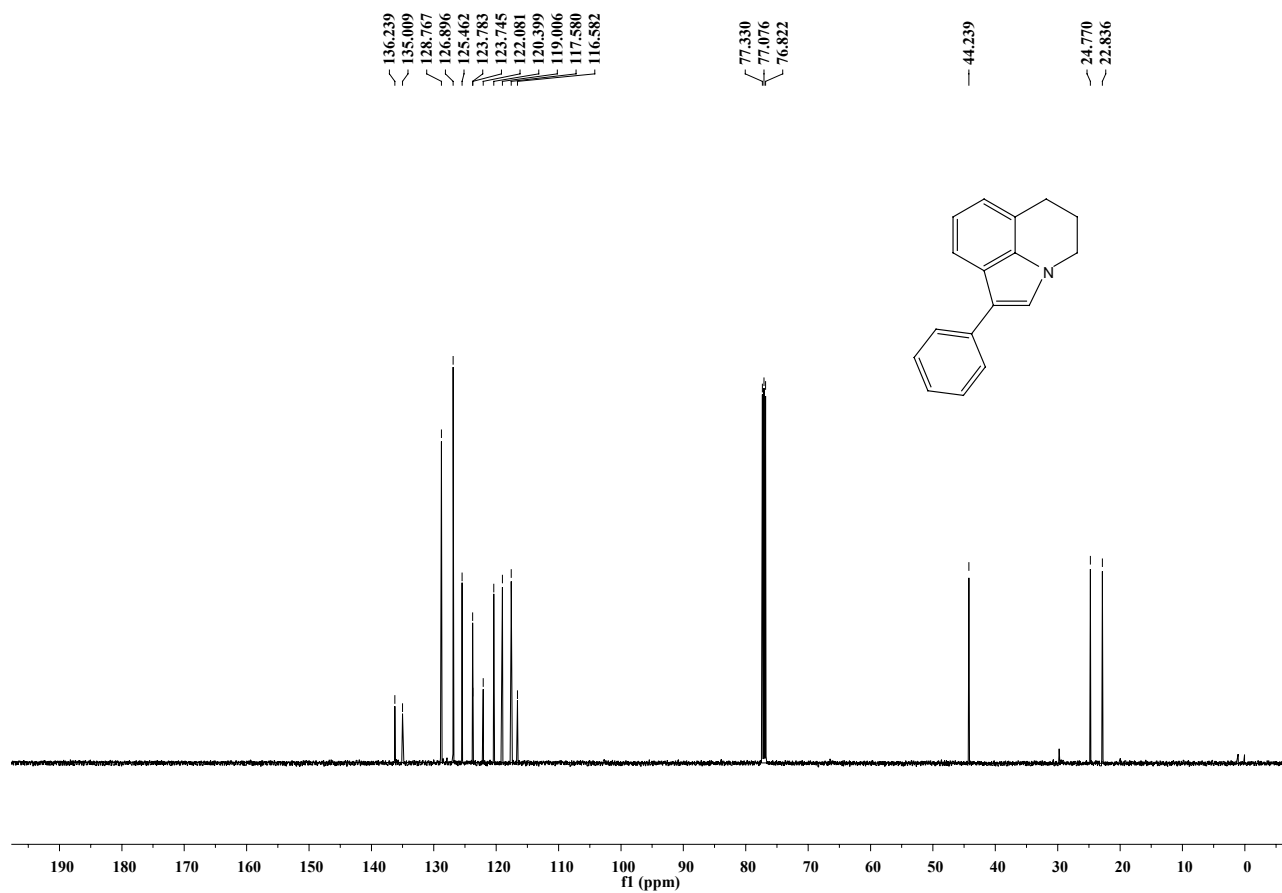



# 1-(p-tolyl)-5,6-dihydro-4H-pyrrolo[3,2,1-ij]quinoline (2b)

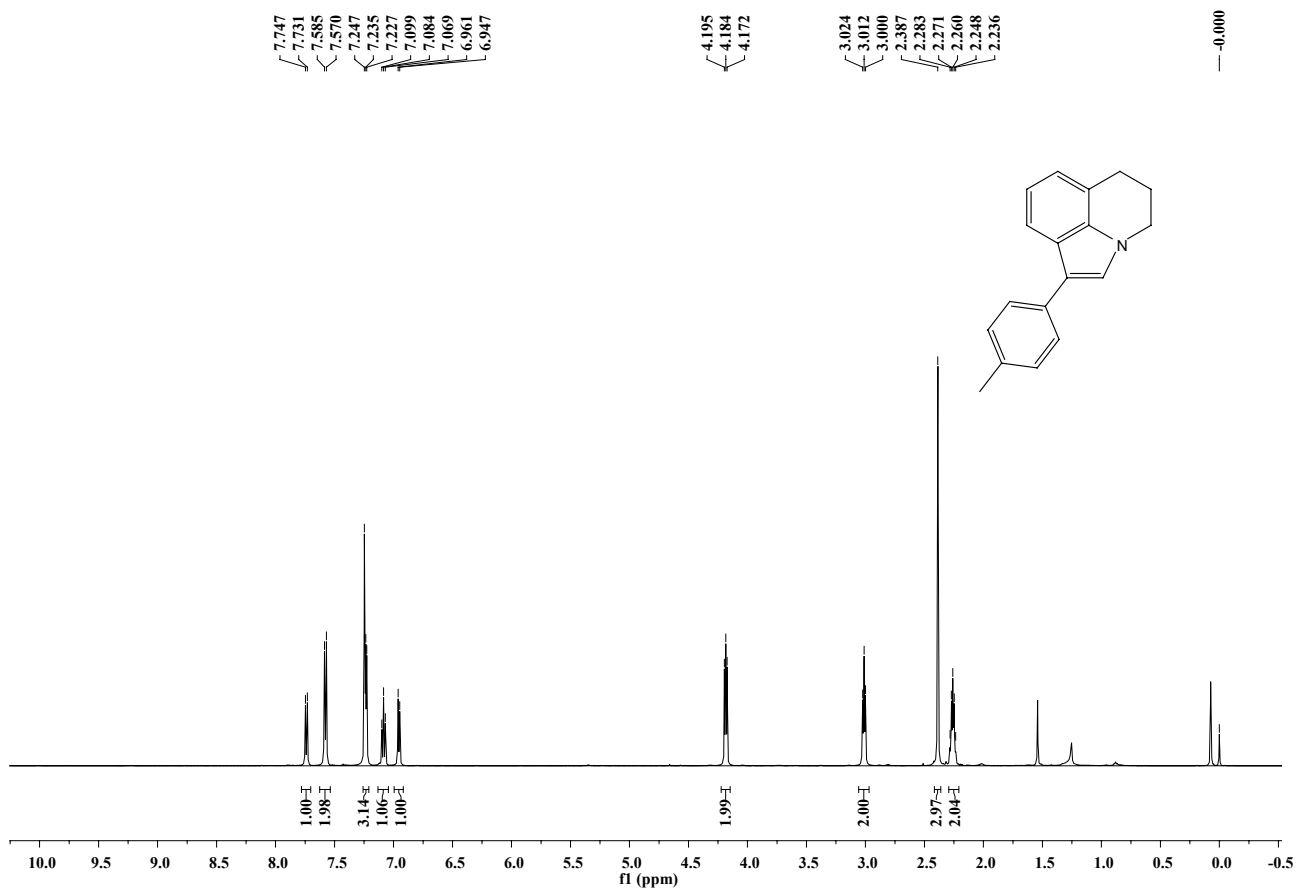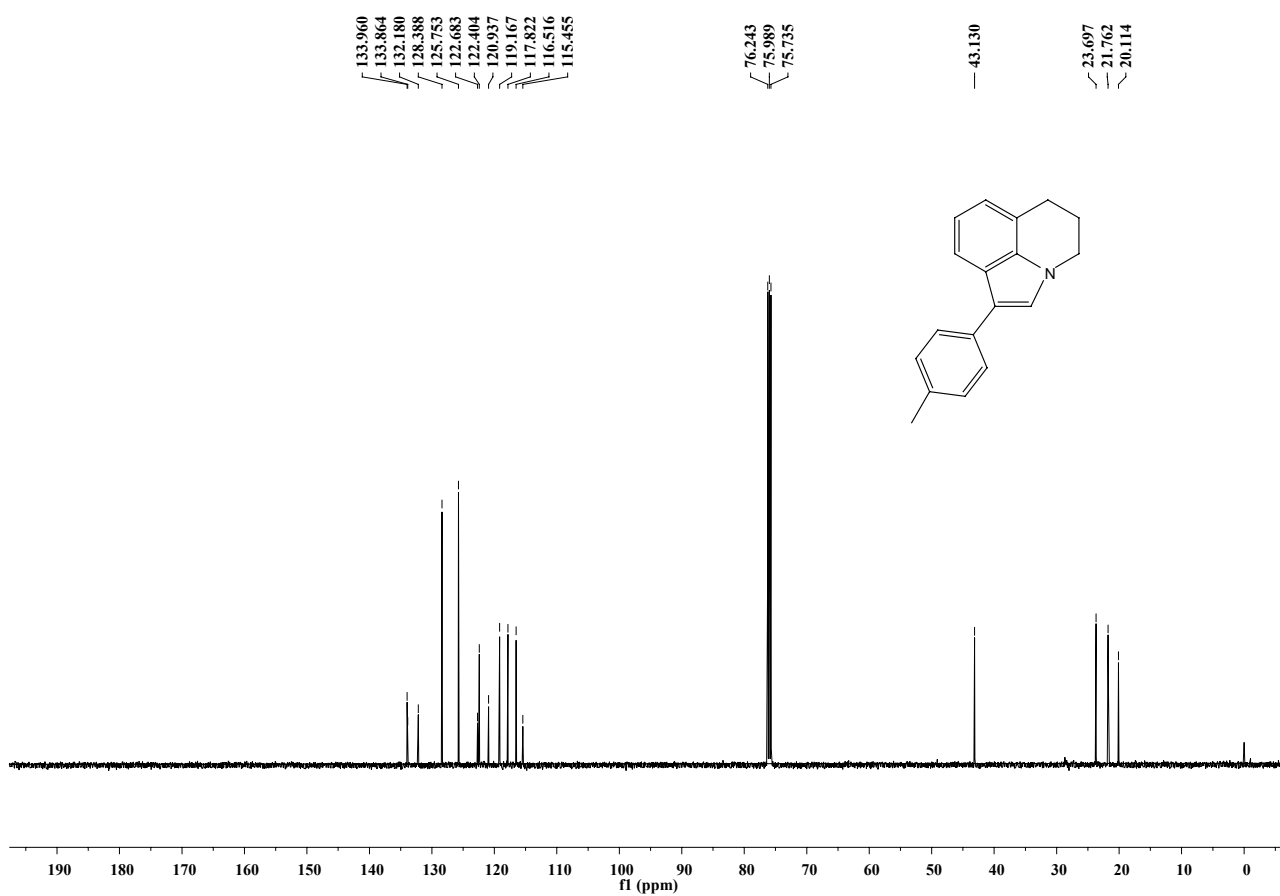

# 1-(4-methoxyphenyl)-5,6-dihydro-4H-pyrrolo[3,2,1-ij]quinoline (2c)

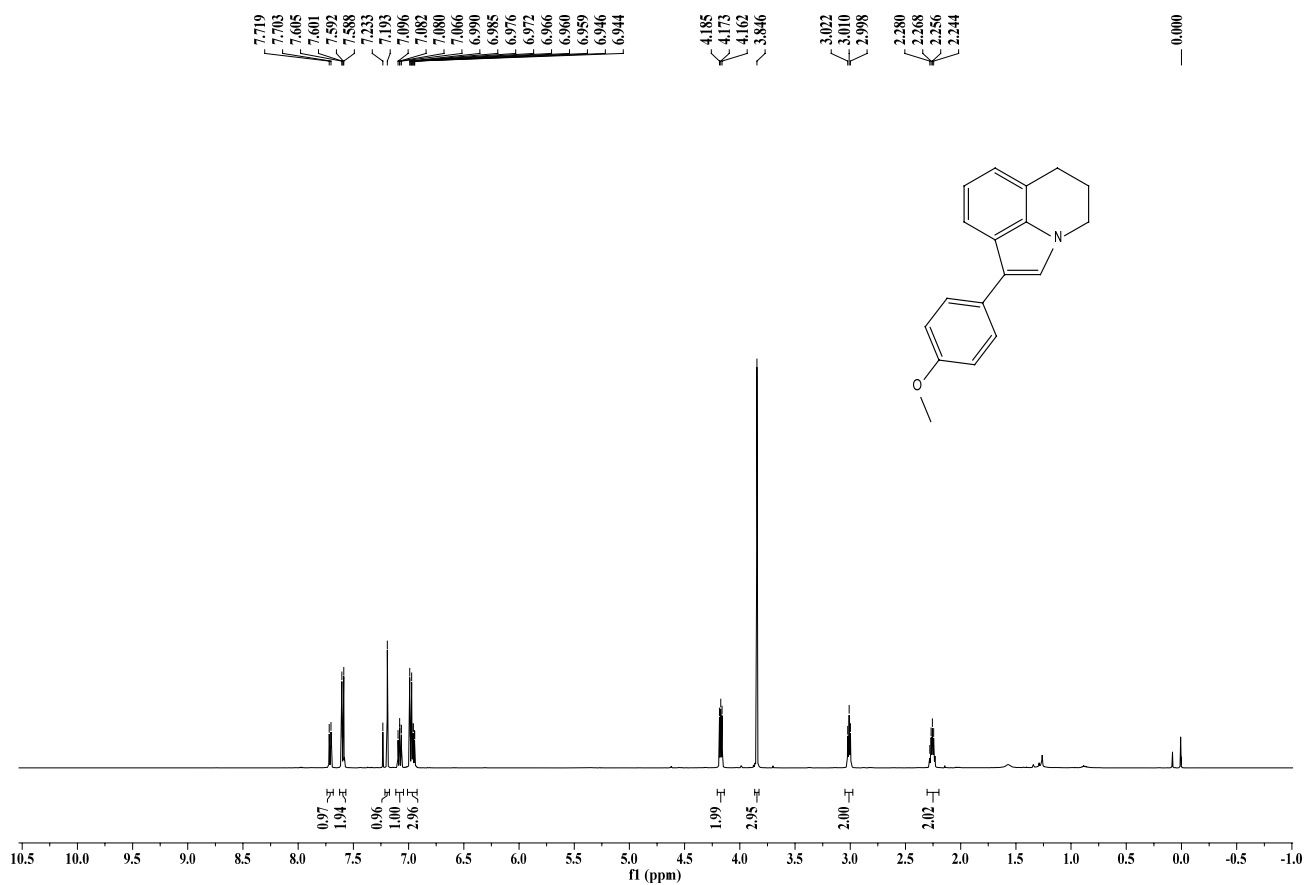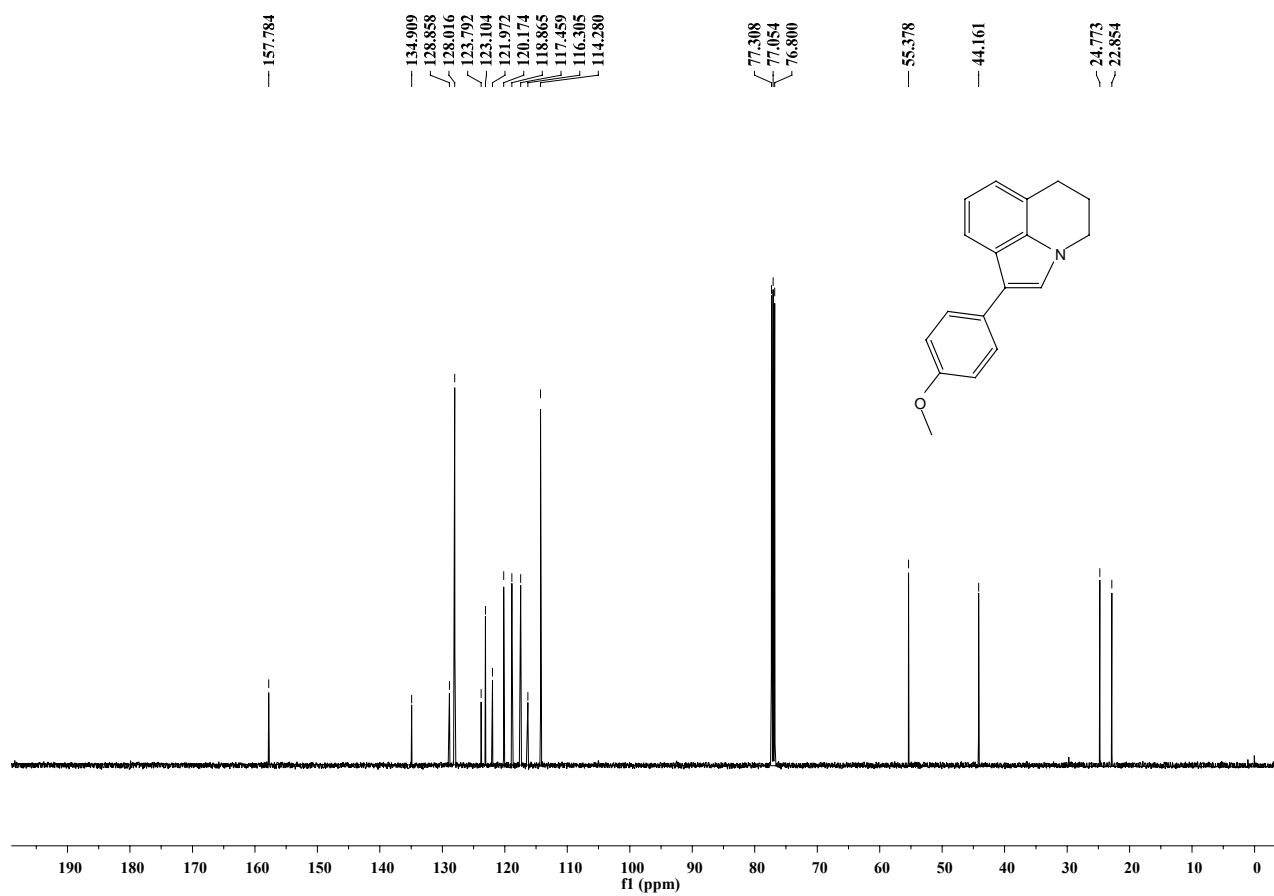

# 1-(4-bromophenyl)-5,6-dihydro-4H-pyrrolo[3,2,1-ij]quinoline (2d)

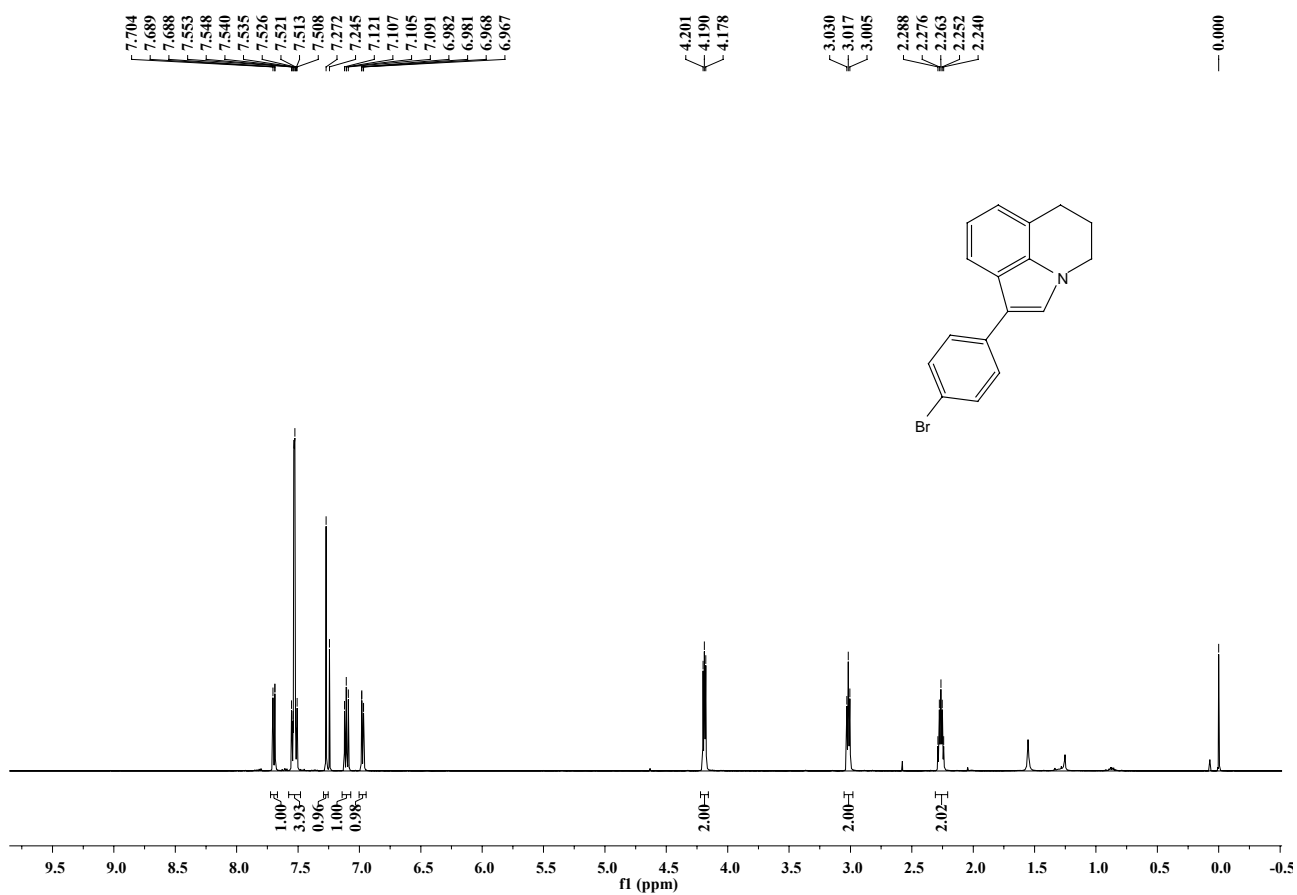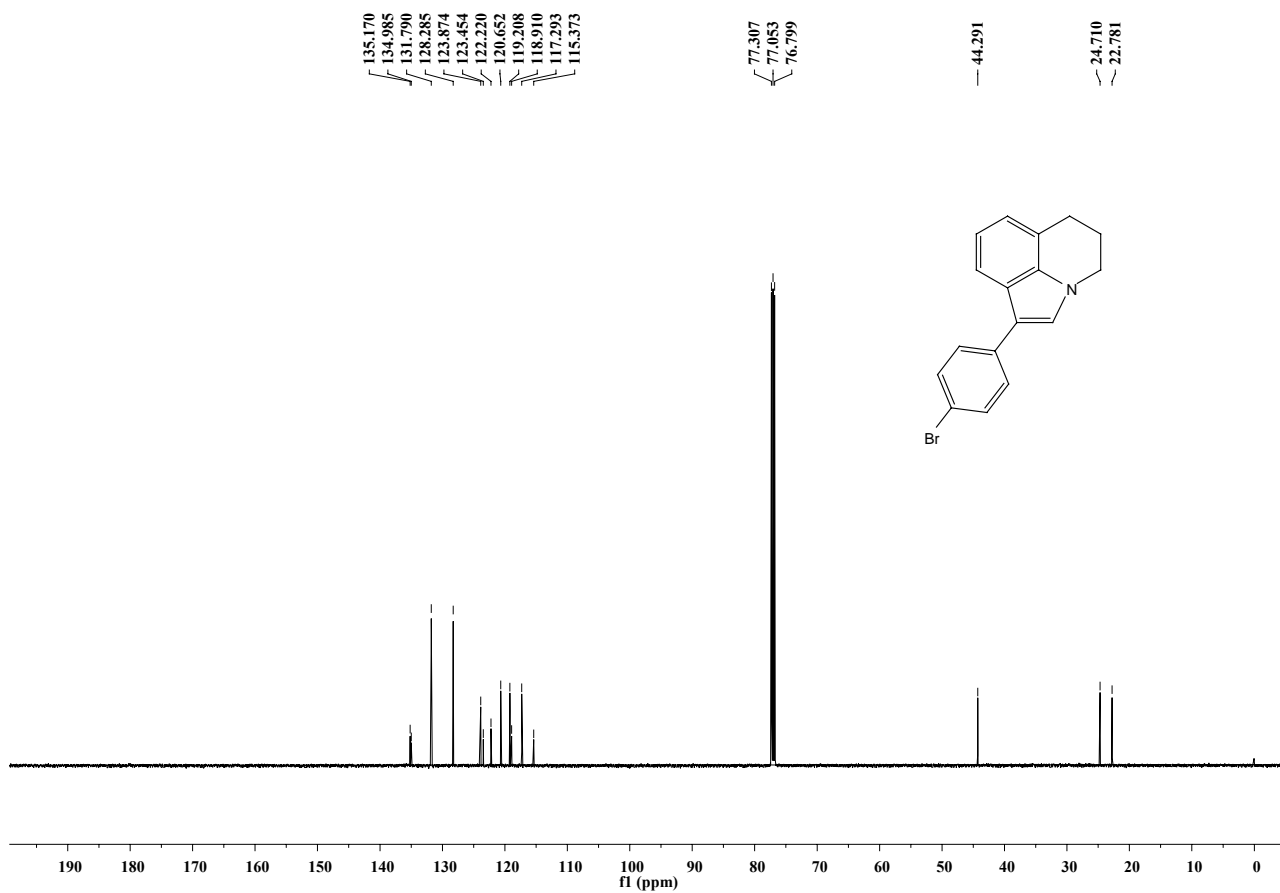

# 1-(4-chlorophenyl)-5,6-dihydro-4H-pyrrolo[3,2,1-ij]quinoline (2e)

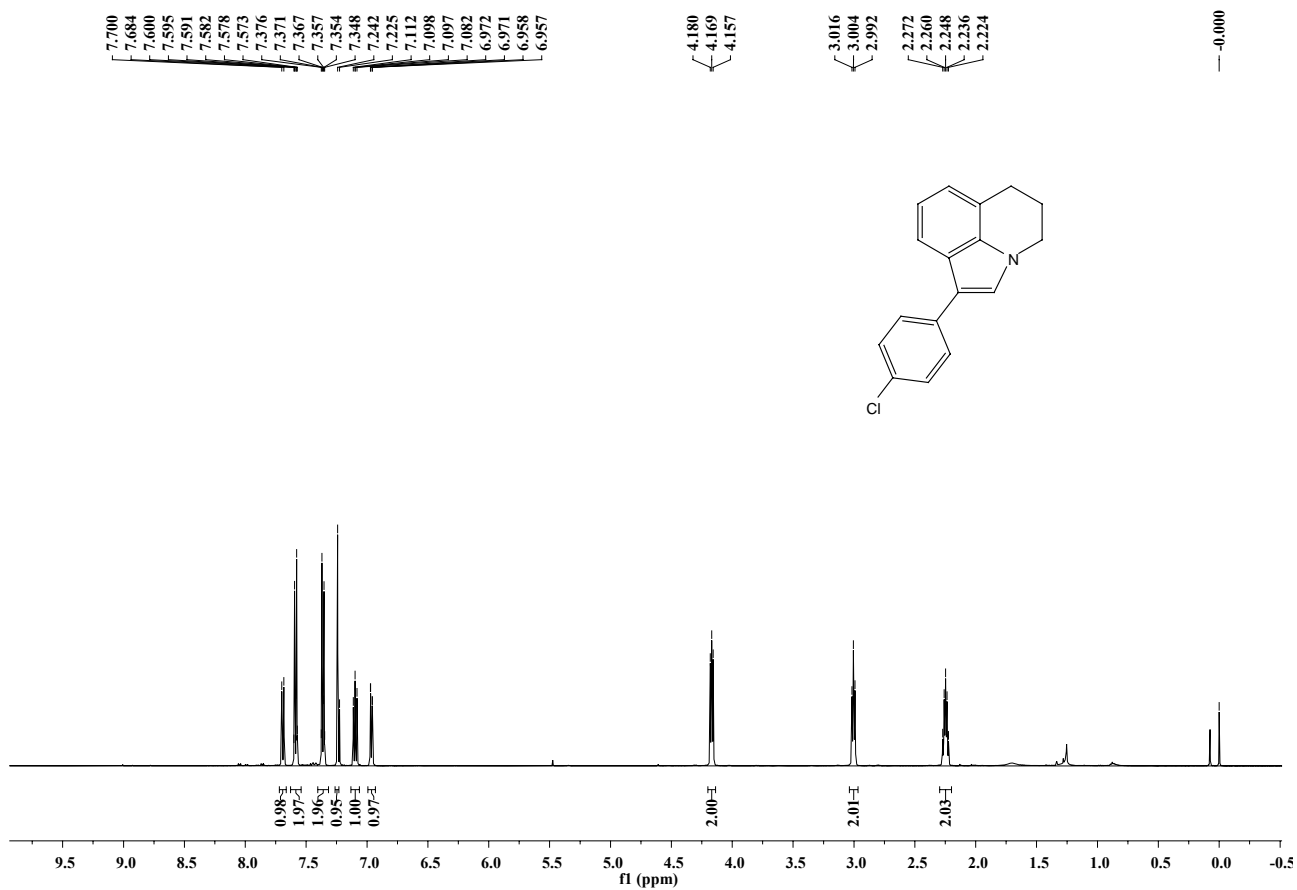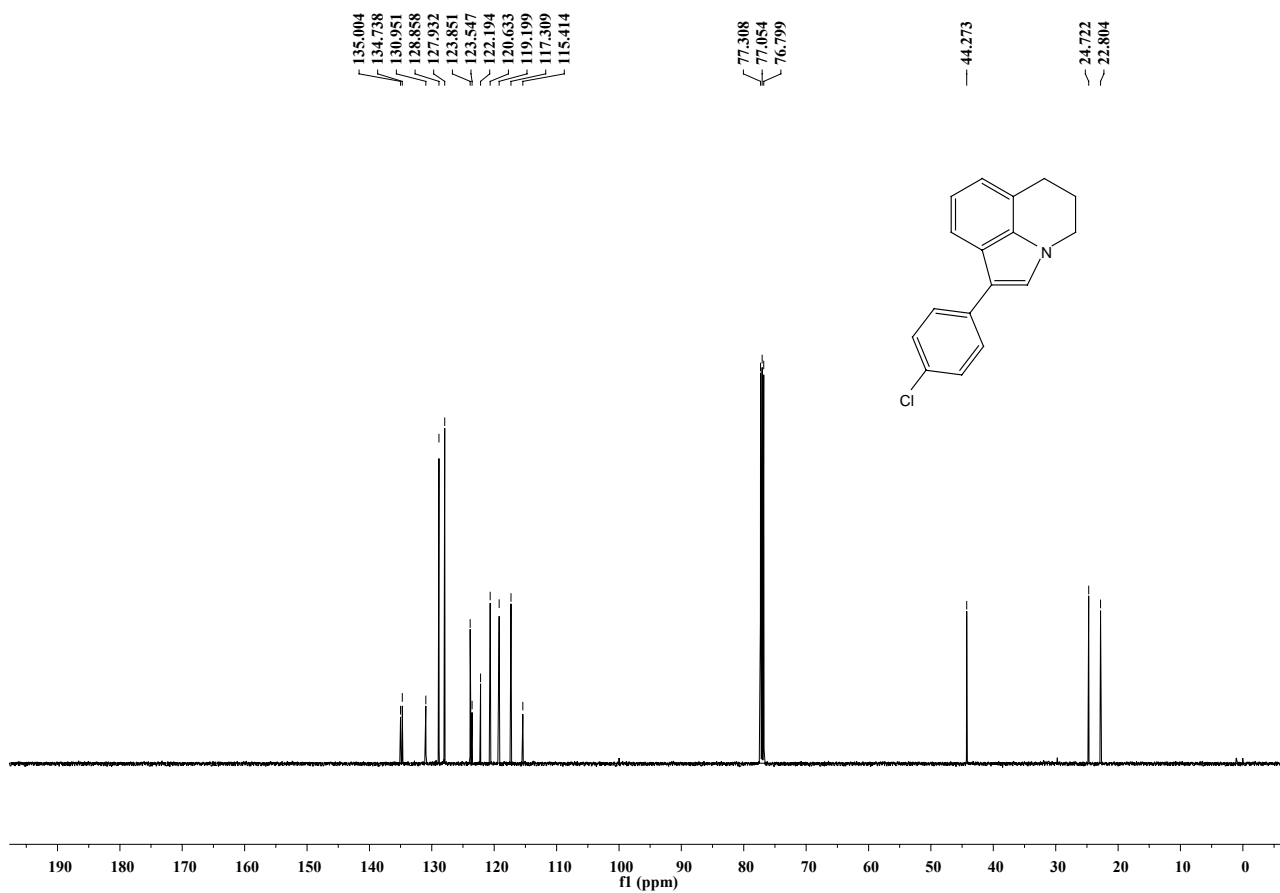

# 1-(4-fluorophenyl)-5,6-dihydro-4H-pyrrolo[3,2,1-ij]quinoline (2f)

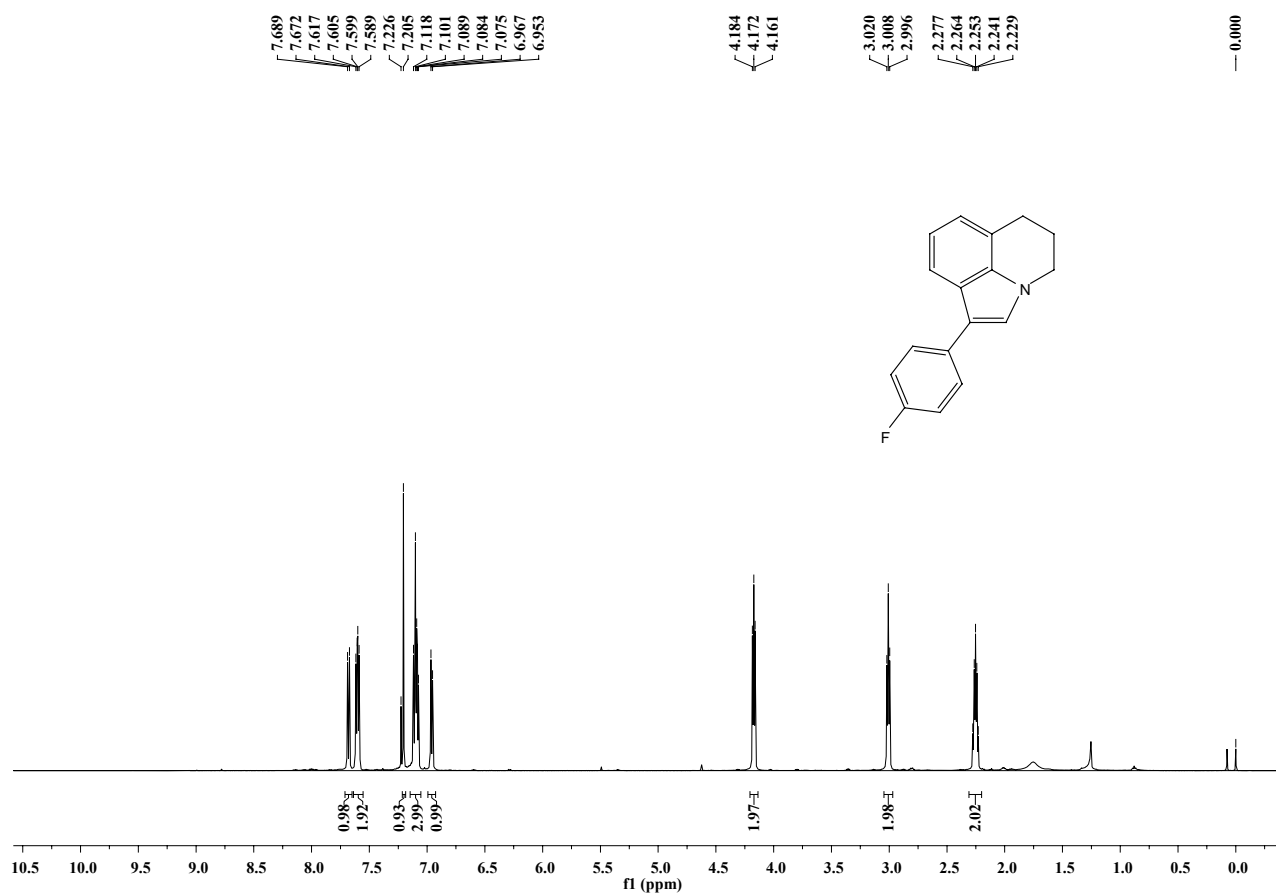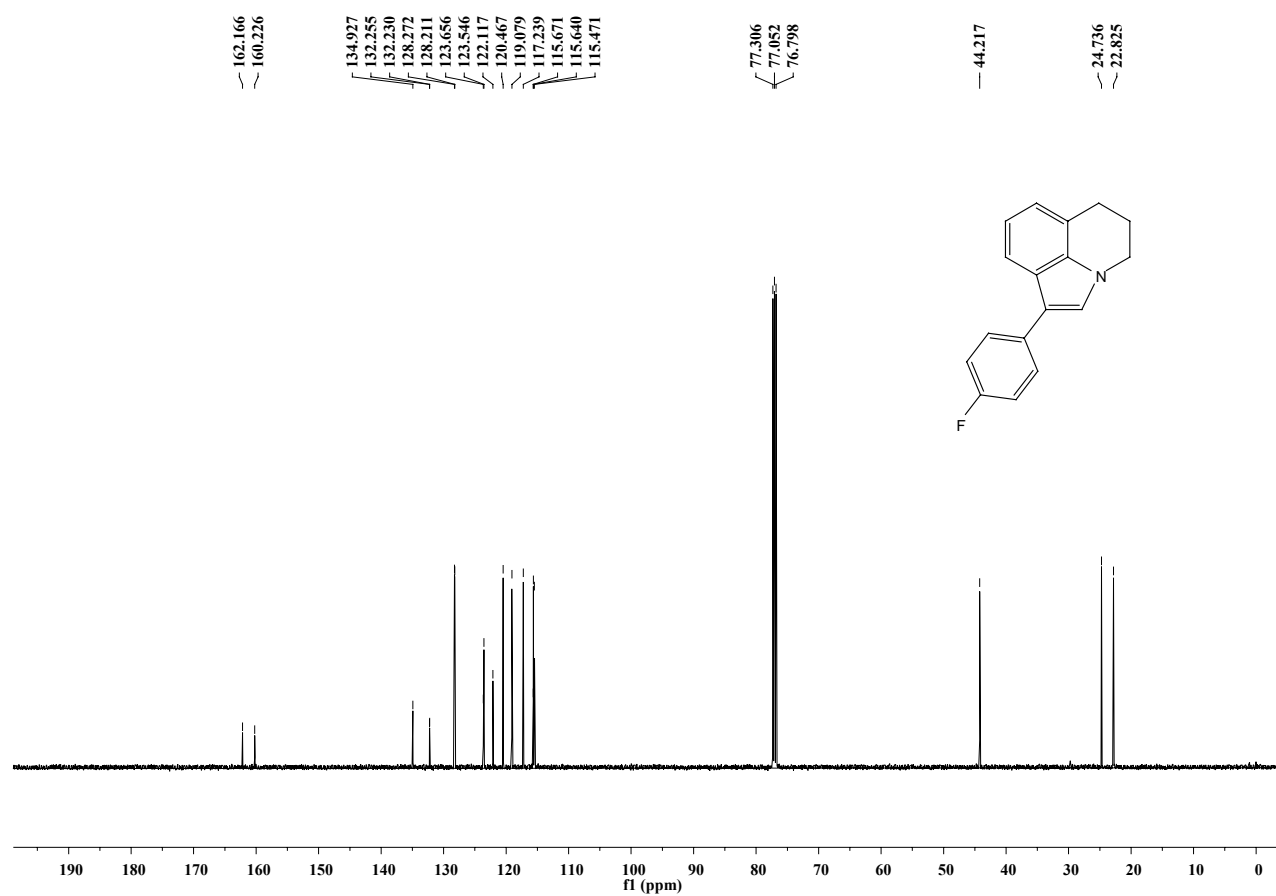

# 1-(3-fluorophenyl)-5,6-dihydro-4H-pyrrolo[3,2,1-ij]quinoline (2g)

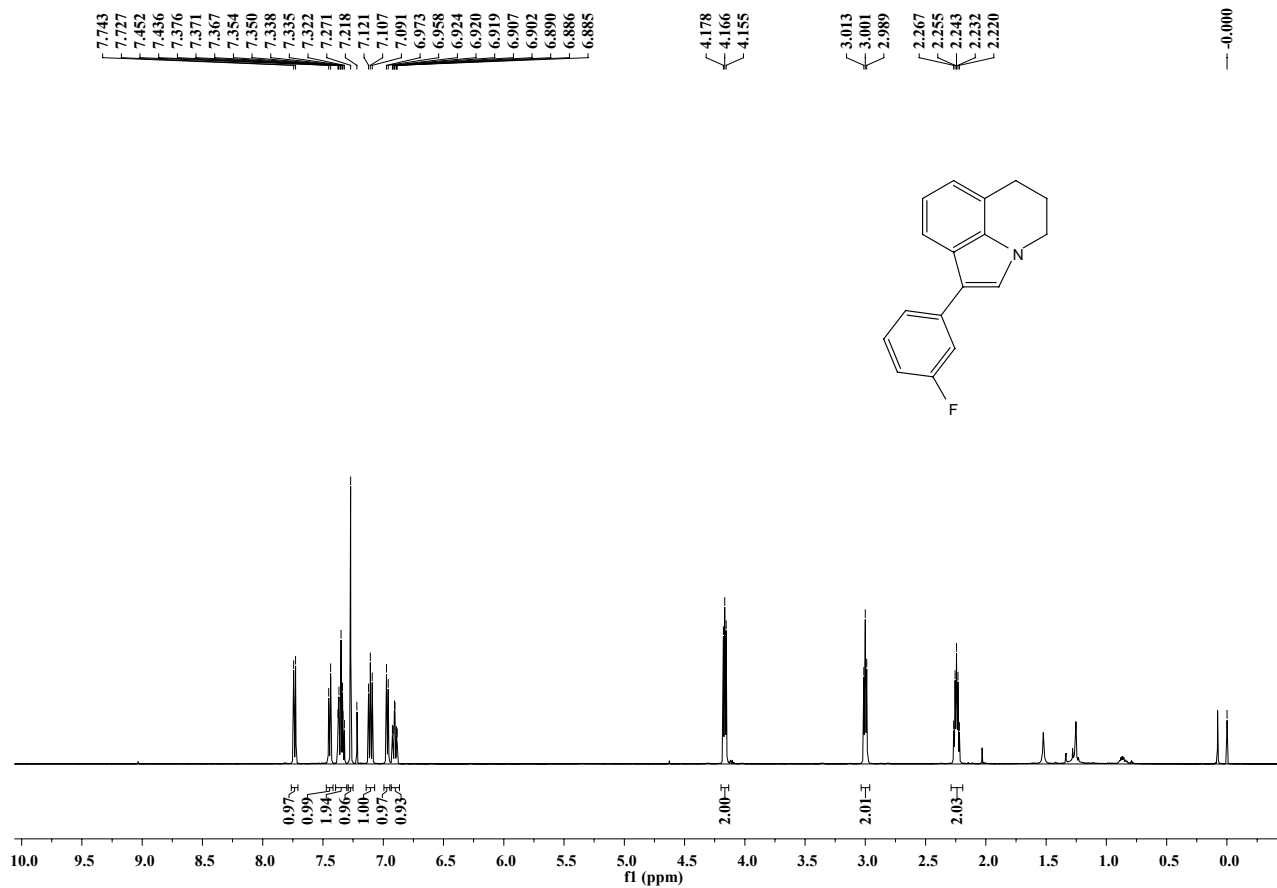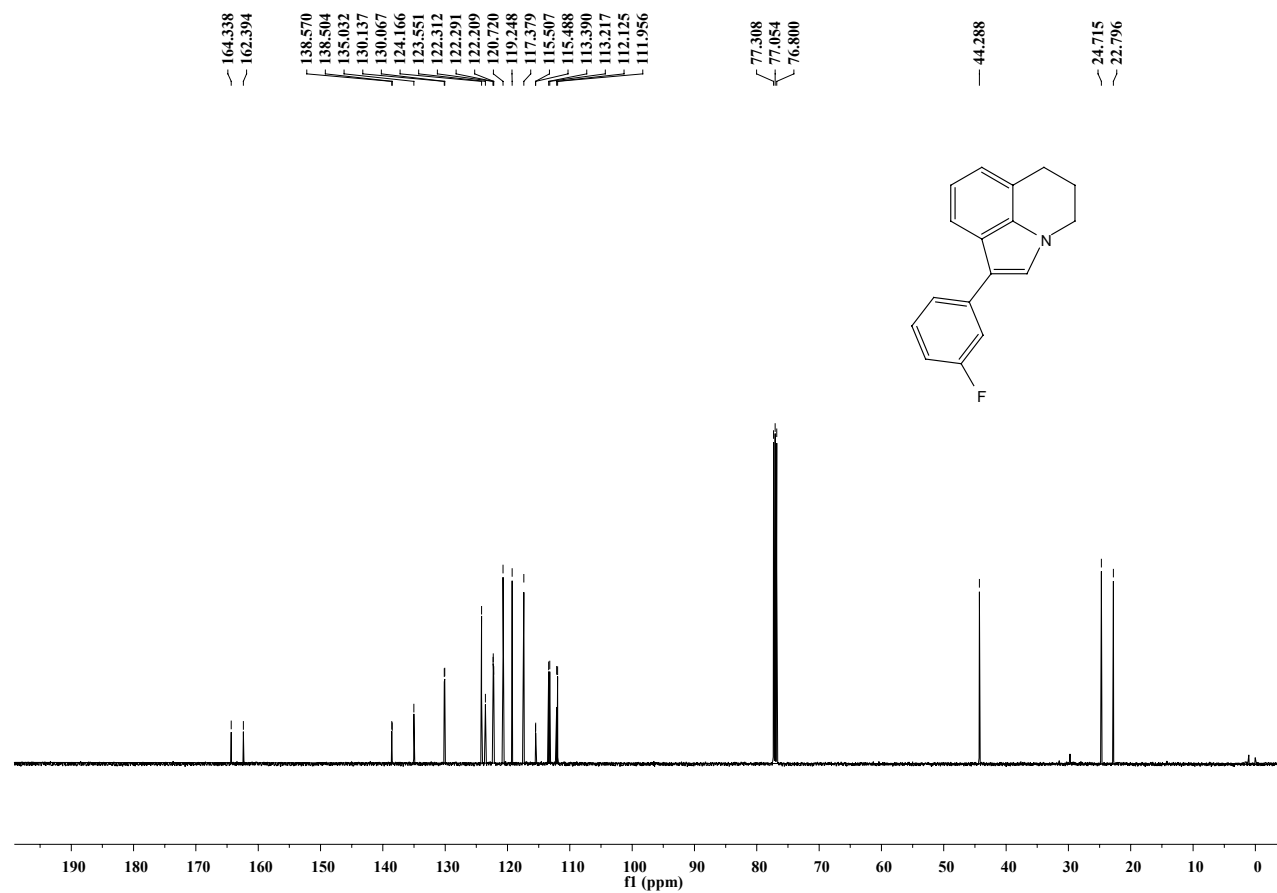

4-(5,6-dihydro-4H-pyrrolo[3,2,1-ij]quinolin-1-yl)benzonitrile (2h)

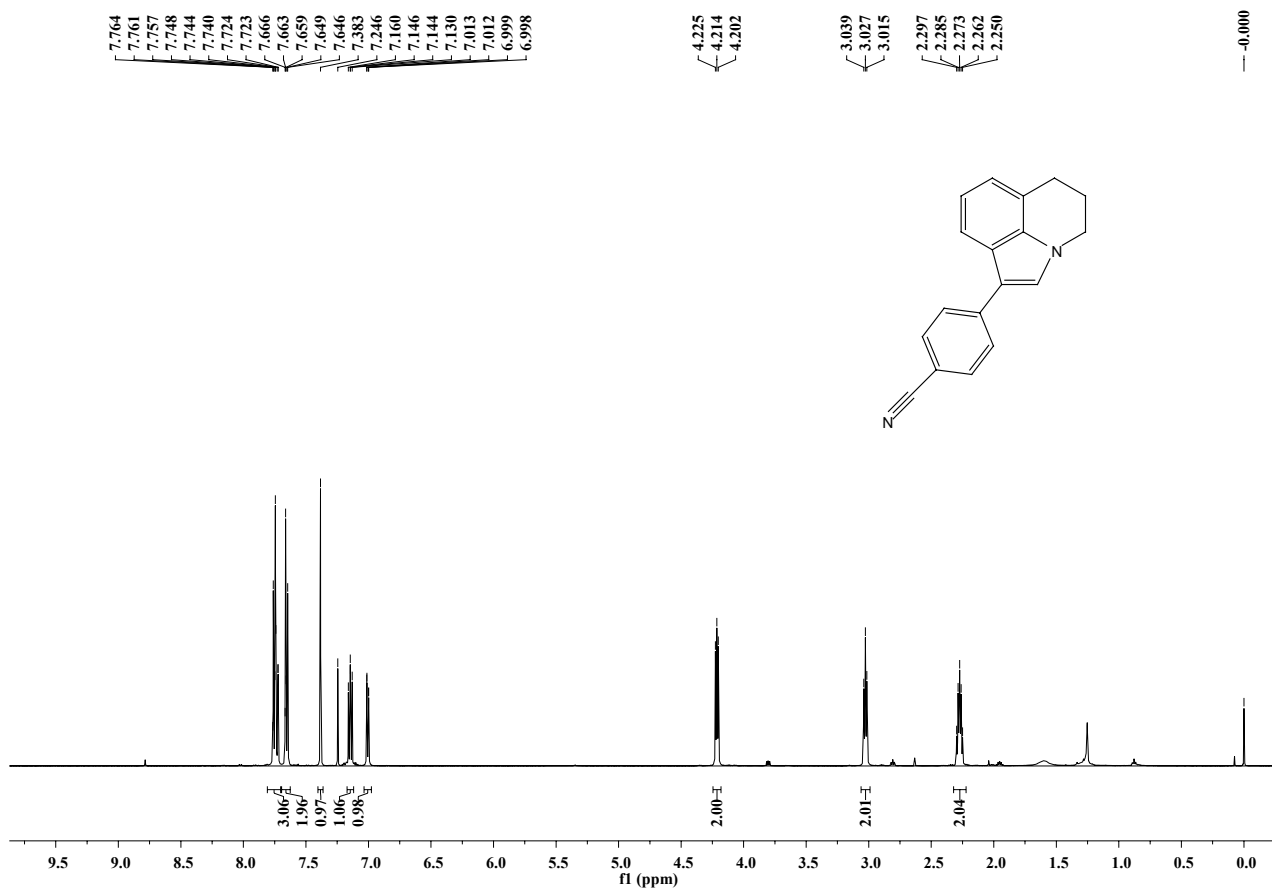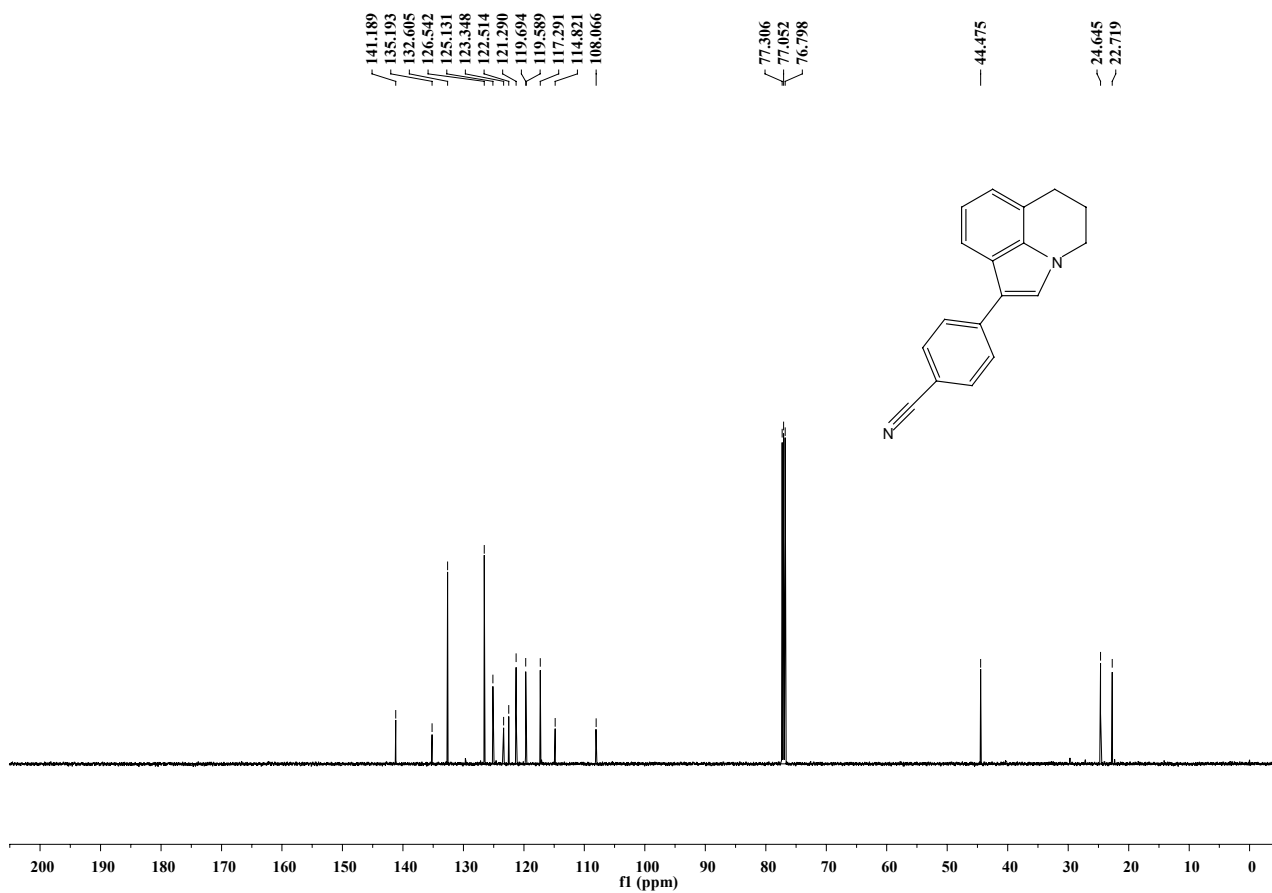

# 1-(4-(trifluoromethyl)phenyl)-5,6-dihydro-4H-pyrrolo[3,2,1-ij]quinoline (2i)

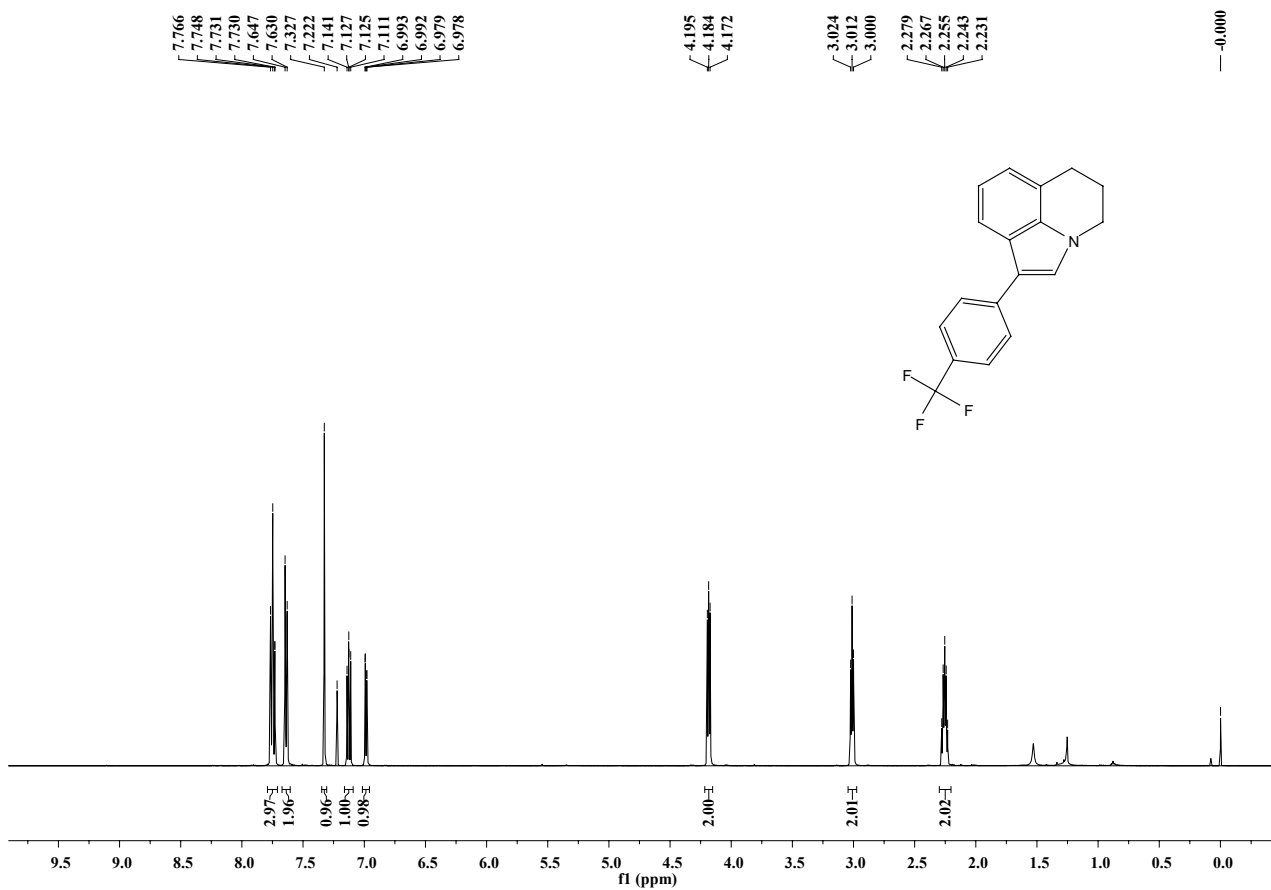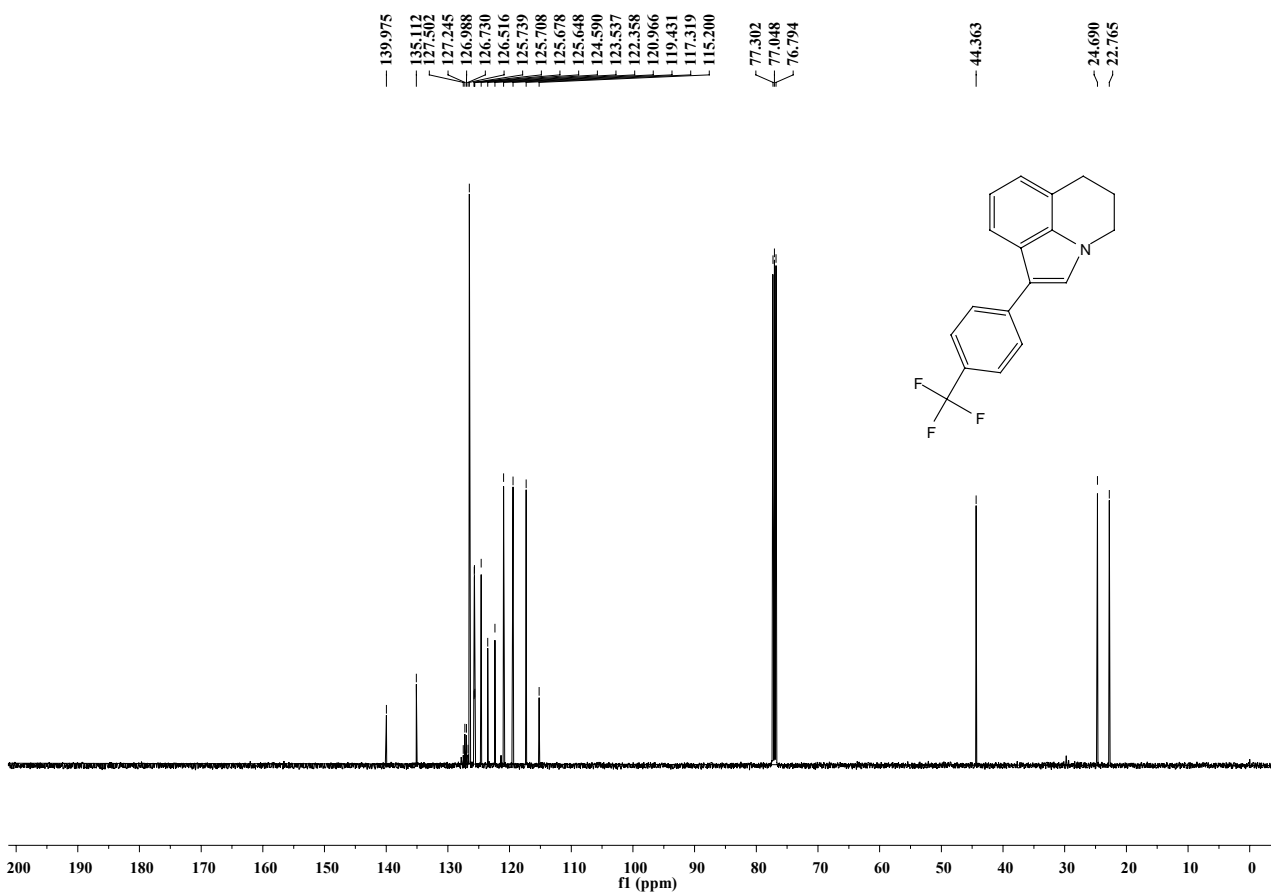



# 1-(3,4-difluorophenyl)-5,6-dihydro-4H-pyrrolo[3,2,1-ij]quinoline (2j)

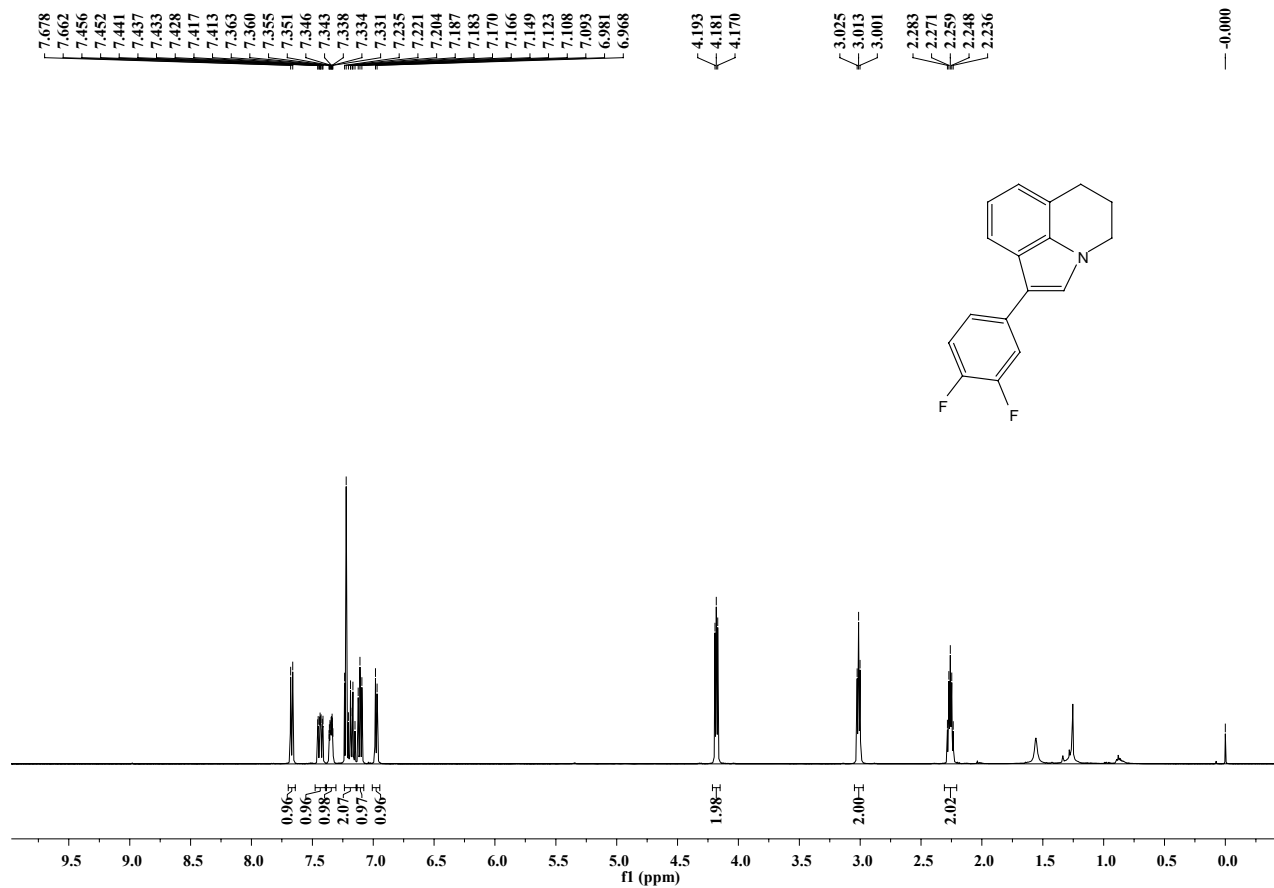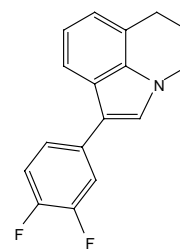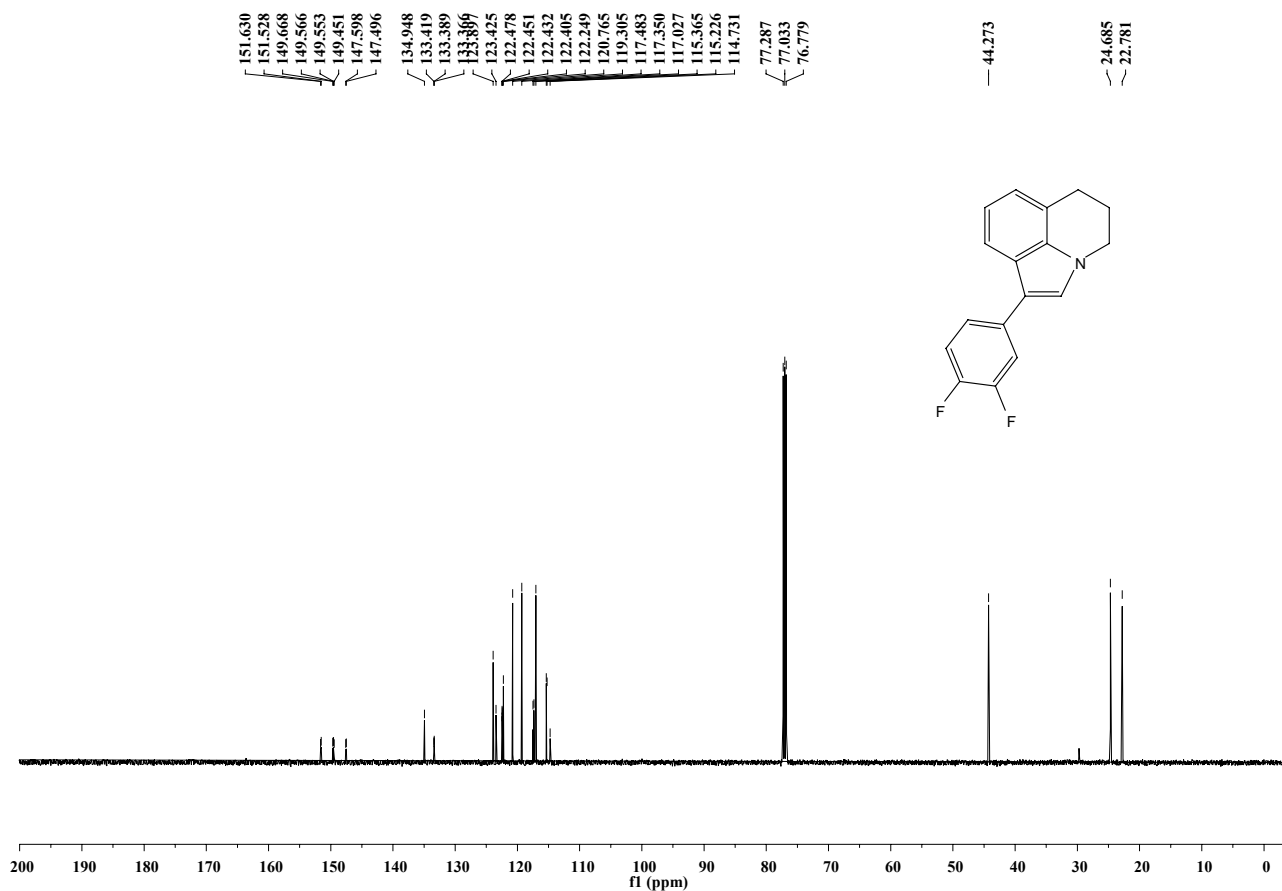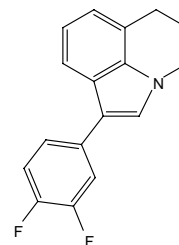

# 1-(naphthalen-2-yl)-5,6-dihydro-4H-pyrrolo[3,2,1-ij]quinoline (2k)

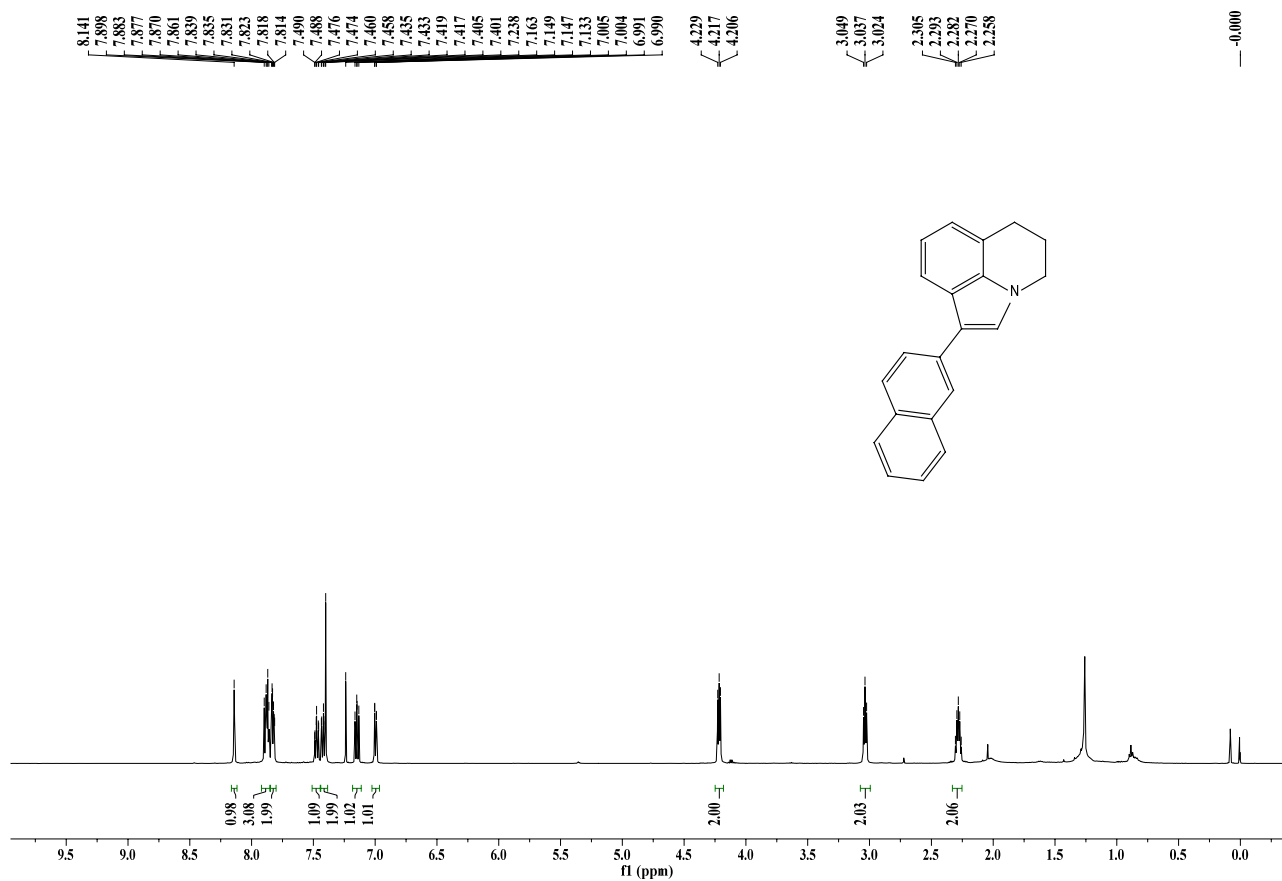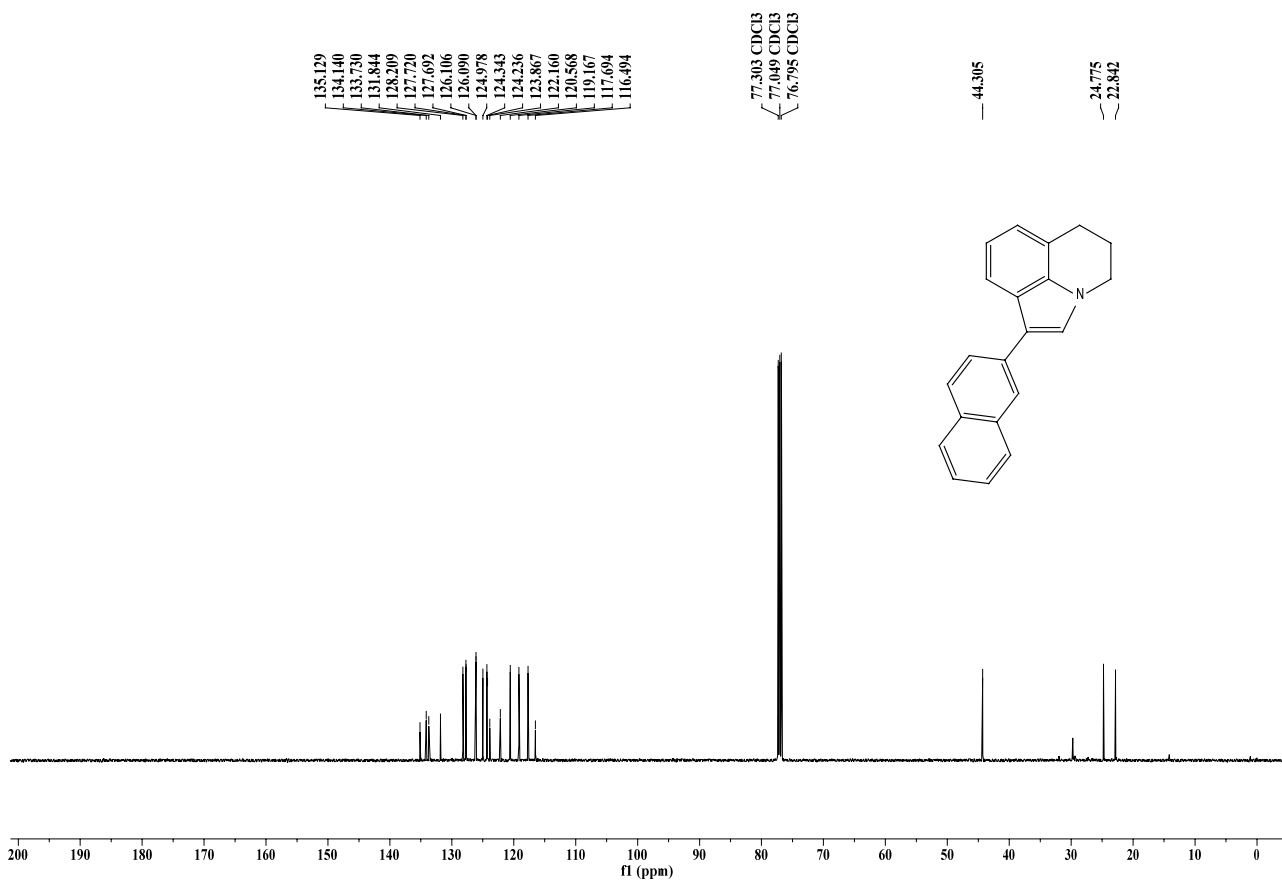

1-(3a,7a-dihydrobenzofuran-2-yl)-5,6-dihydro-4H-pyrrolo[3,2,1-ij]quinoline (2l)

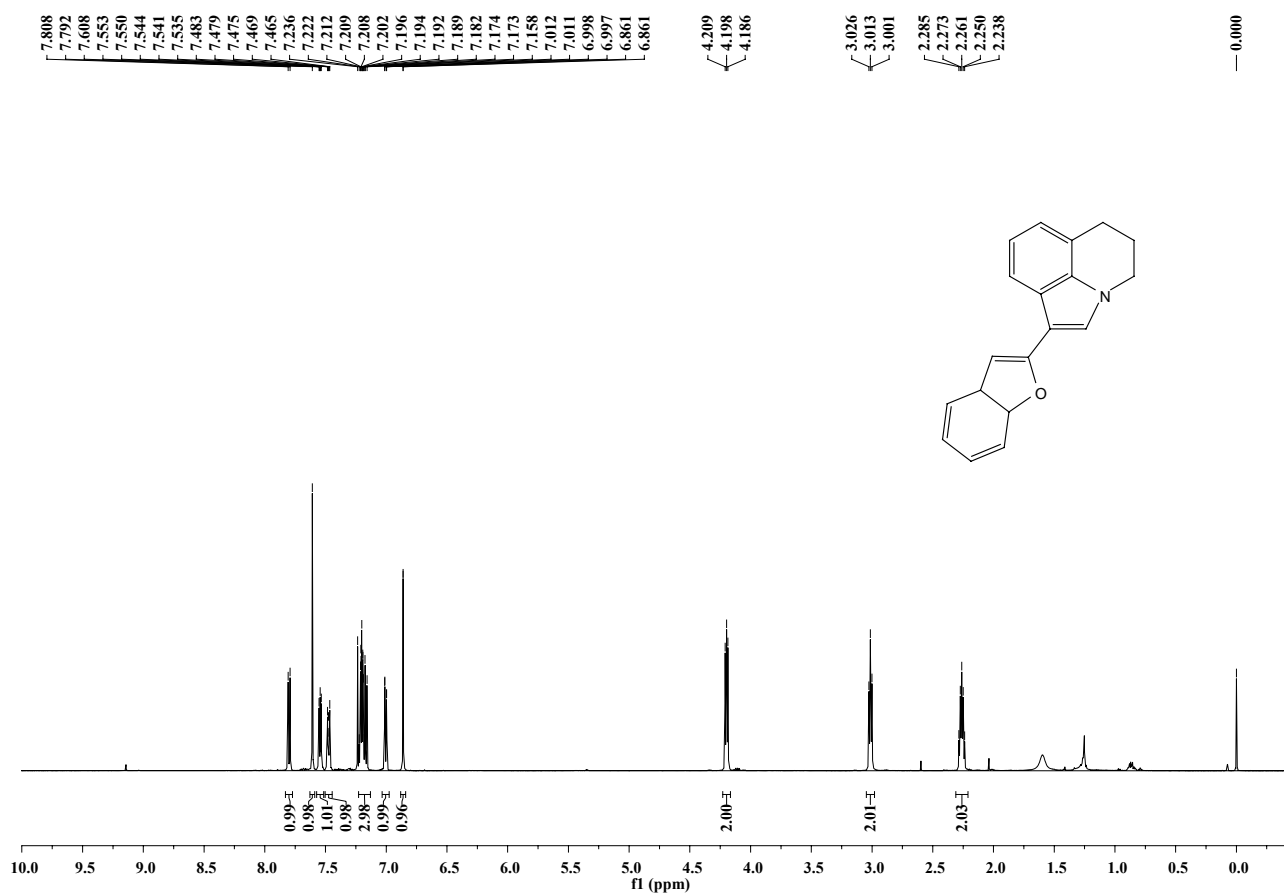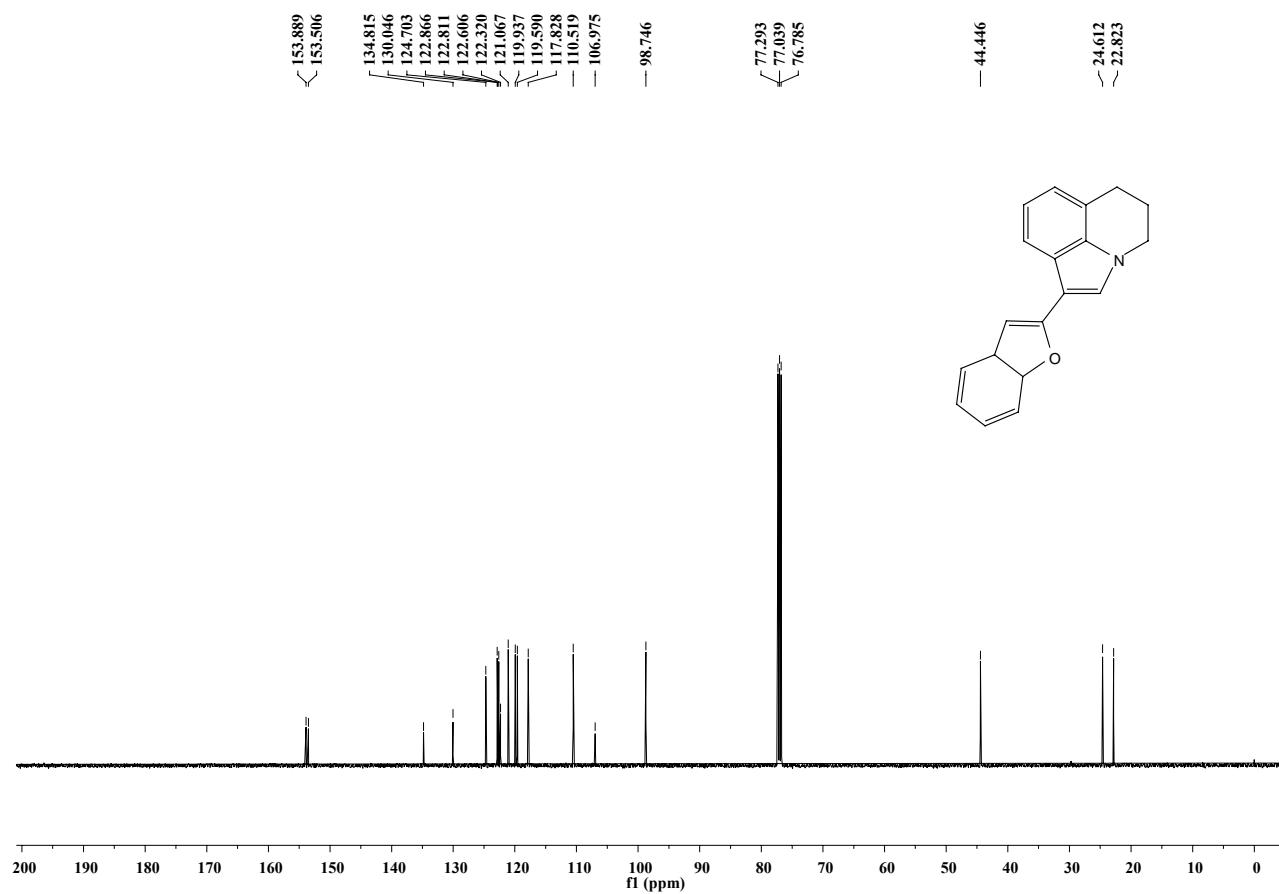

# 1-ethyl-5,6-dihydro-4H-pyrrolo[3,2,1-ij]quinoline (2m)

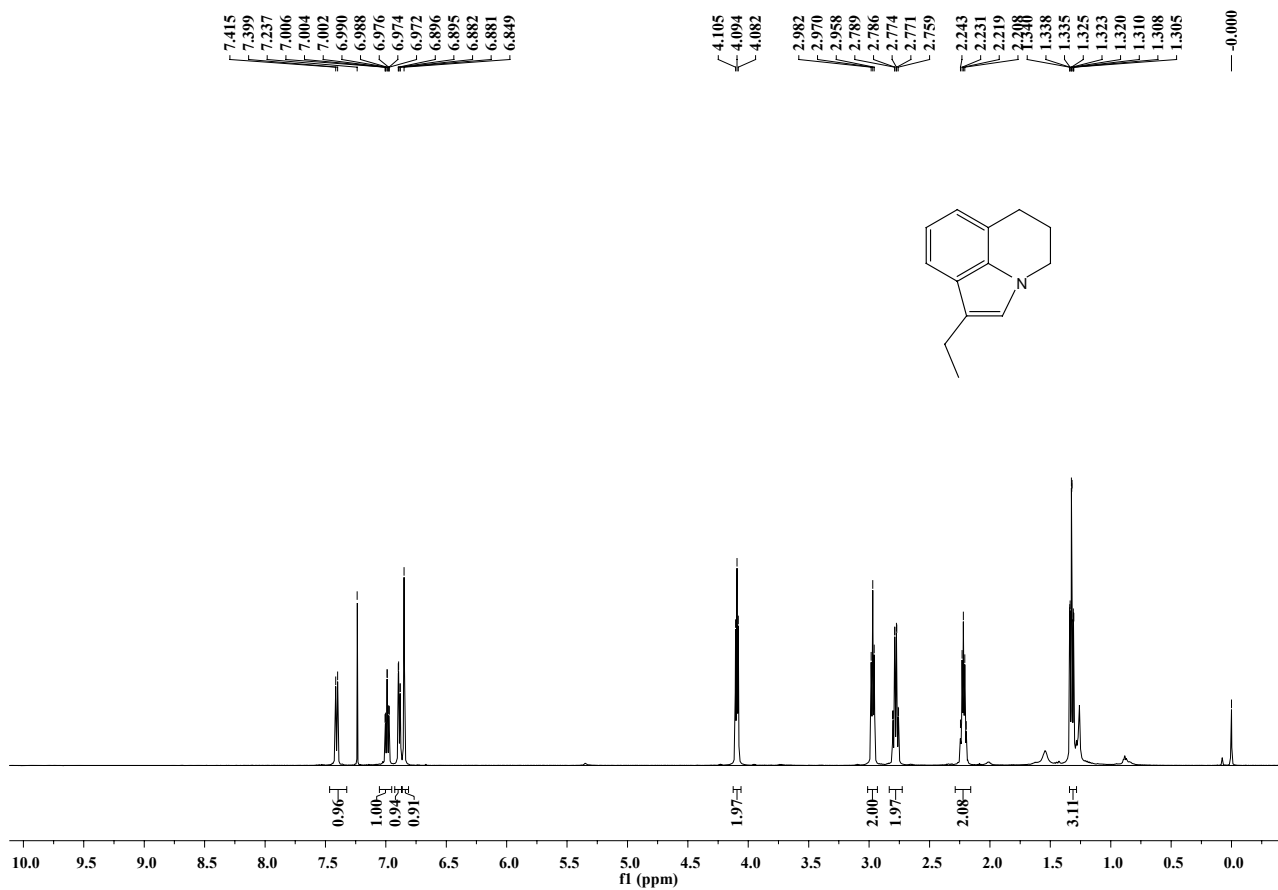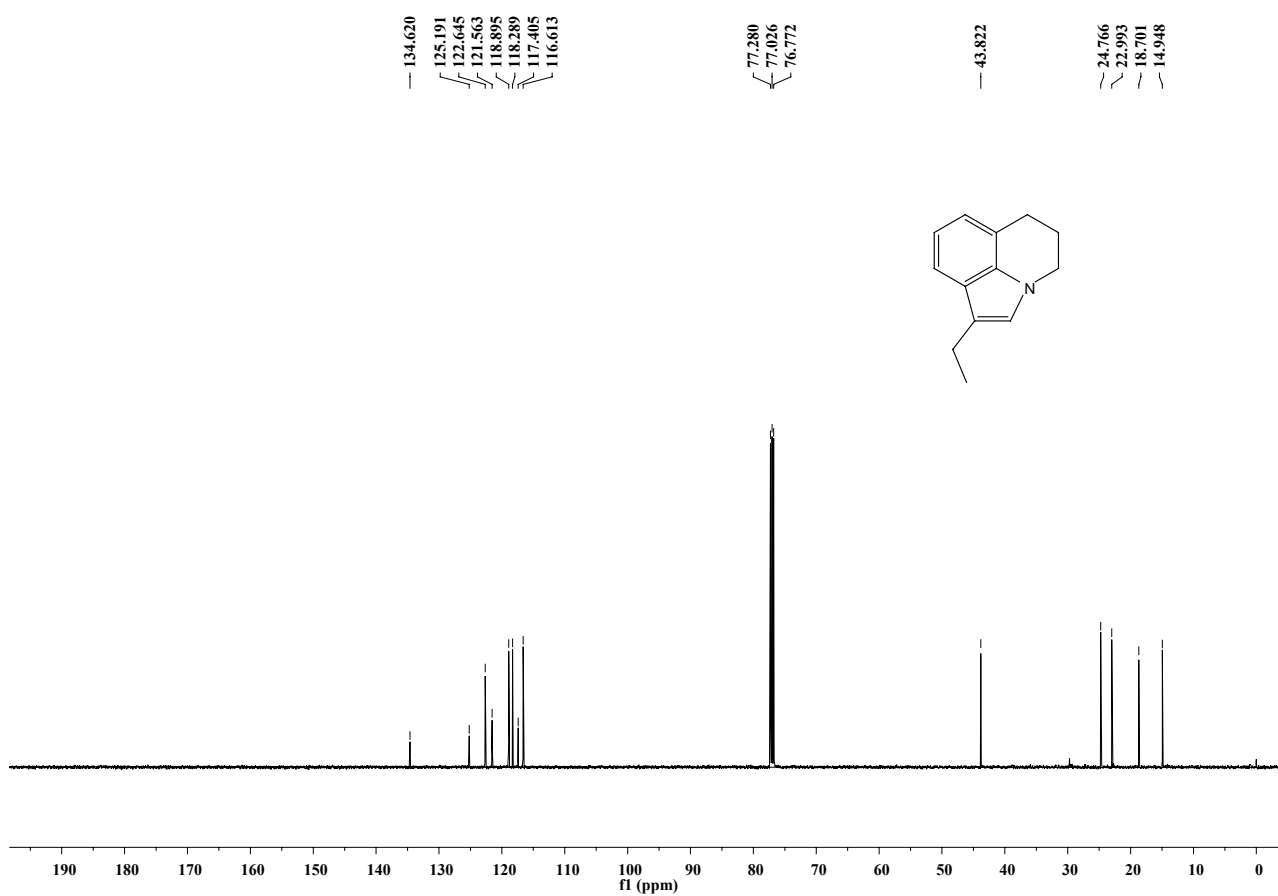

# Ethyl 2-(5,6-dihydro-4H-pyrrolo[3,2,1-ij]quinolin-1-yl)acetate (2n)

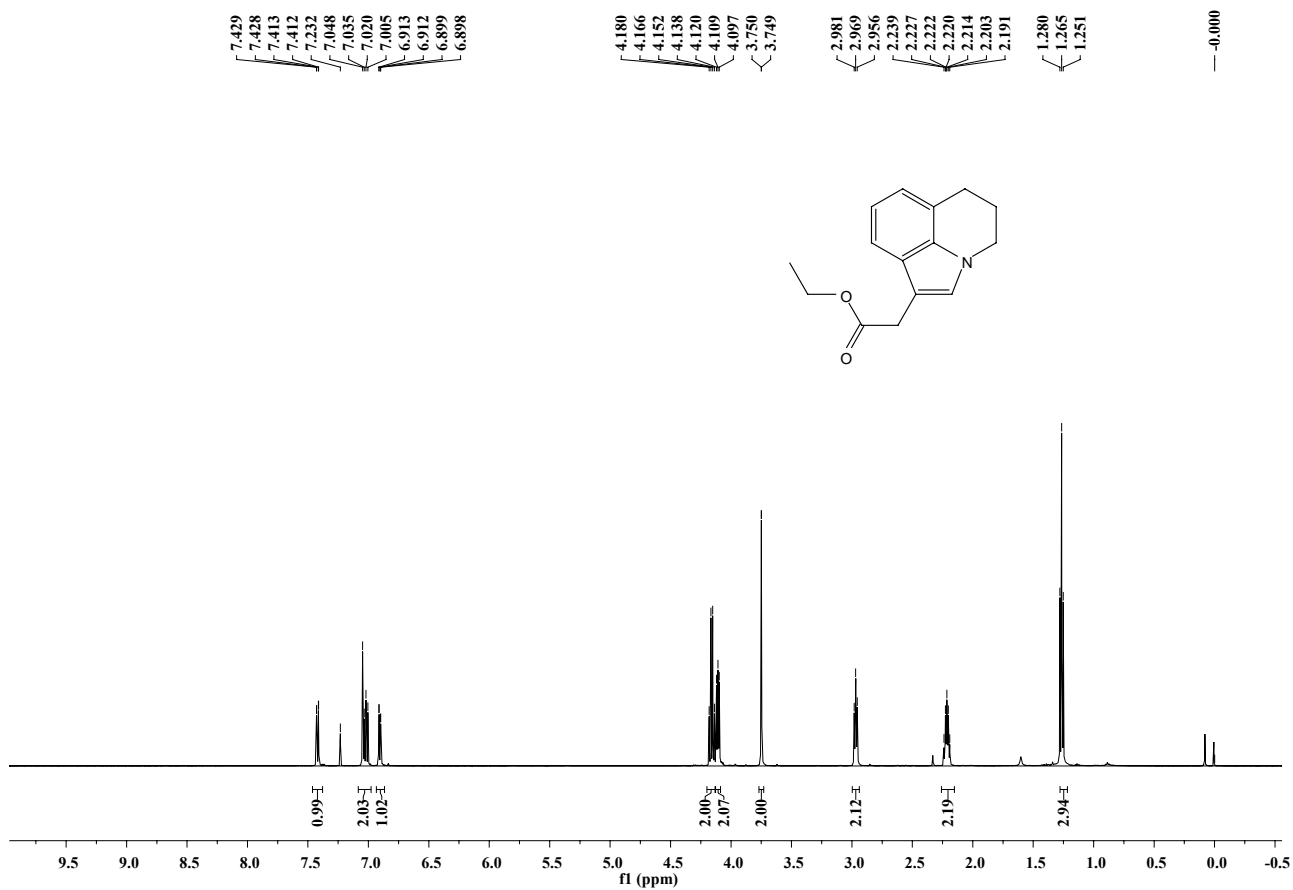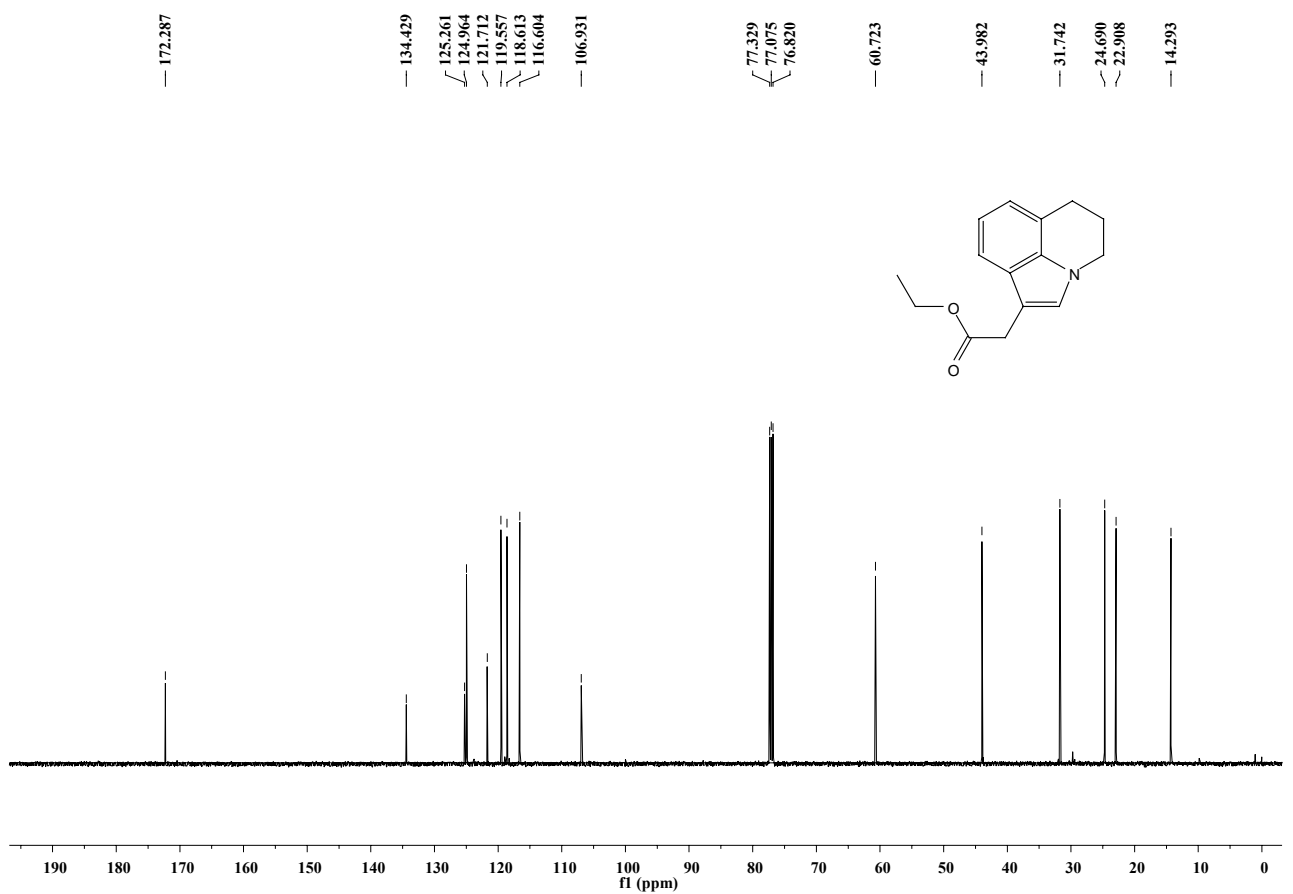

### 4-methyl-1-phenyl-5,6-dihydro-4H-pyrrolo[3,2,1-ij]quinoline (2o)

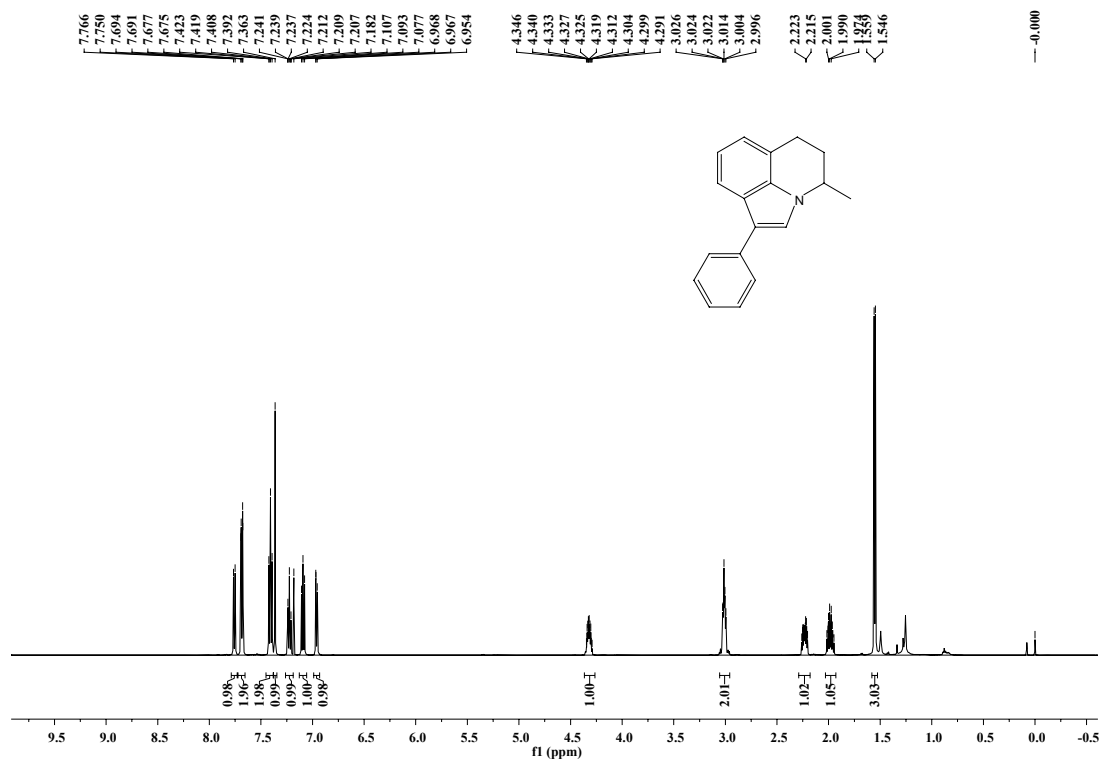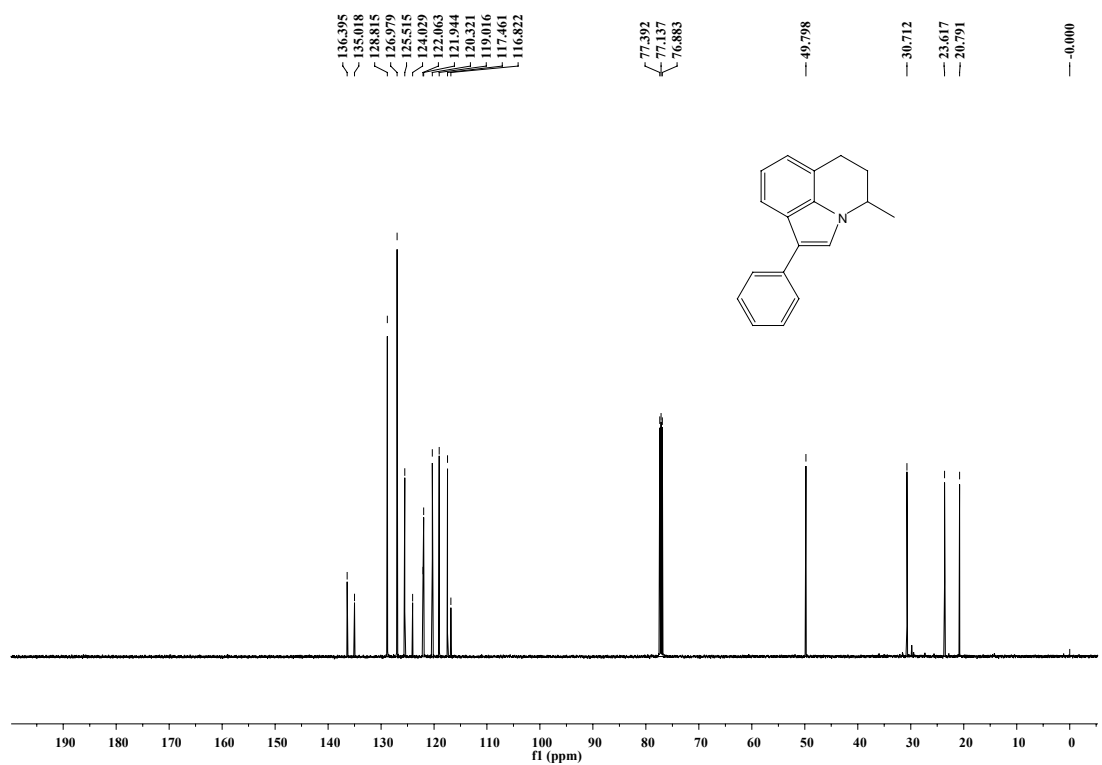

# 8-methyl-1-phenyl-5,6-dihydro-4H-pyrrolo[3,2,1-ij]quinoline (2p)

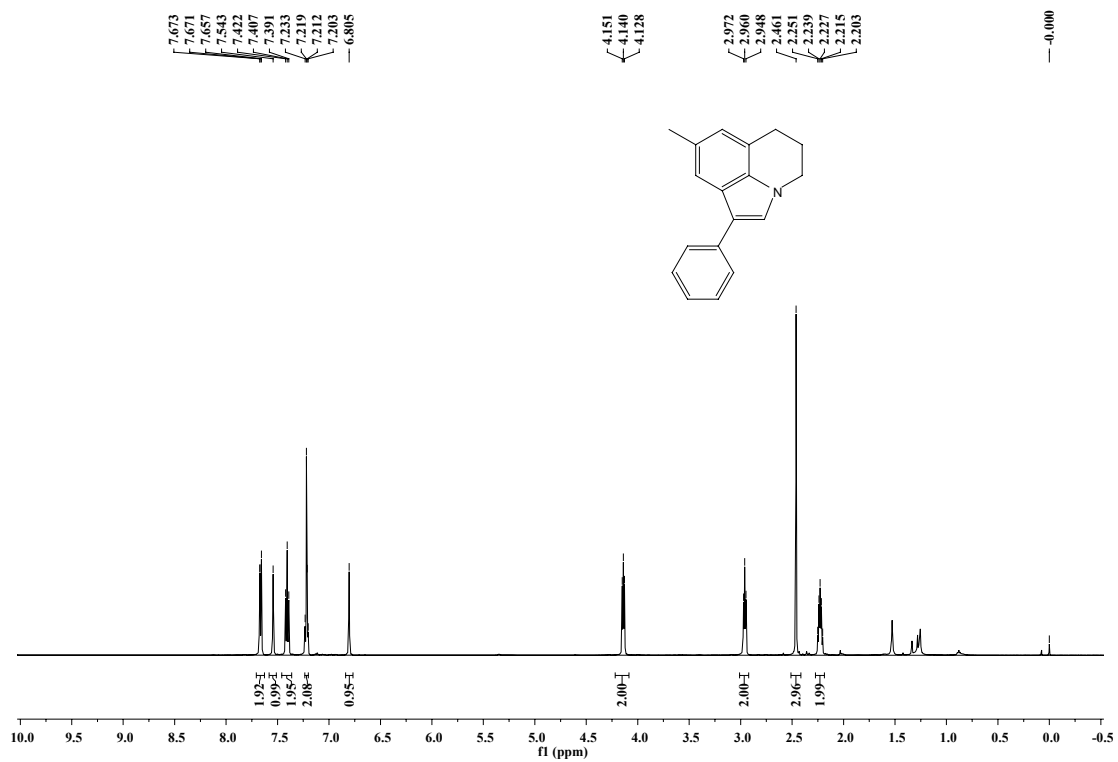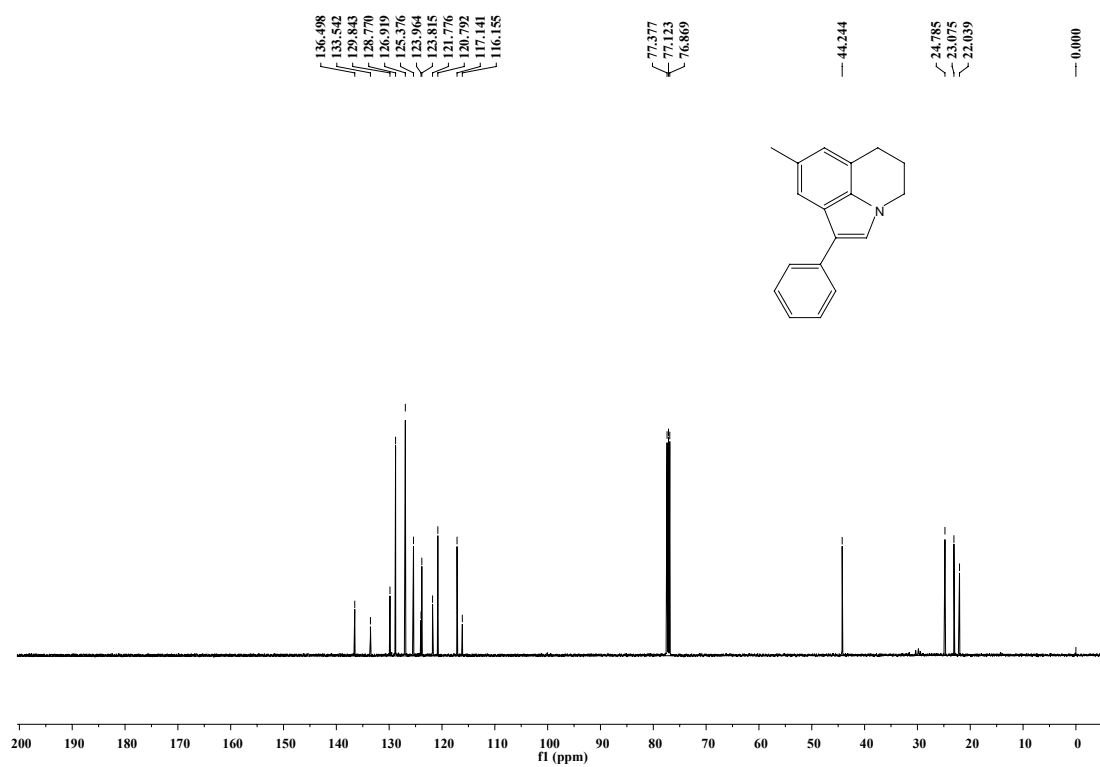

# 4,4,6,9-tetramethyl-1-phenyl-5,6-dihydro-4H-pyrrolo[3,2,1-ij]quinoline (2q)

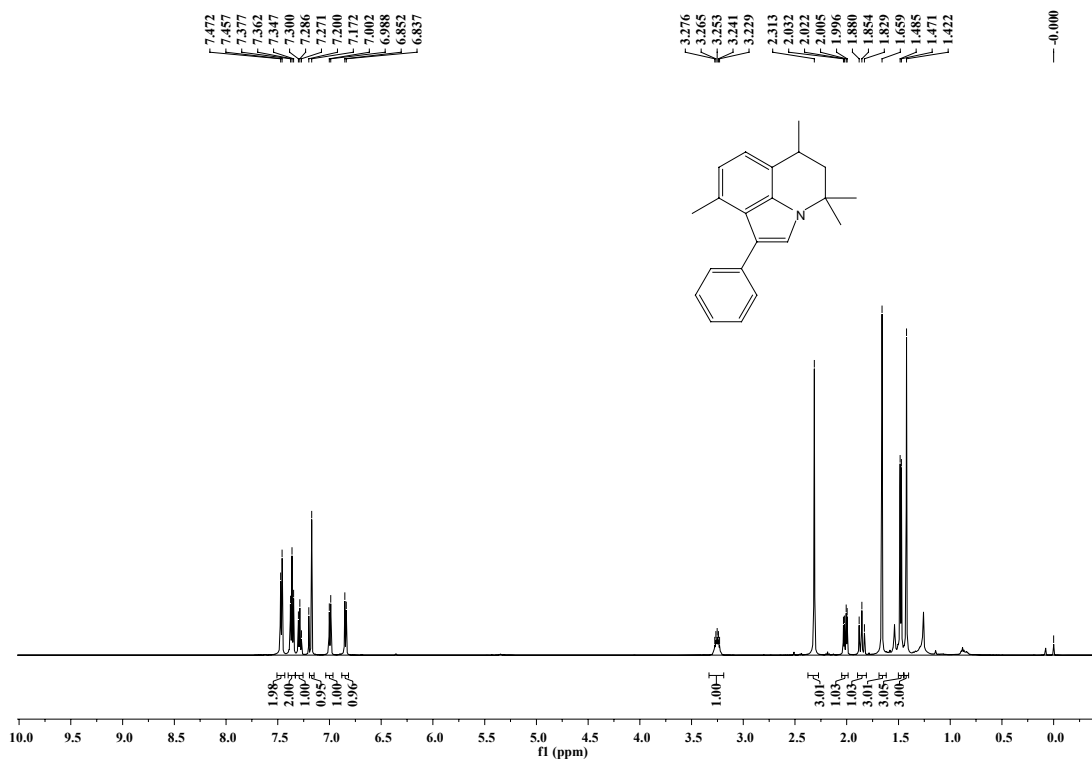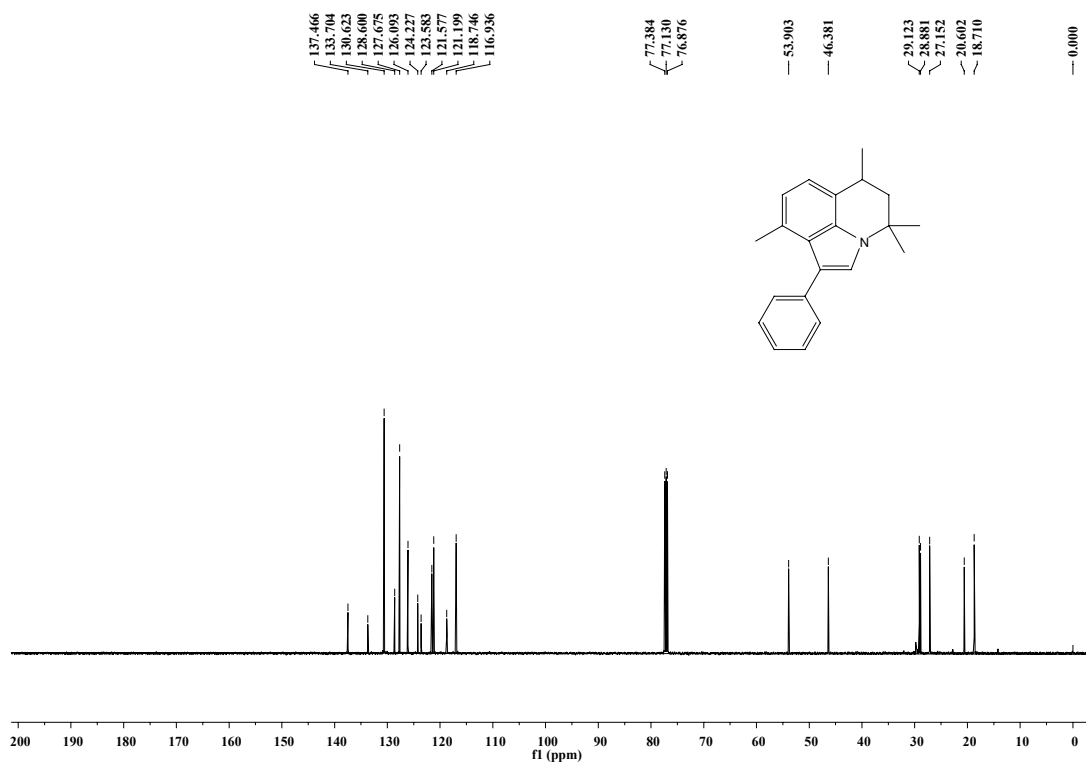



## 2-((4-bromophenyl)(methyl)amino)-1-phenylethanone (3m)

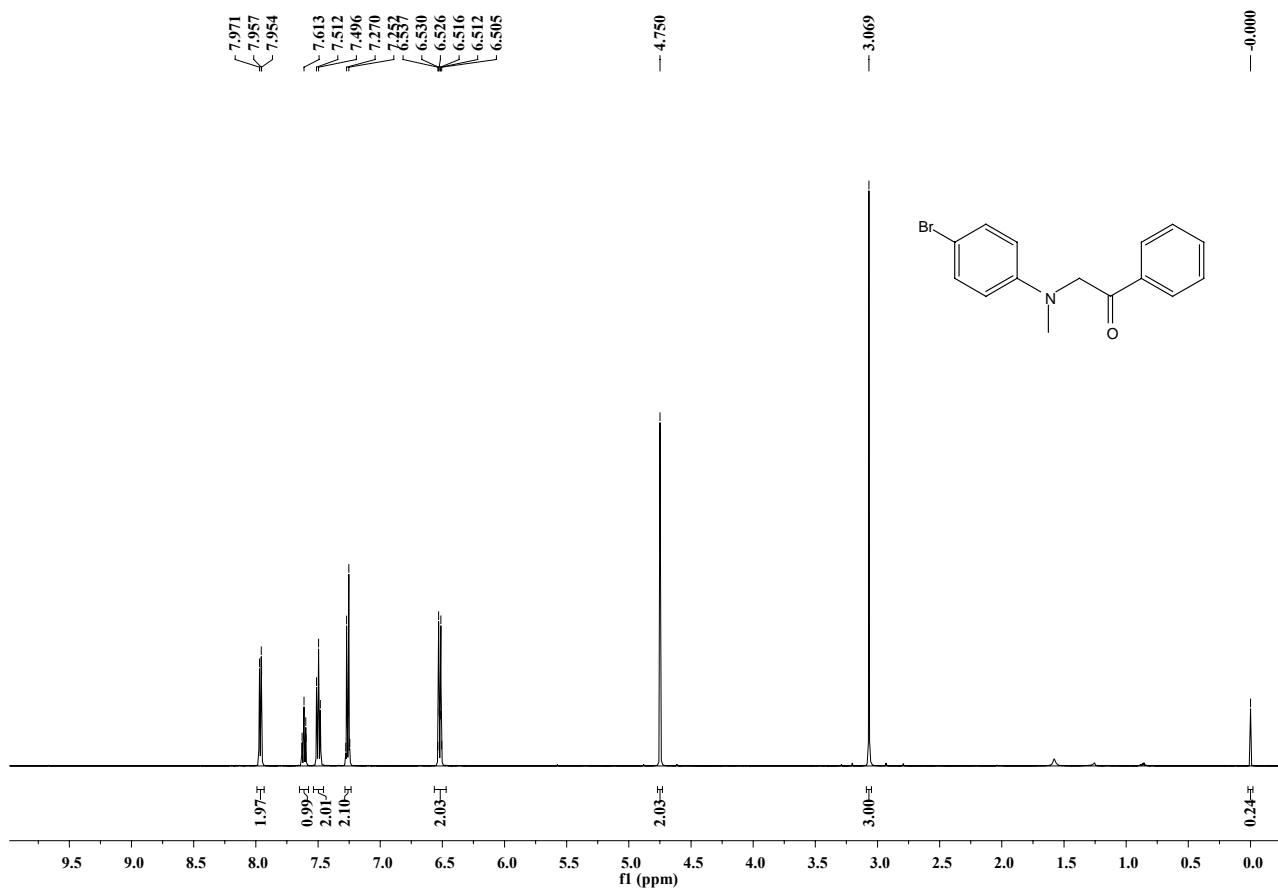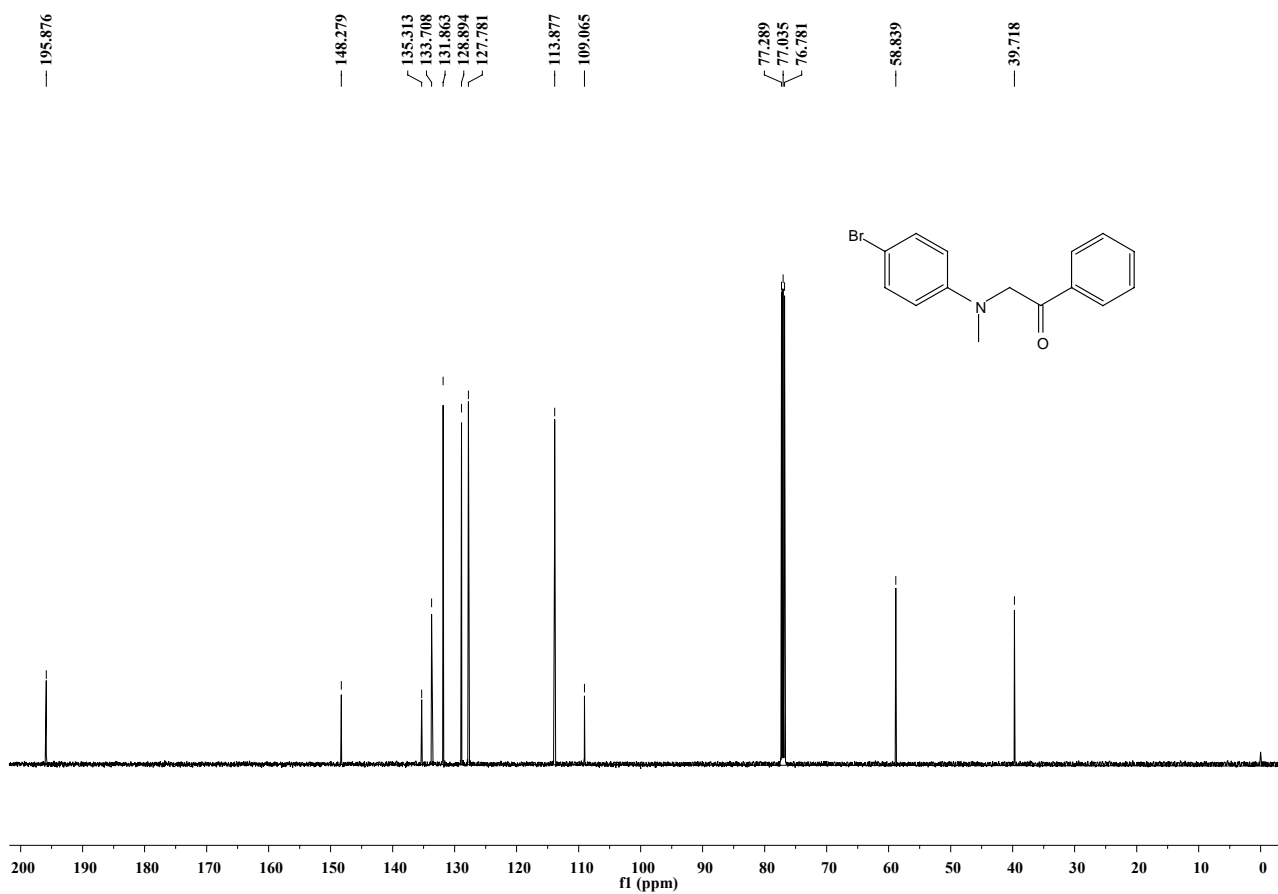

# 1-methyl-3-phenyl-1H-indole (4a)

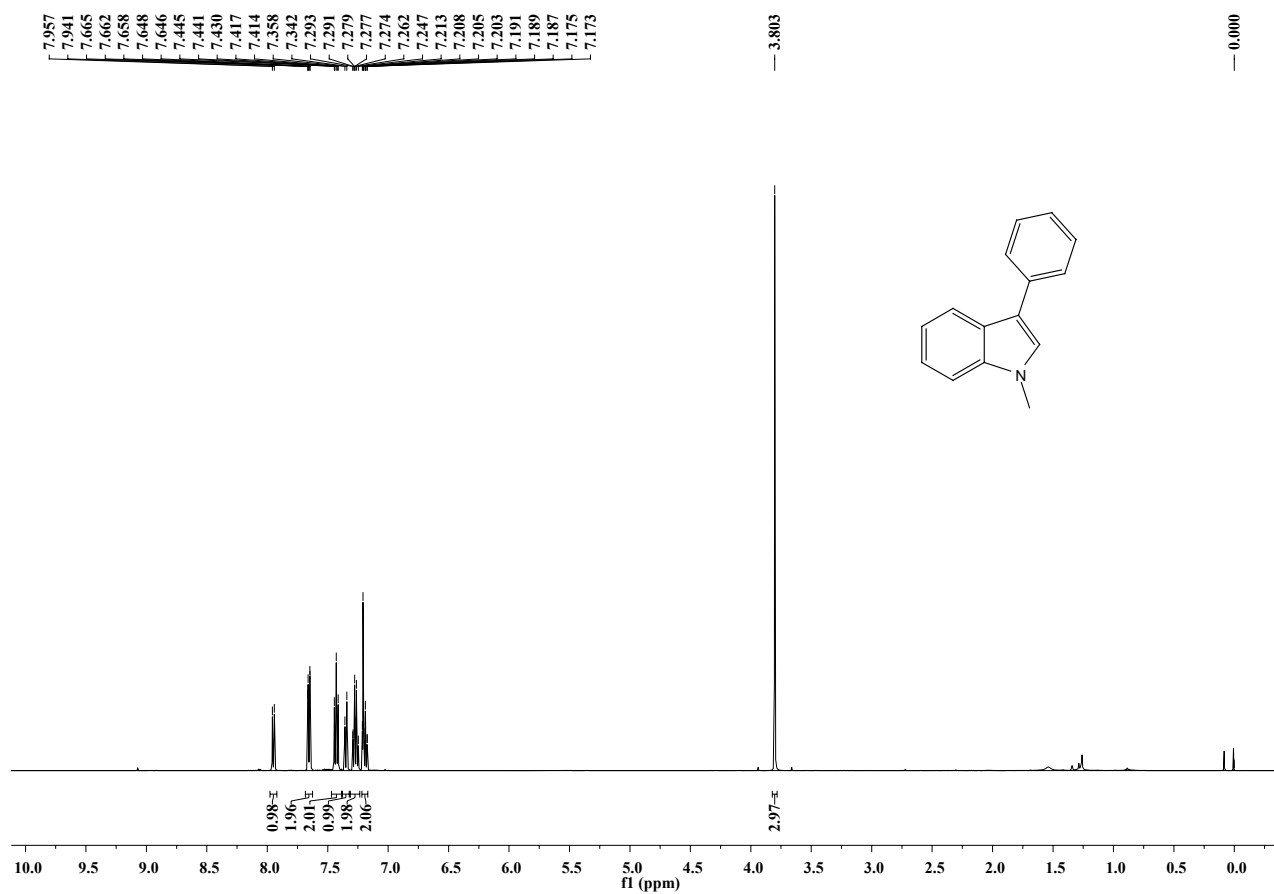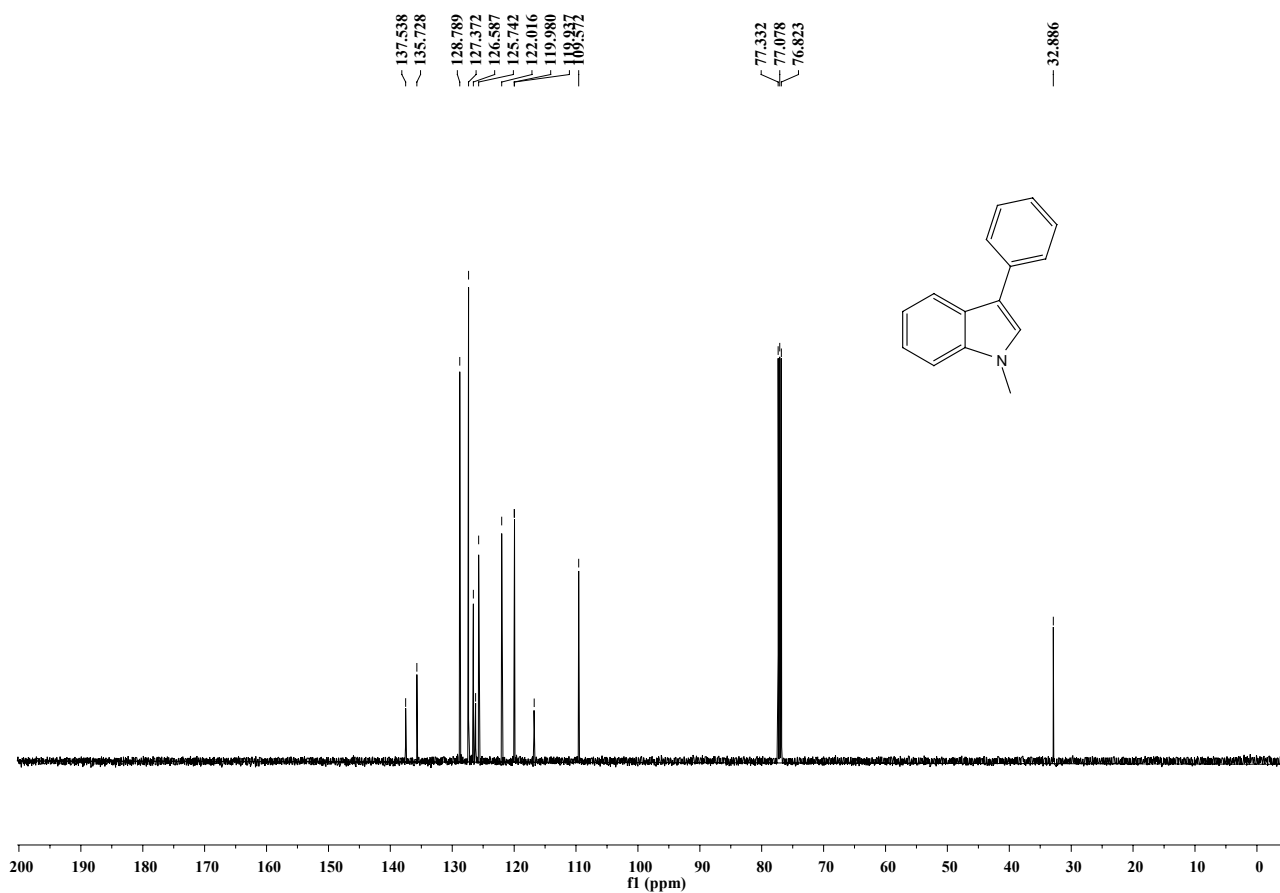

# 1-methyl-3-(p-tolyl)-1H-indole (4b)

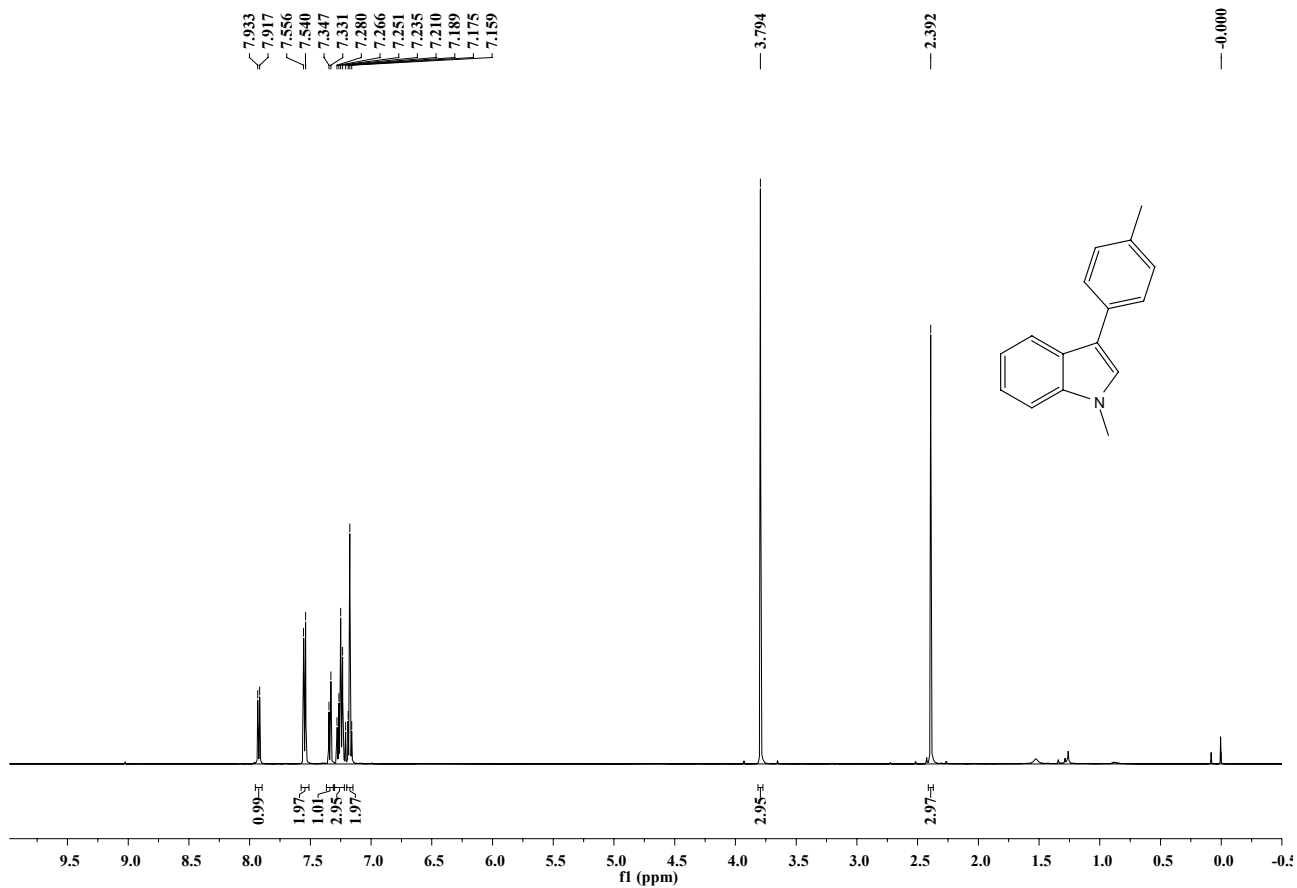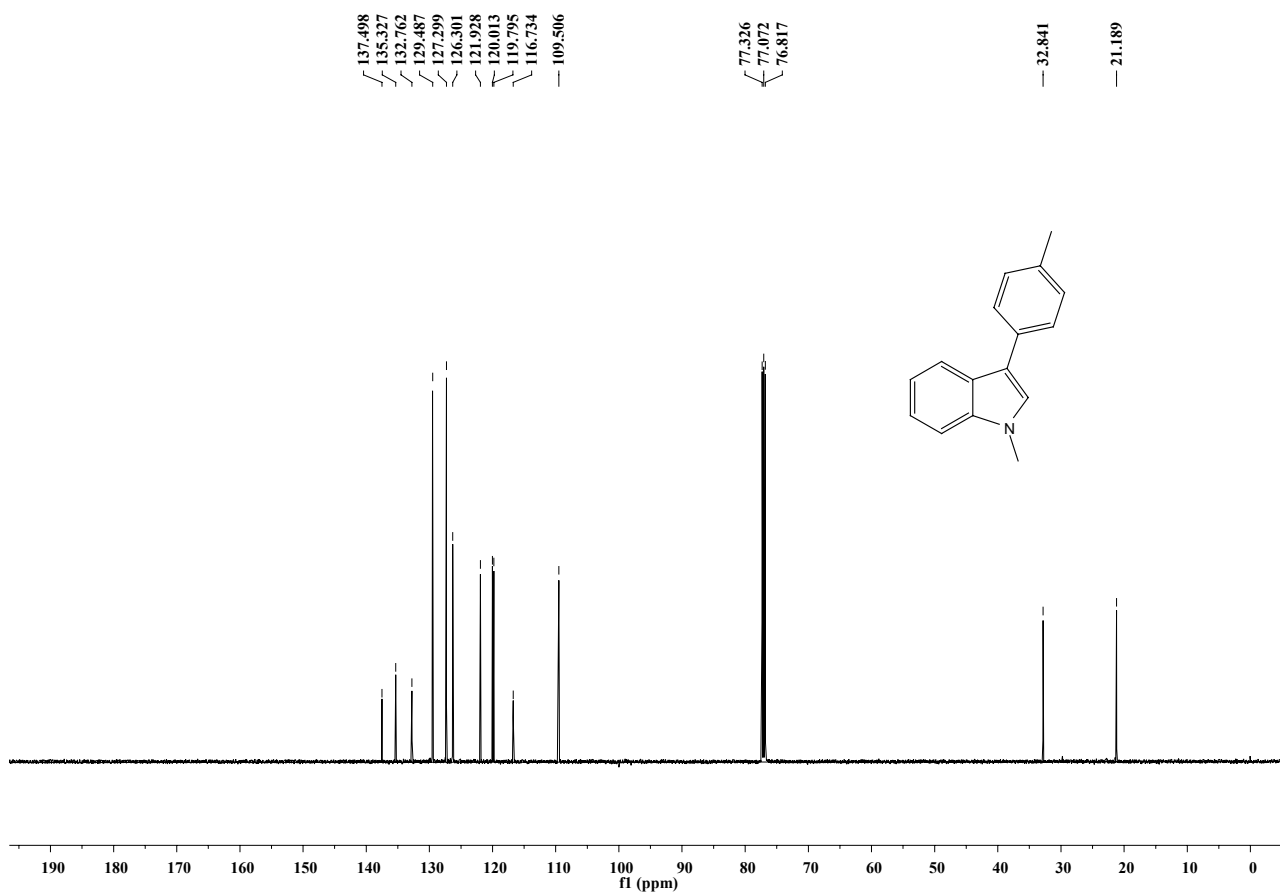

### 3-(4-methoxyphenyl)-1-methyl-1H-indole (4c)

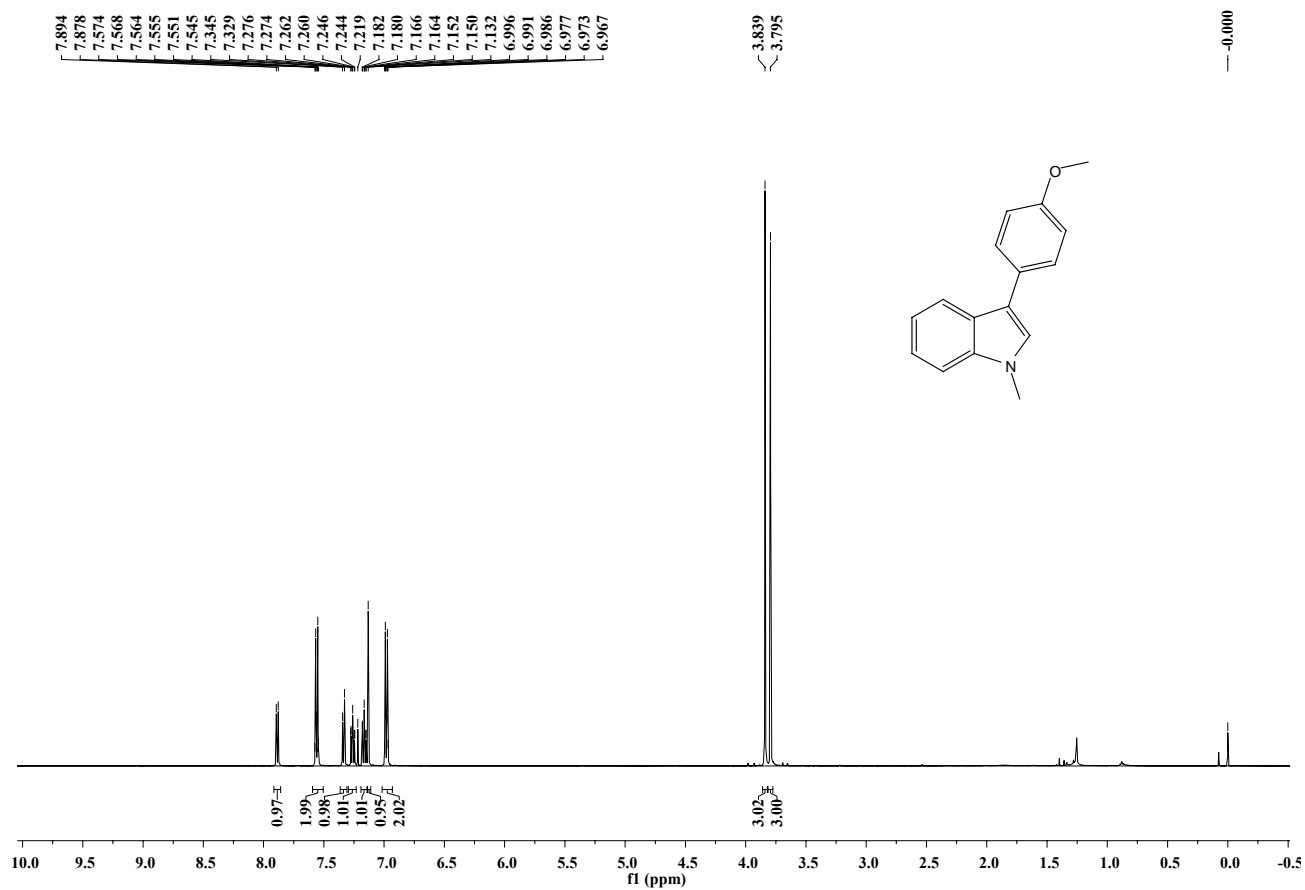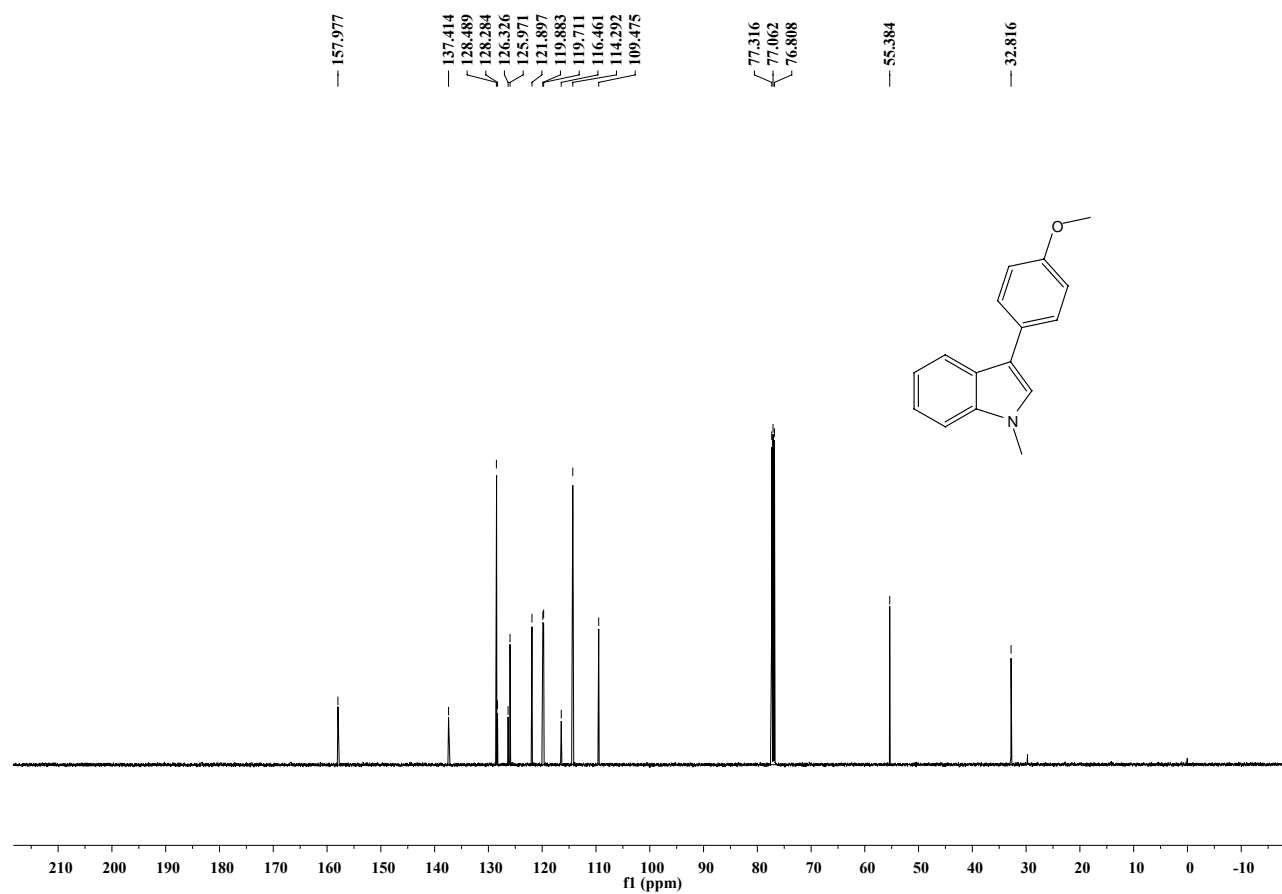

### 3-(4-chlorophenyl)-1-methyl-1H-indole (4d)

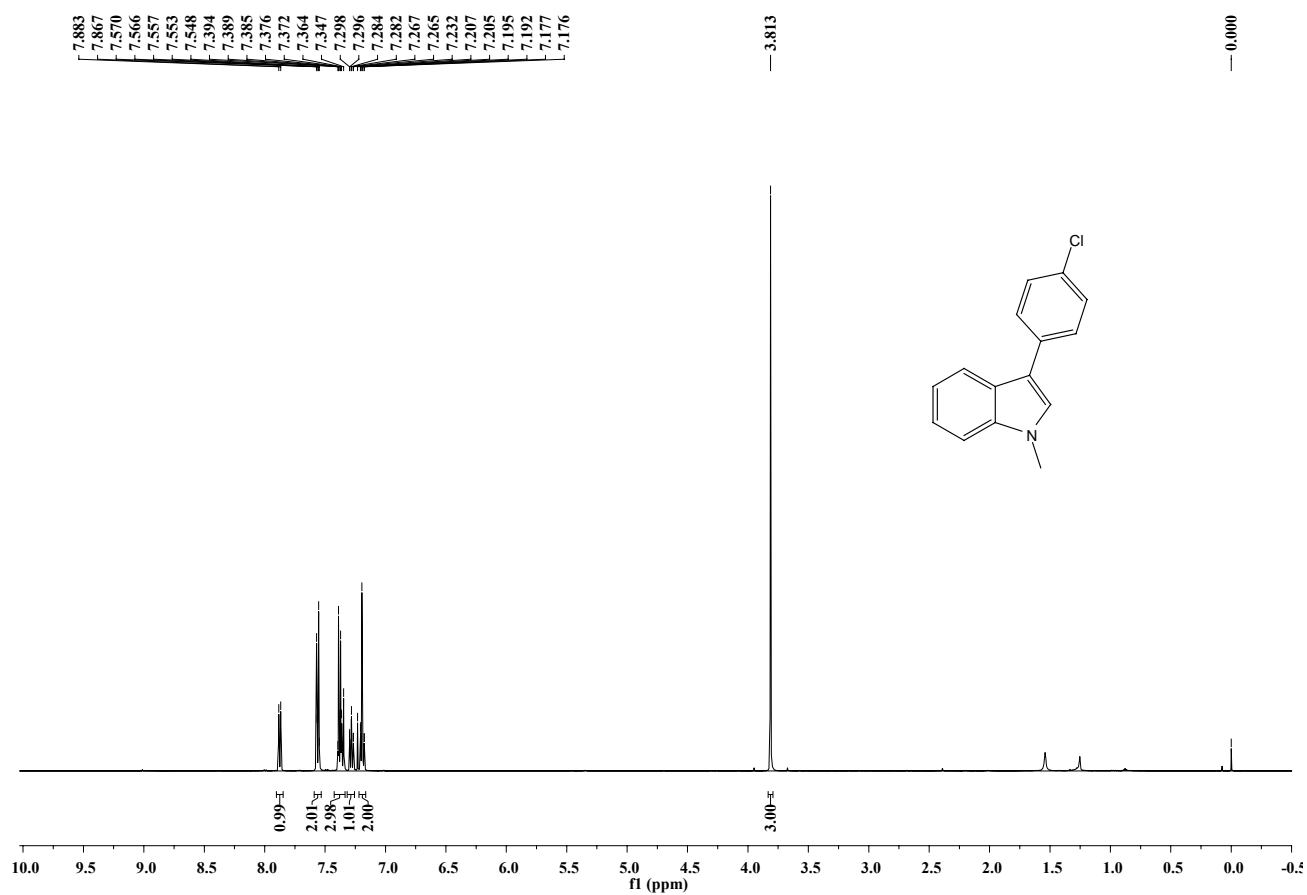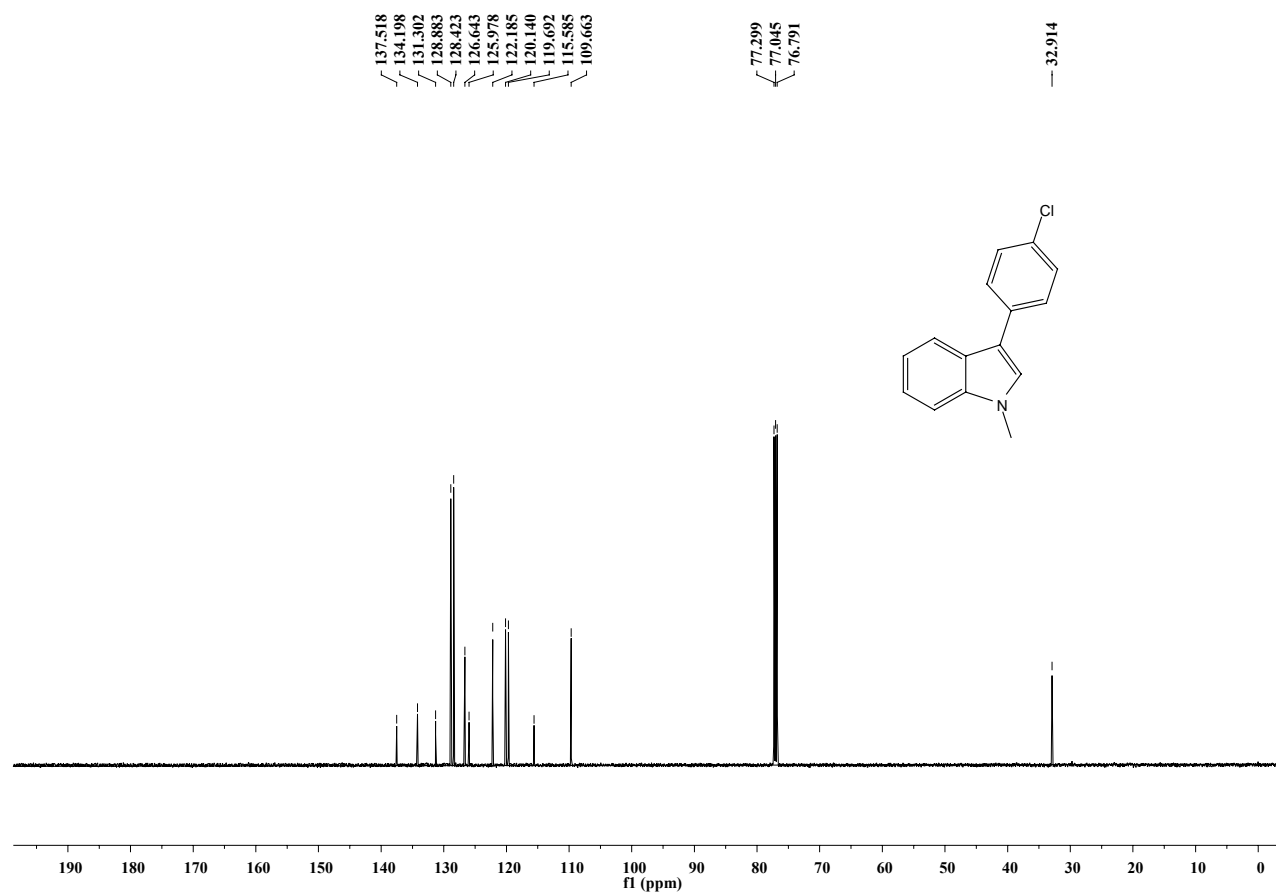

### 3-(4-bromophenyl)-1-methyl-1H-indole (4e)

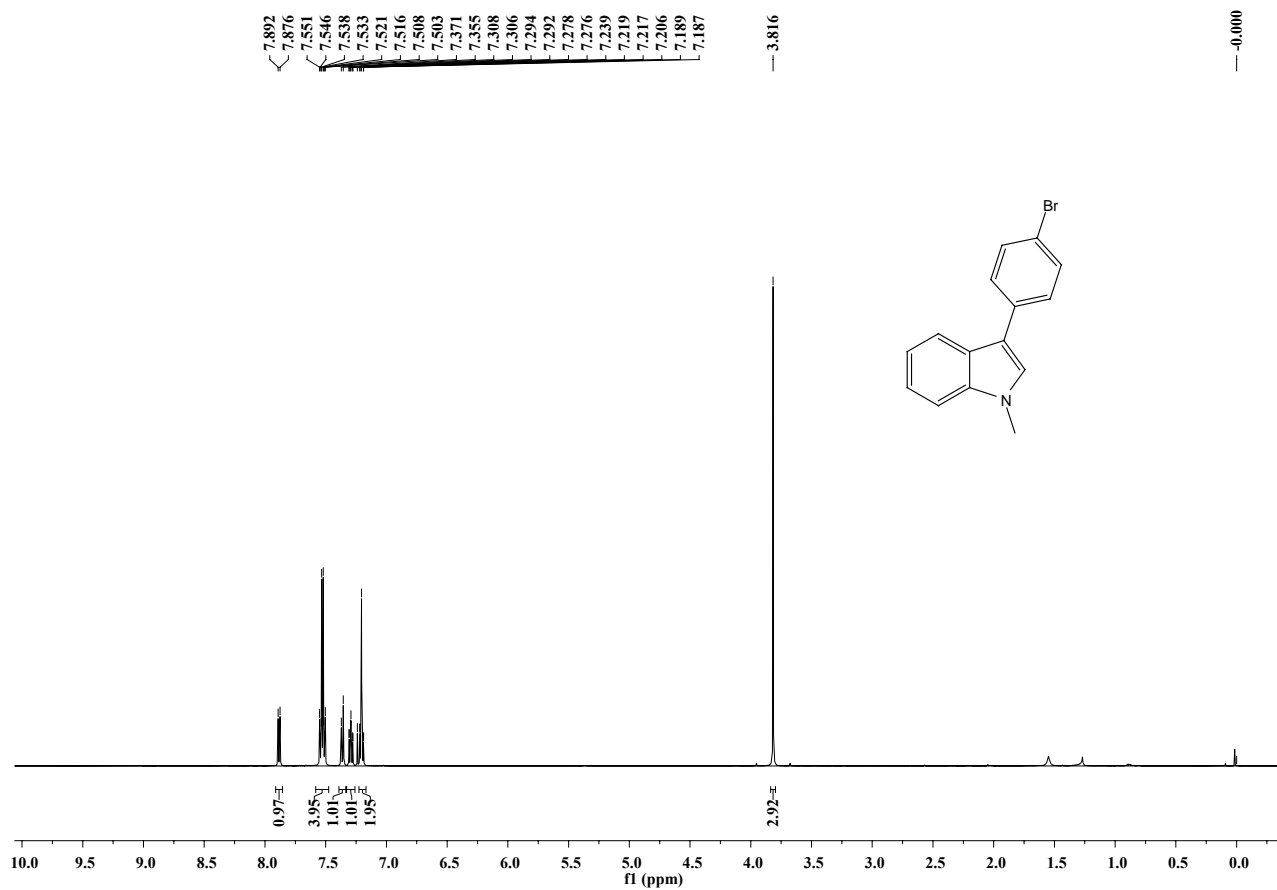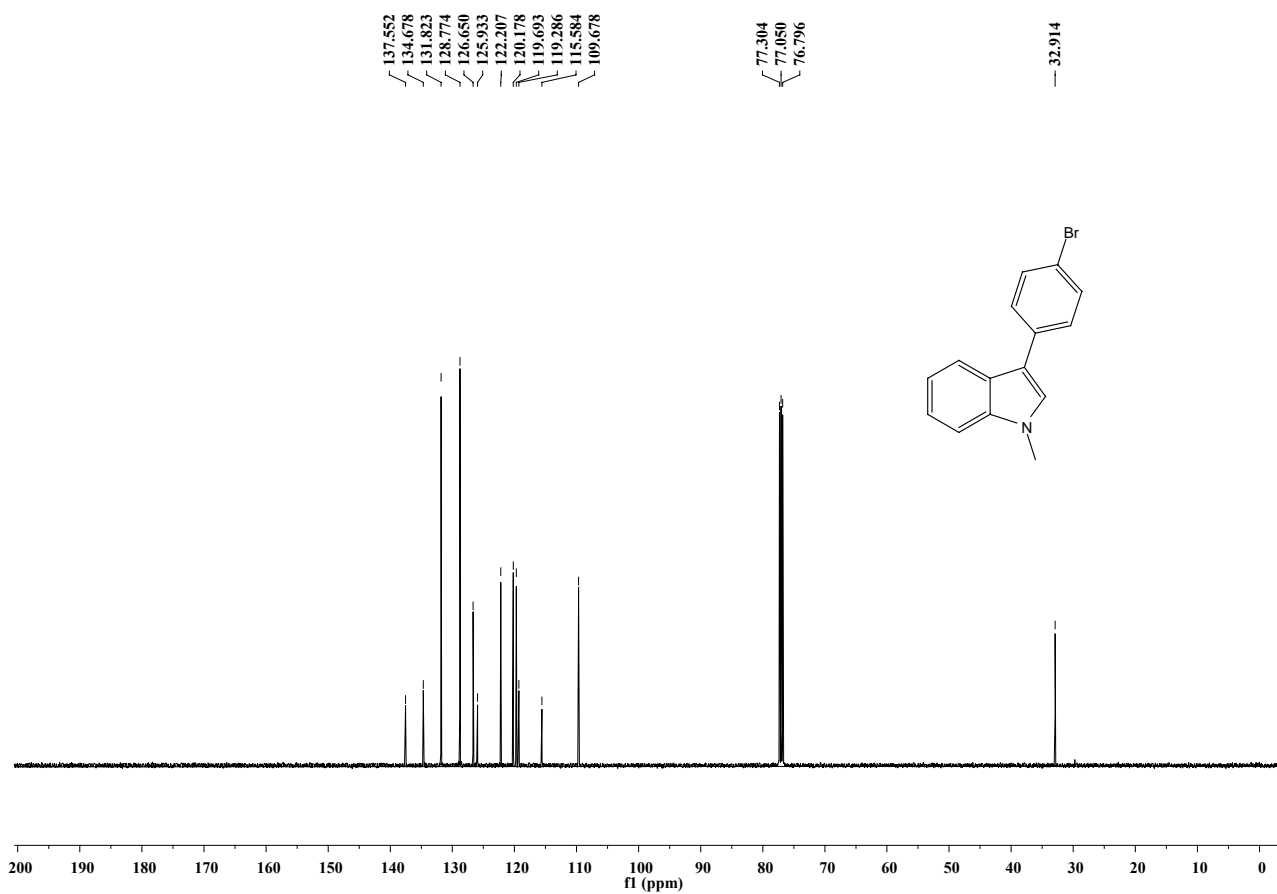

# 1-methyl-3-(4-(trifluoromethyl)phenyl)-1H-indole (4f)

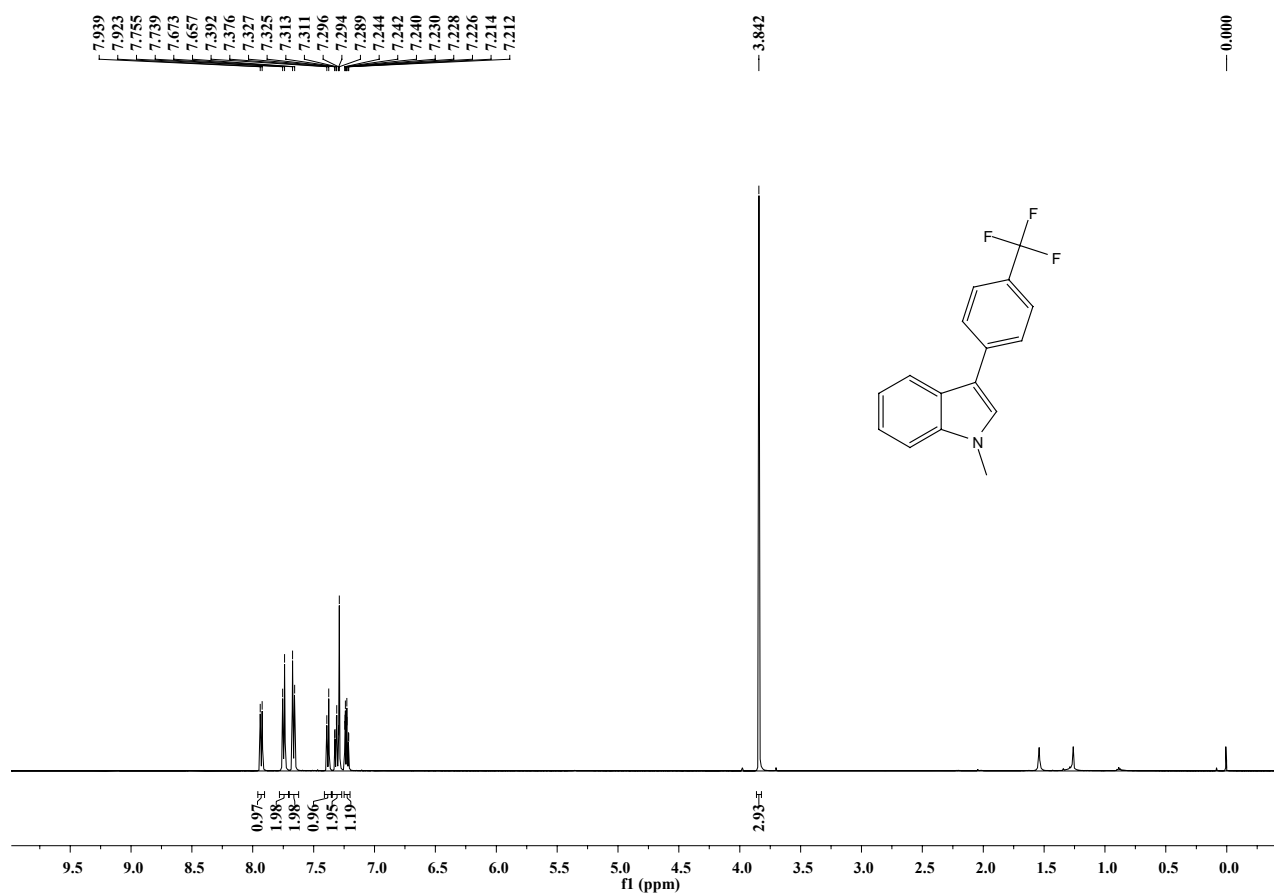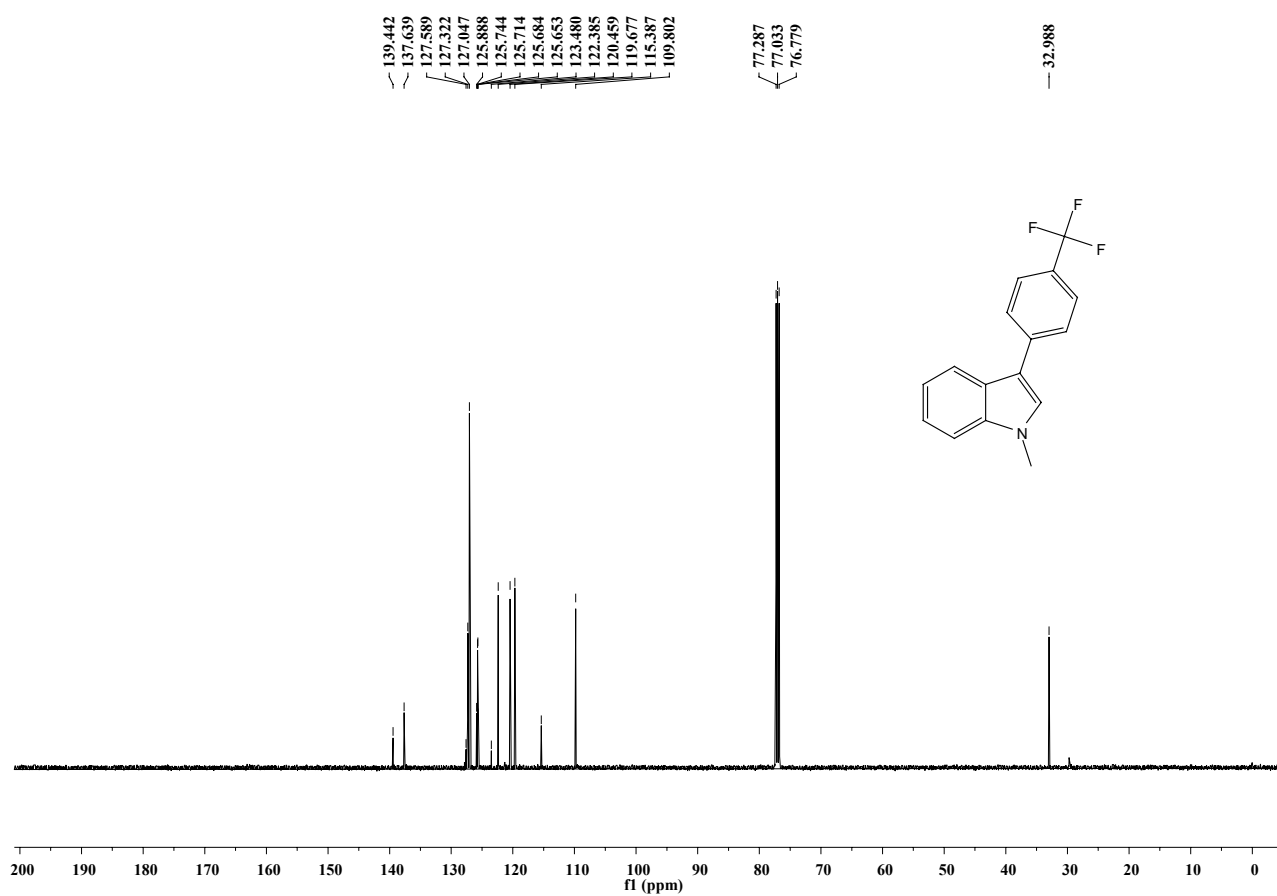

### 3-(3,4-difluorophenyl)-1-methyl-1H-indole (4g)

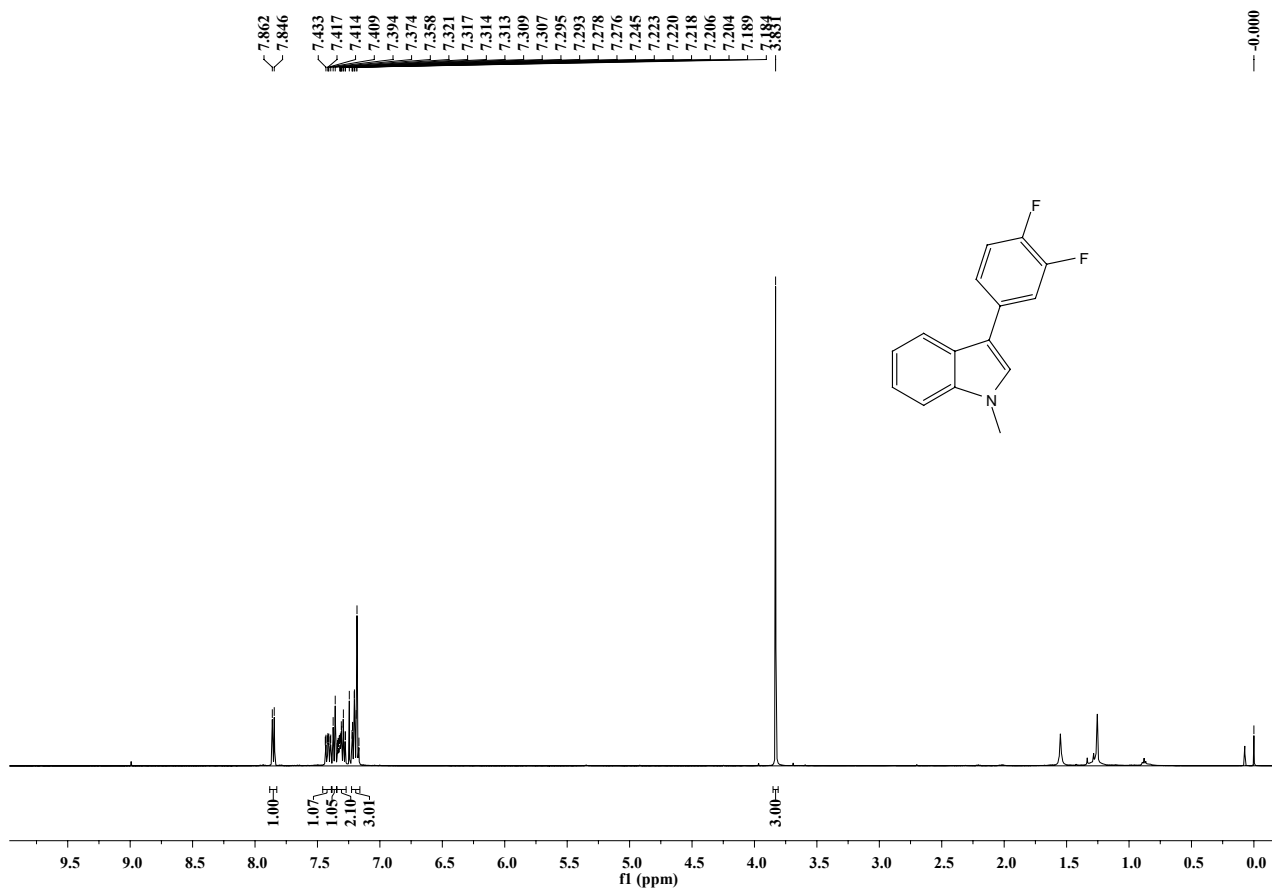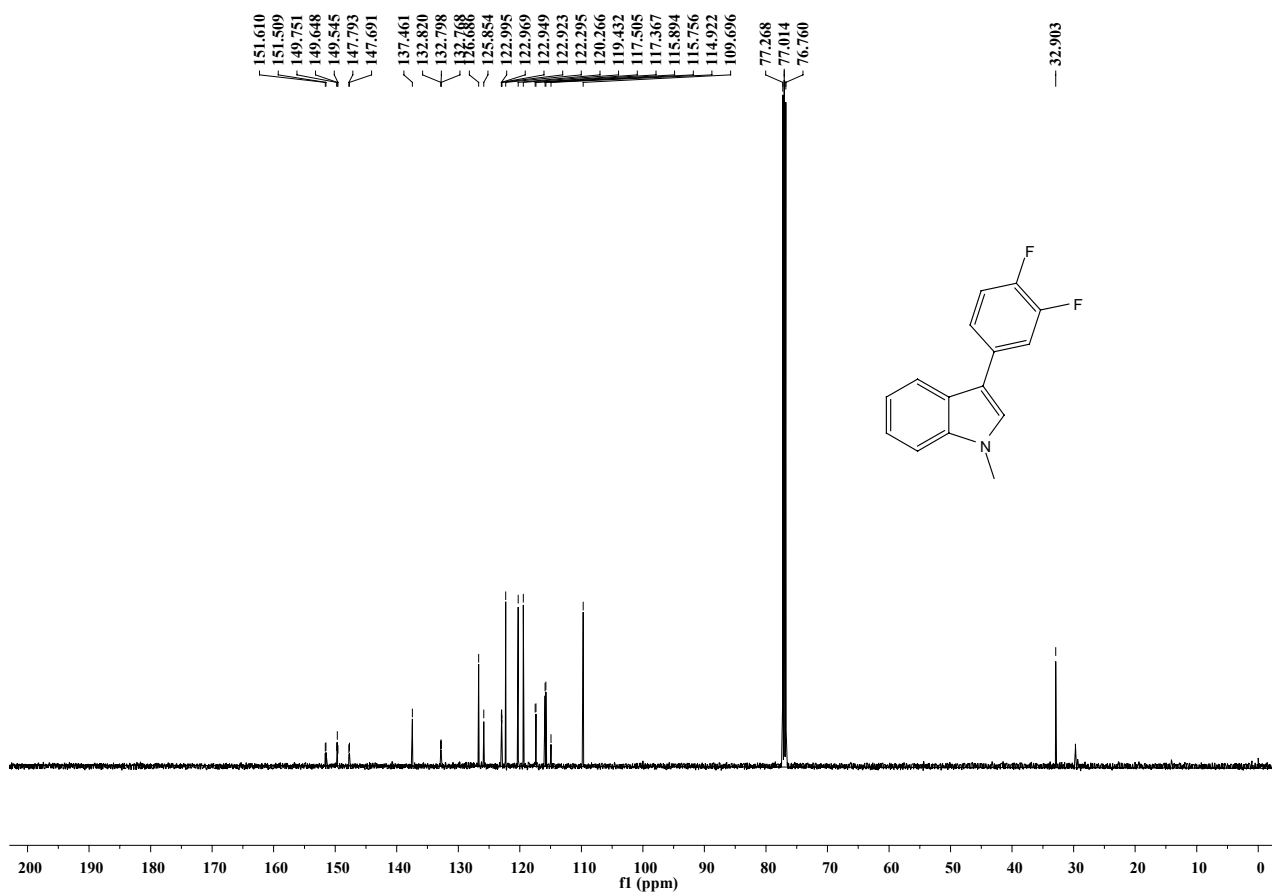



### 3-(3a,7a-dihydrobenzofuran-2-yl)-1-methyl-1H-indole (4h)

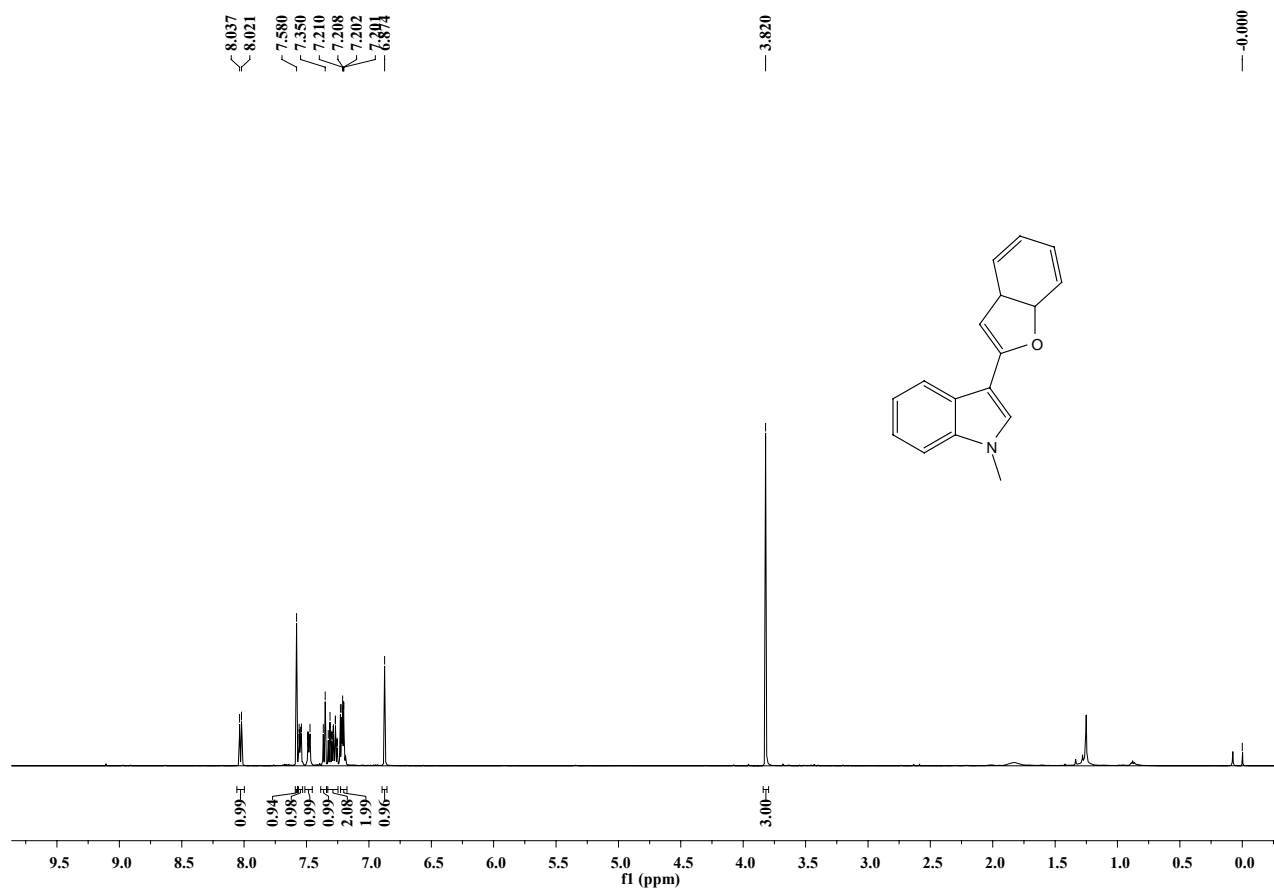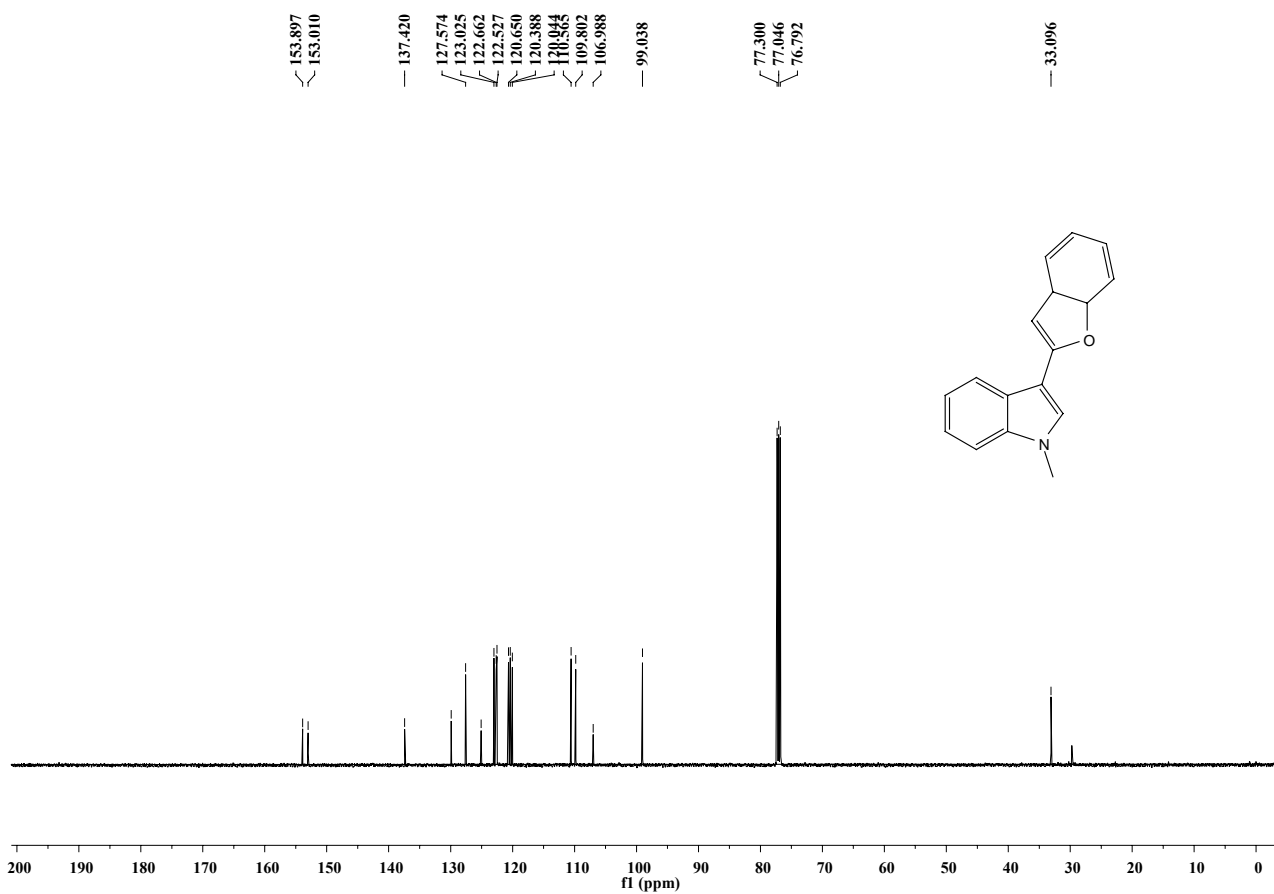

# Ethyl 2-(1-methyl-1H-indol-3-yl)acetate (4i)

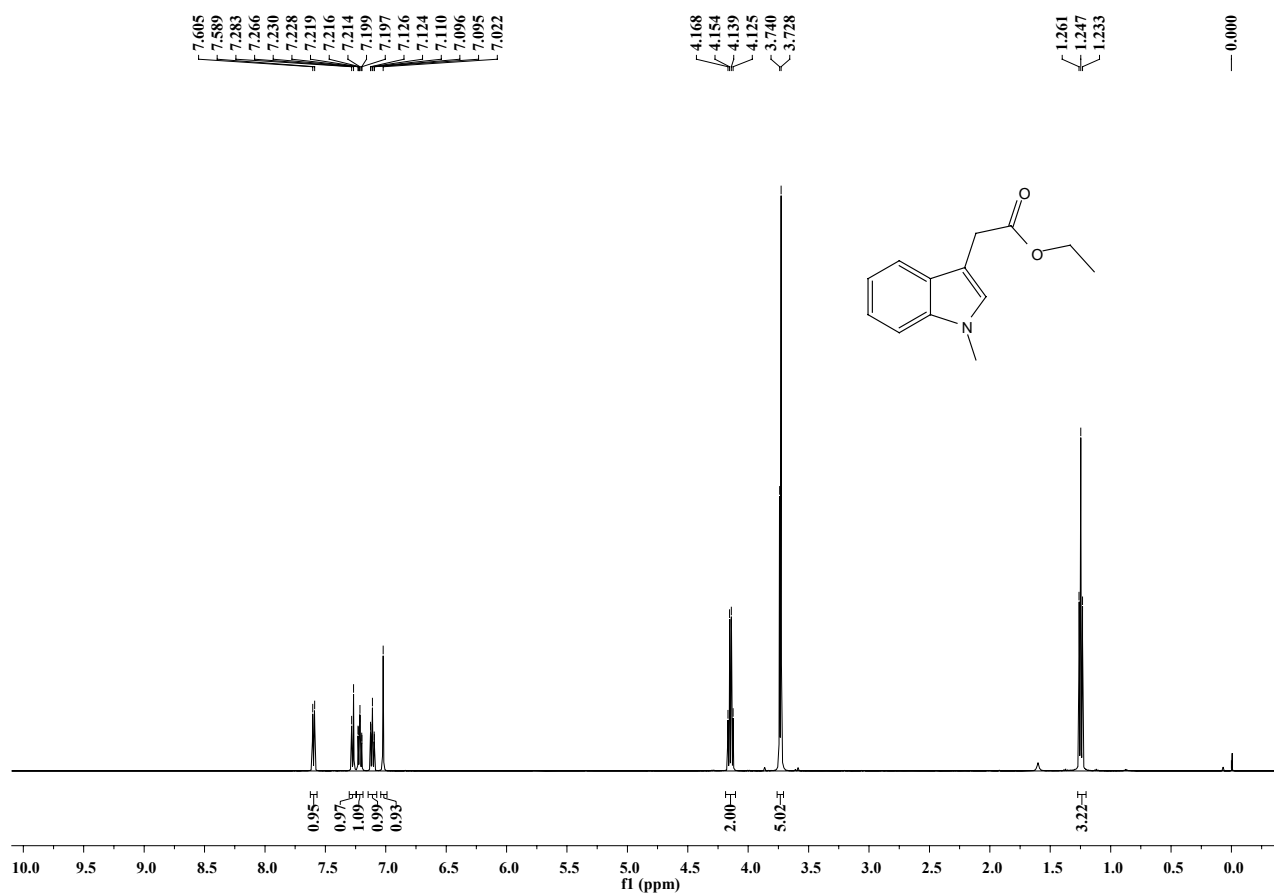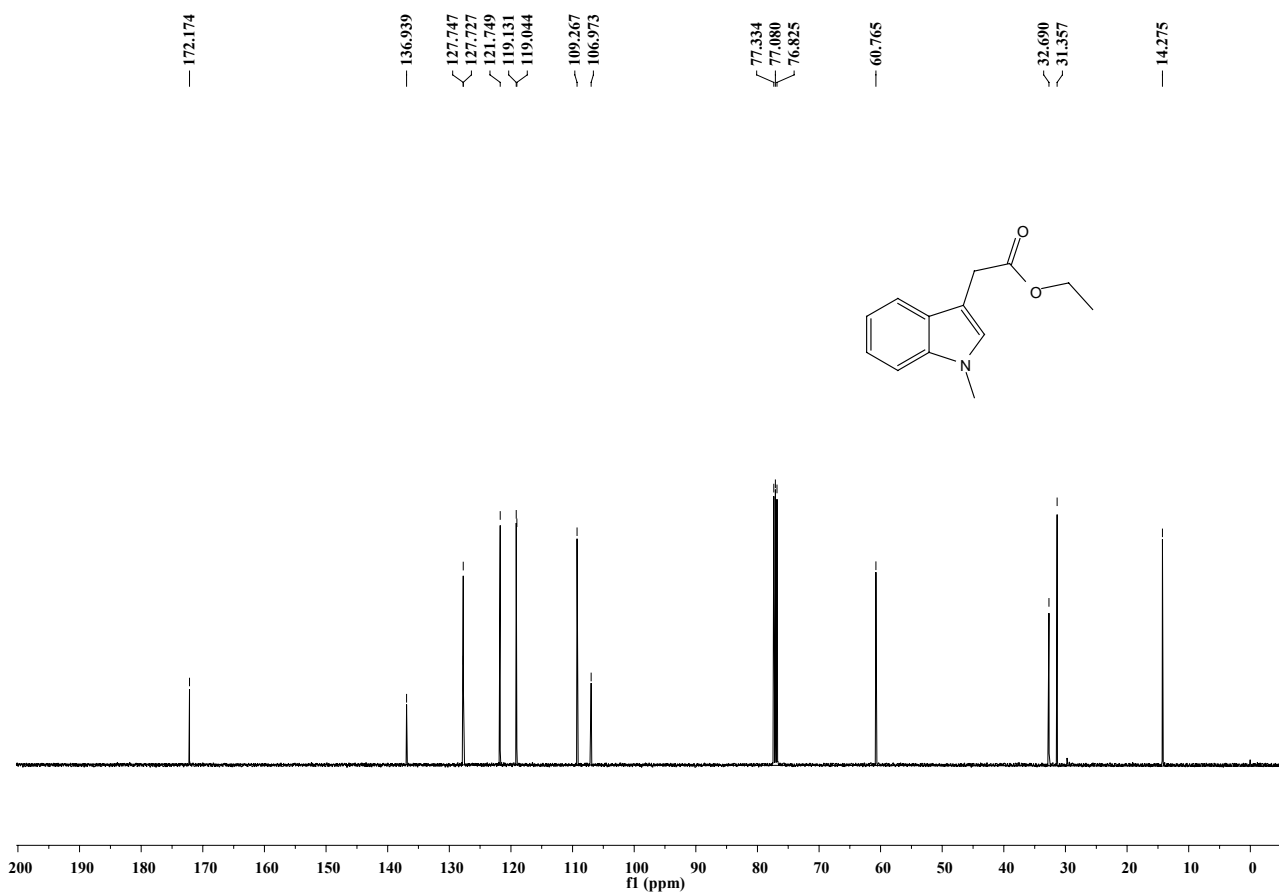

# 1,5-dimethyl-3-phenyl-1H-indole (4j)

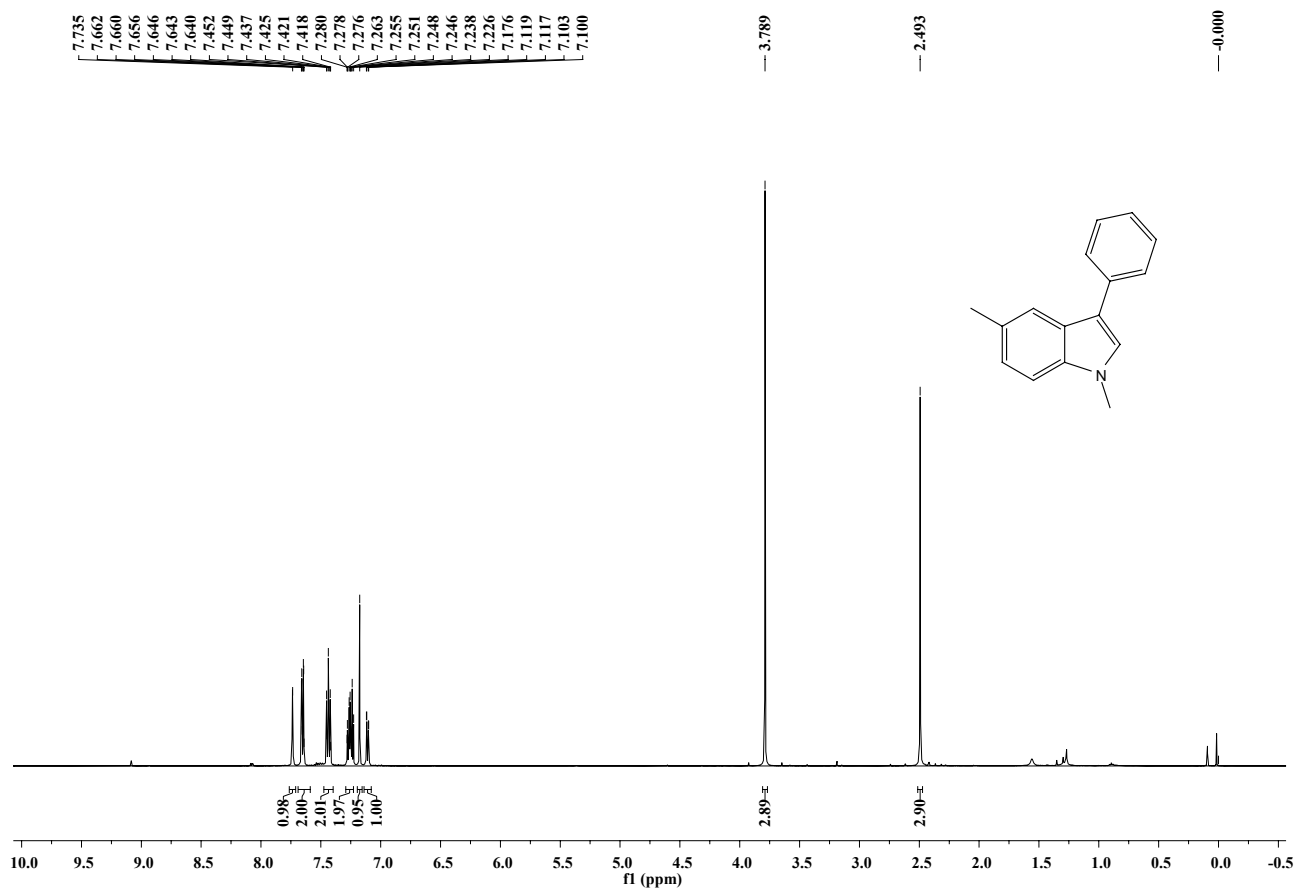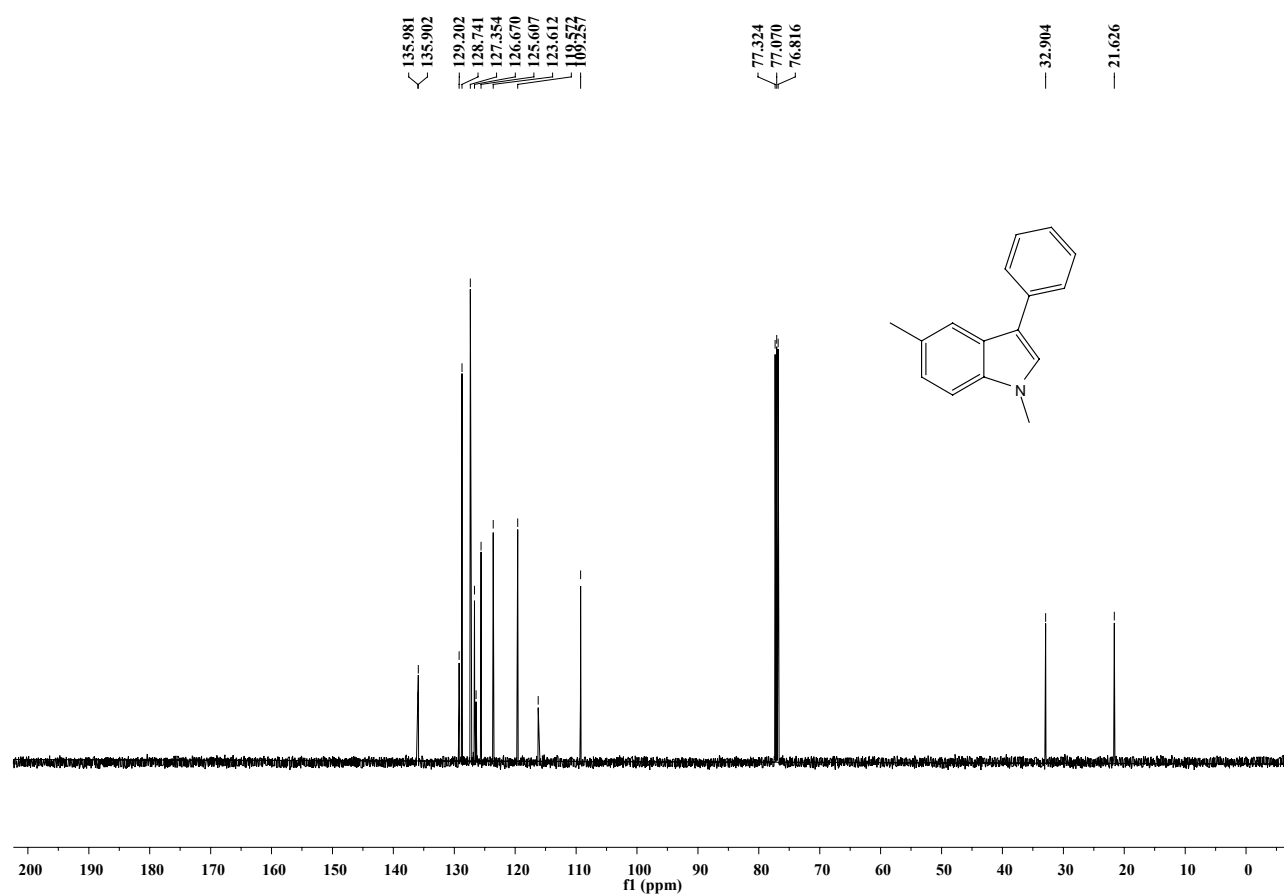

# 5-methoxy-1-methyl-3-phenyl-1H-indole (4k)

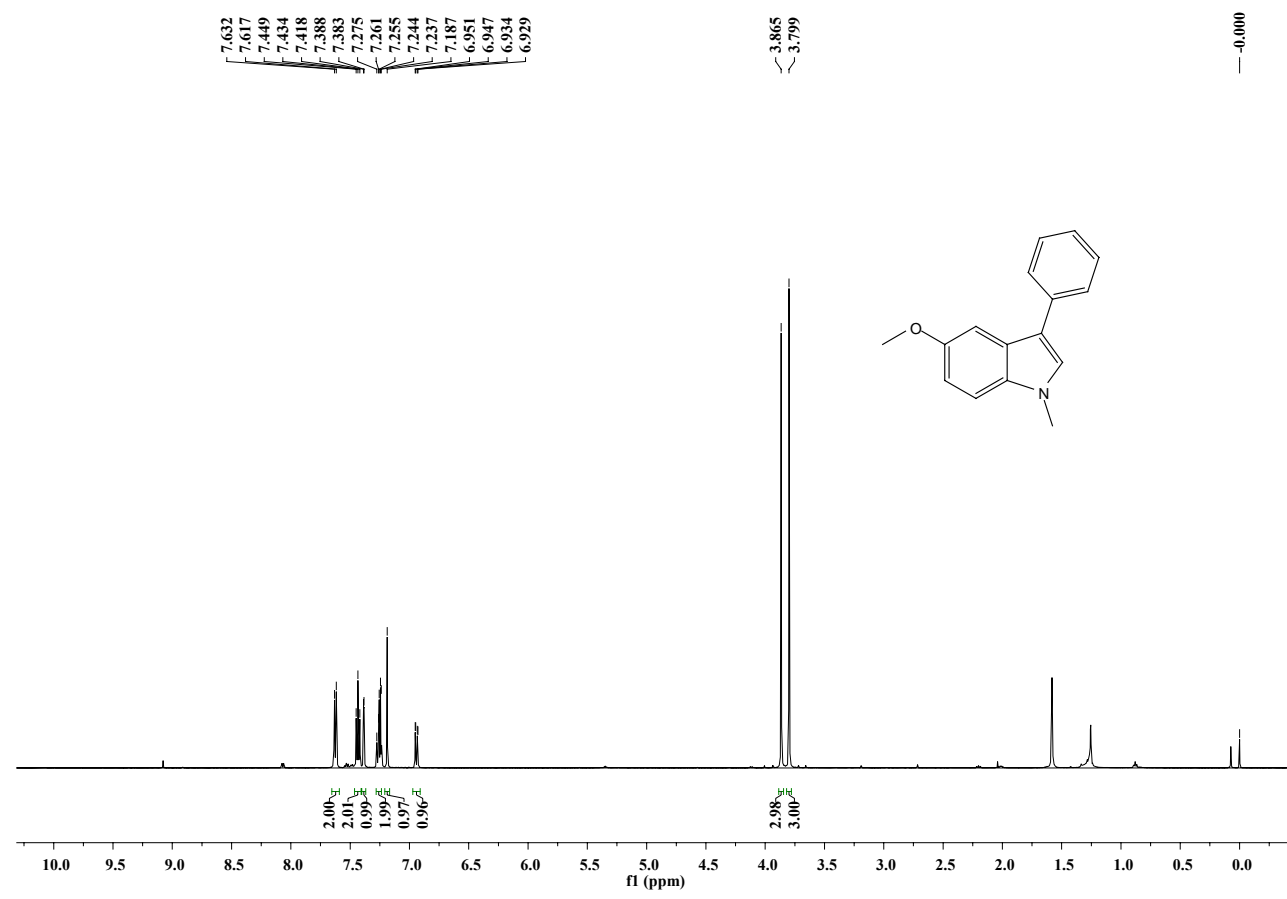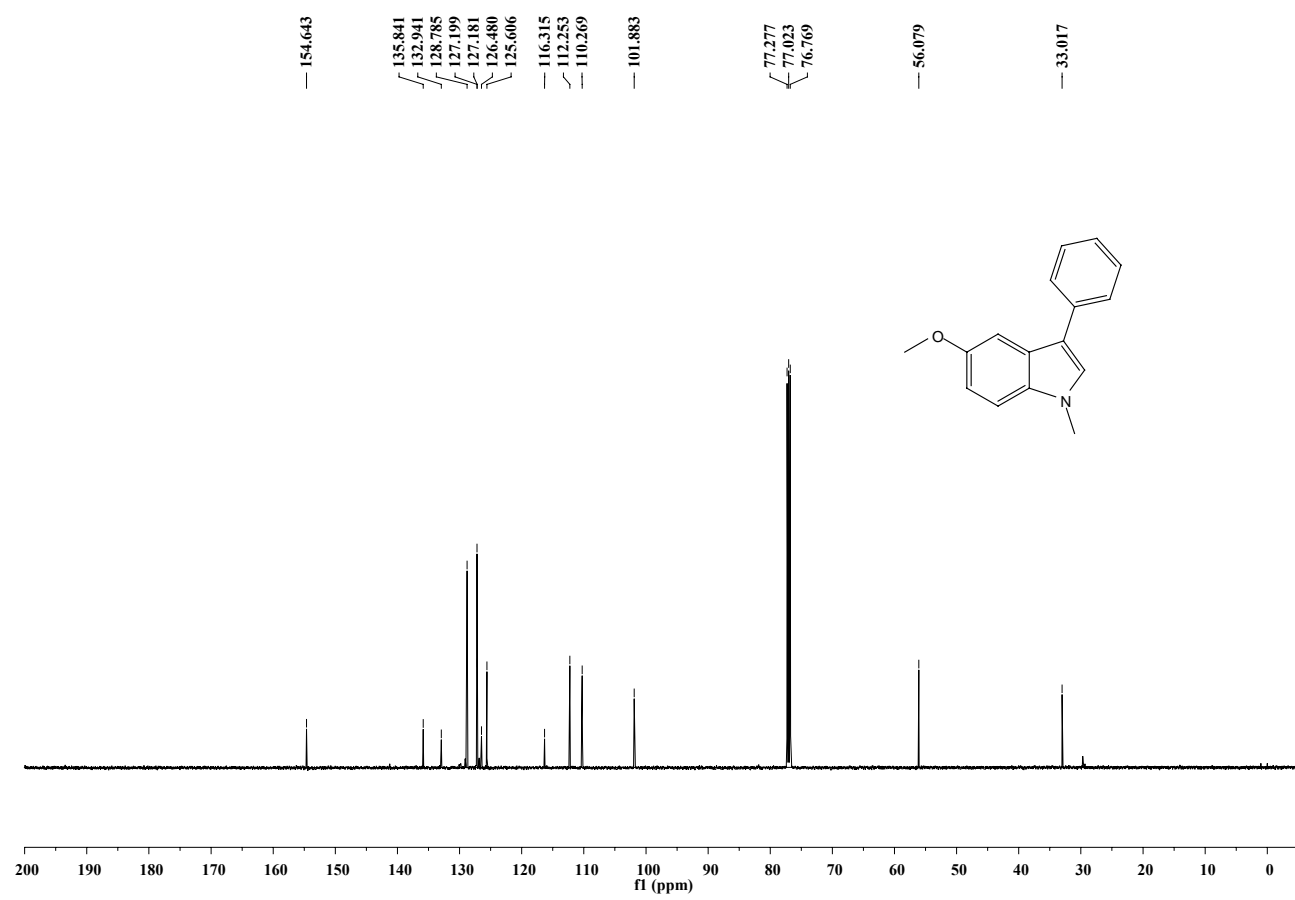

# 5-chloro-1-methyl-3-phenyl-1H-indole (4l)

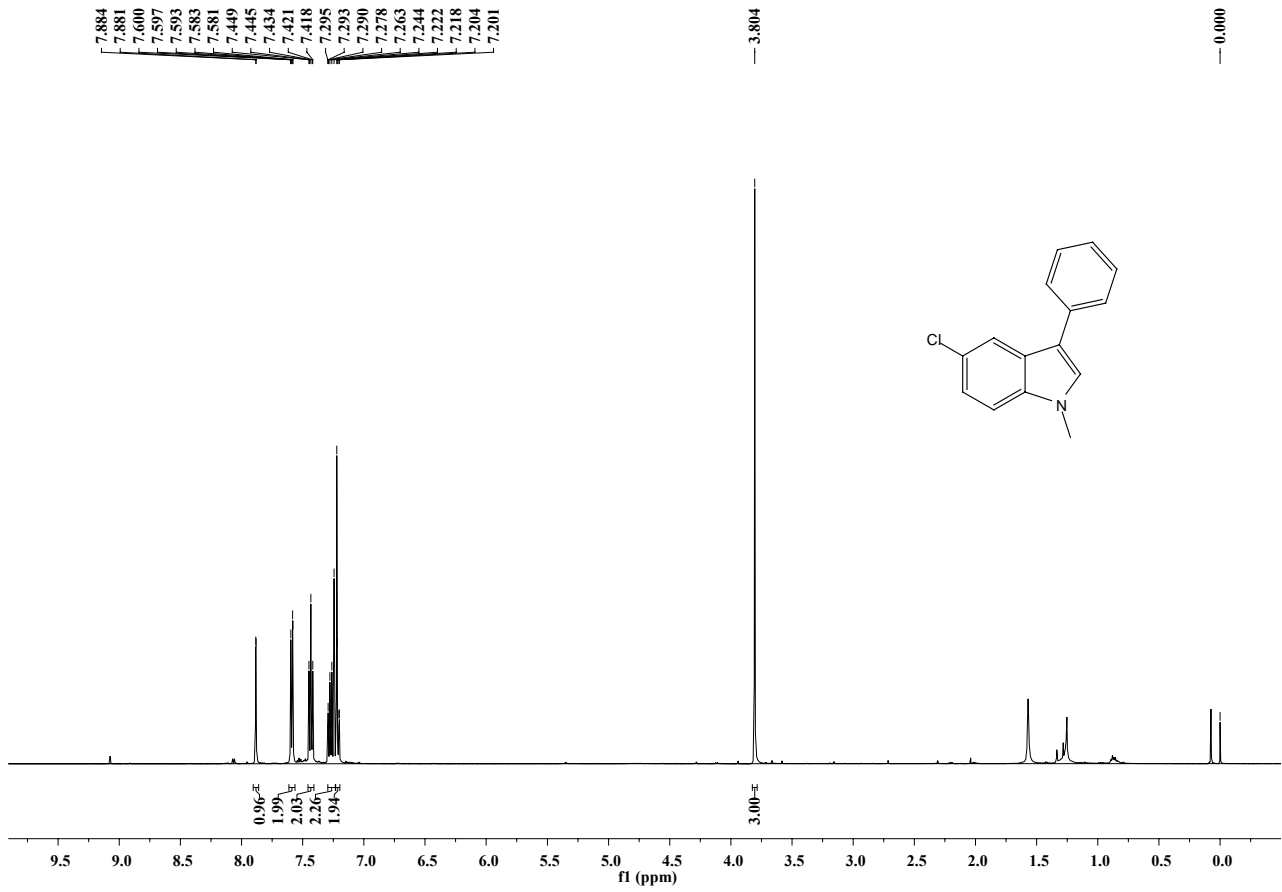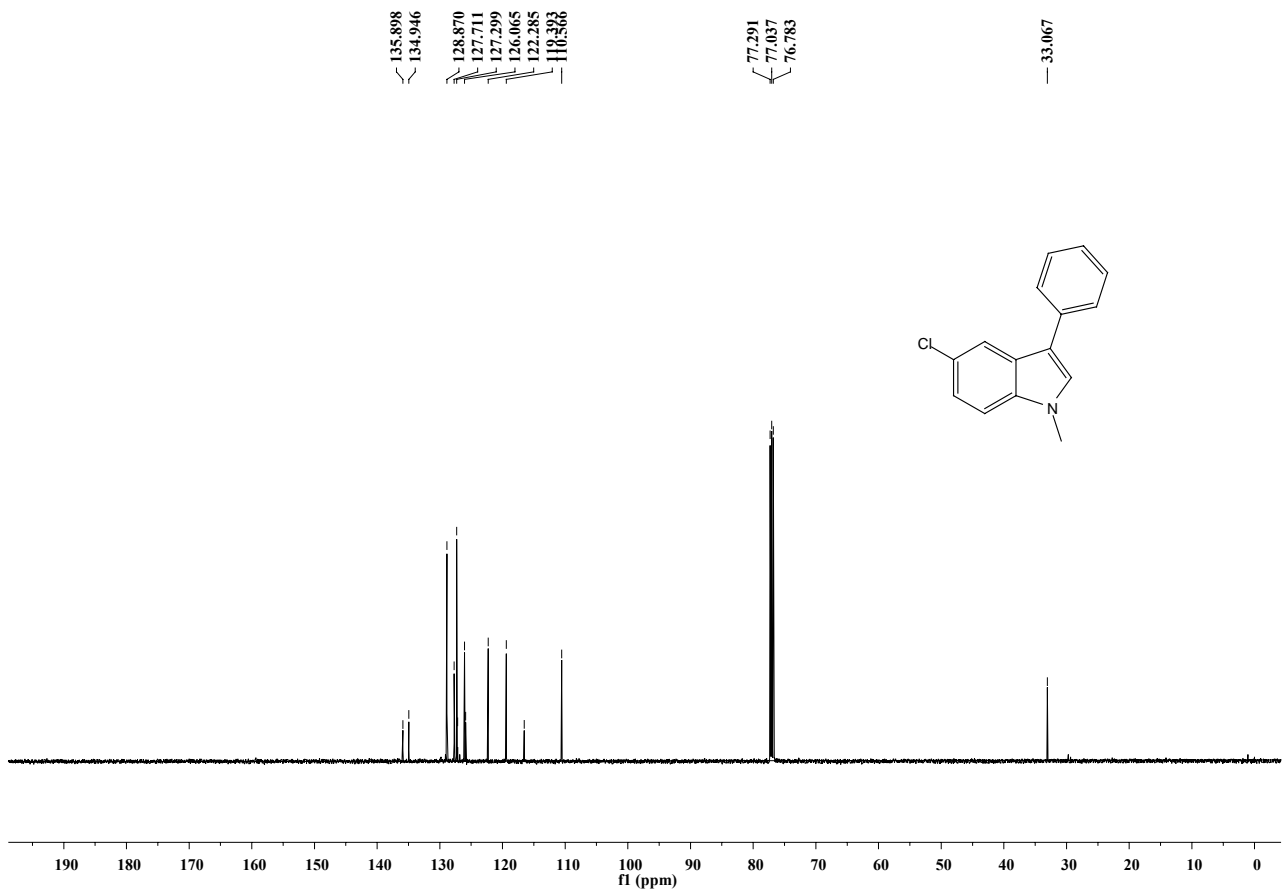

# 5-bromo-1-methyl-3-phenyl-1H-indole (4m)

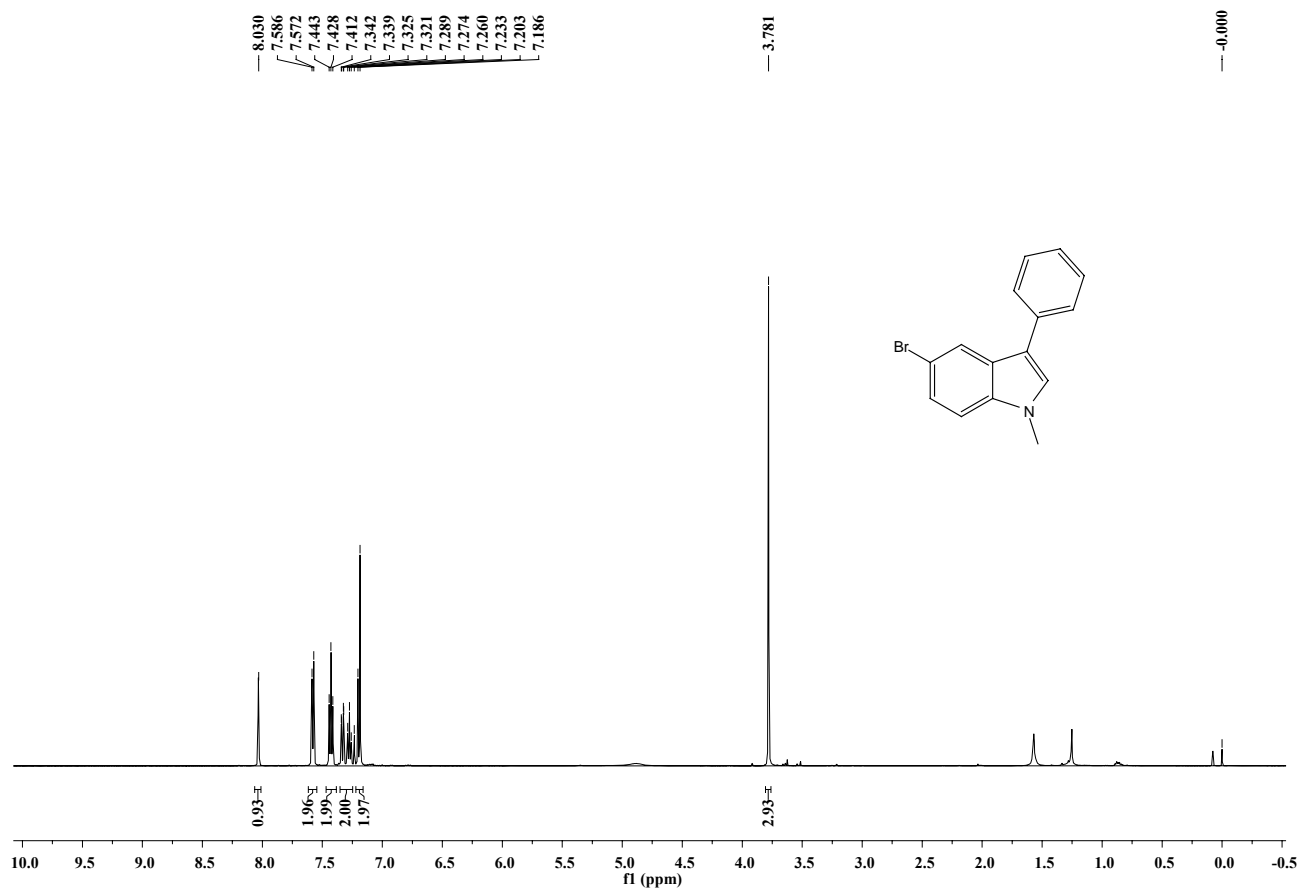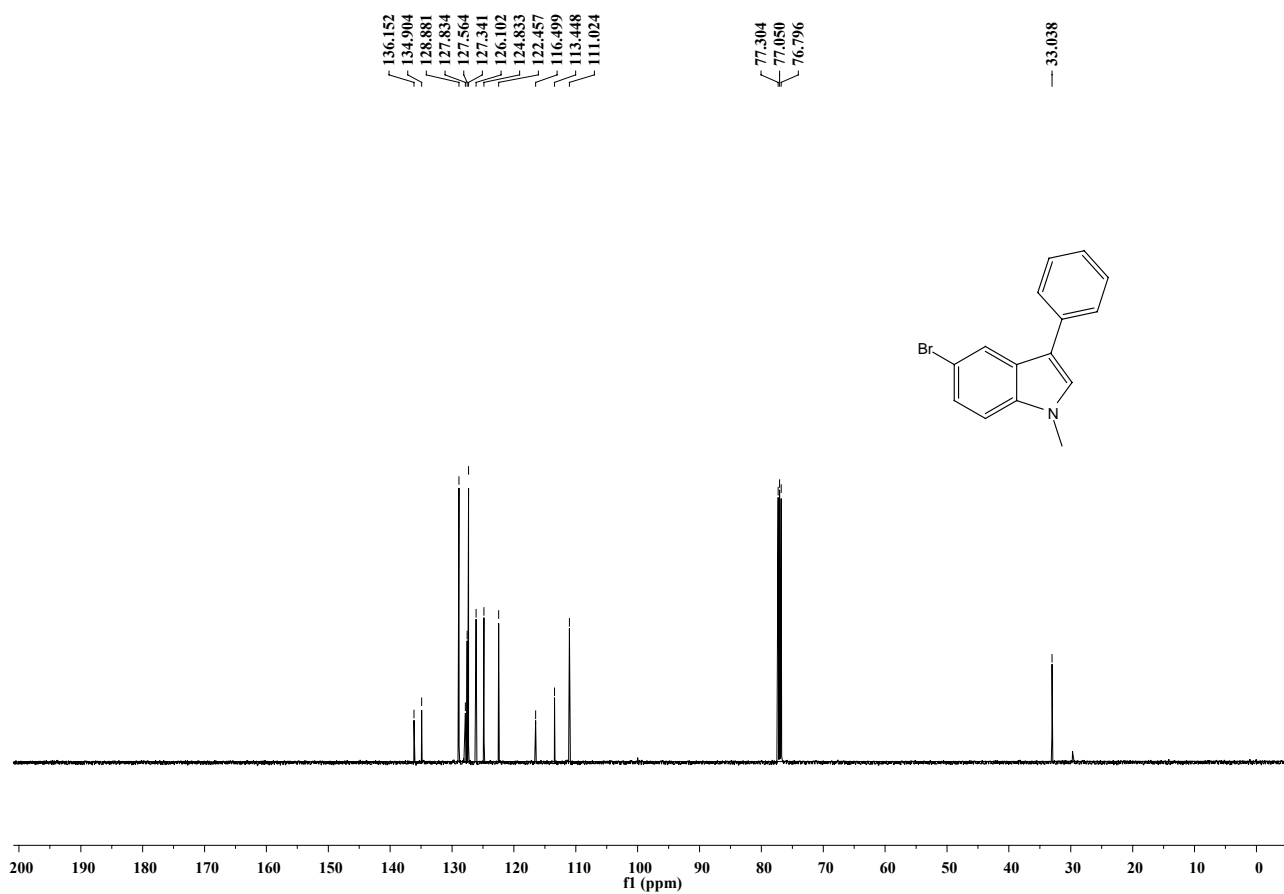

# Ethyl 2-(1,5-dimethyl-1H-indol-3-yl)acetate (4n)

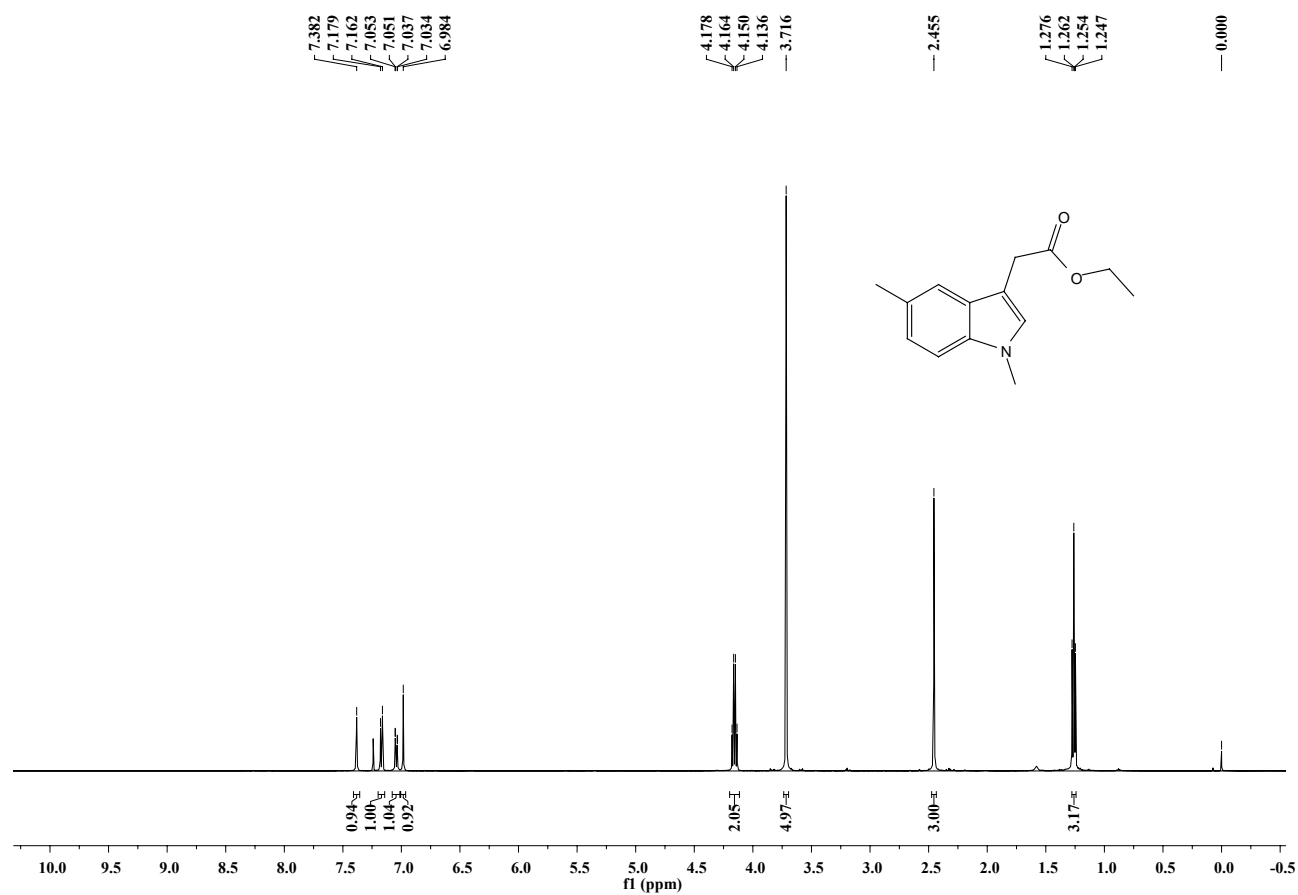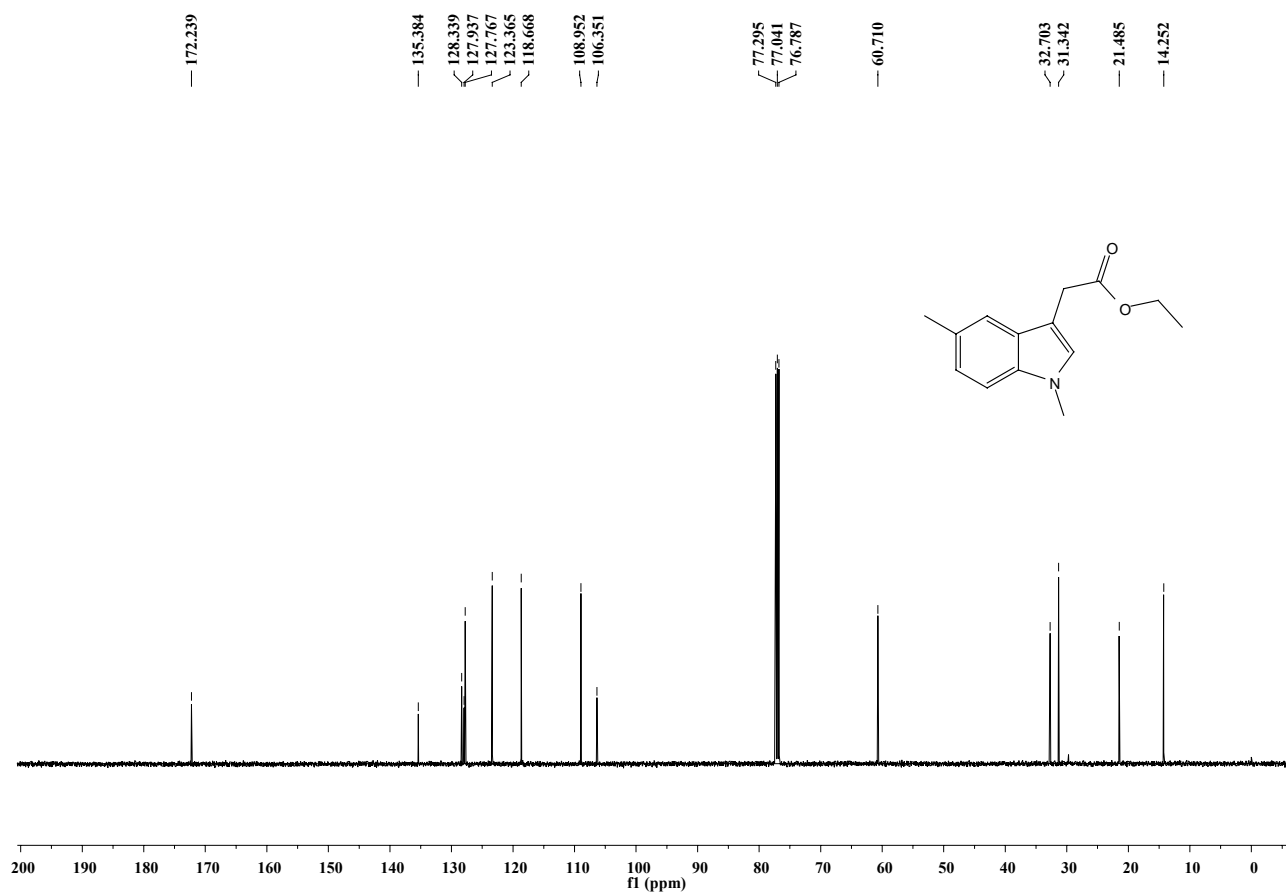

# 1-benzyl-3-phenyl-1H-indole (4o)

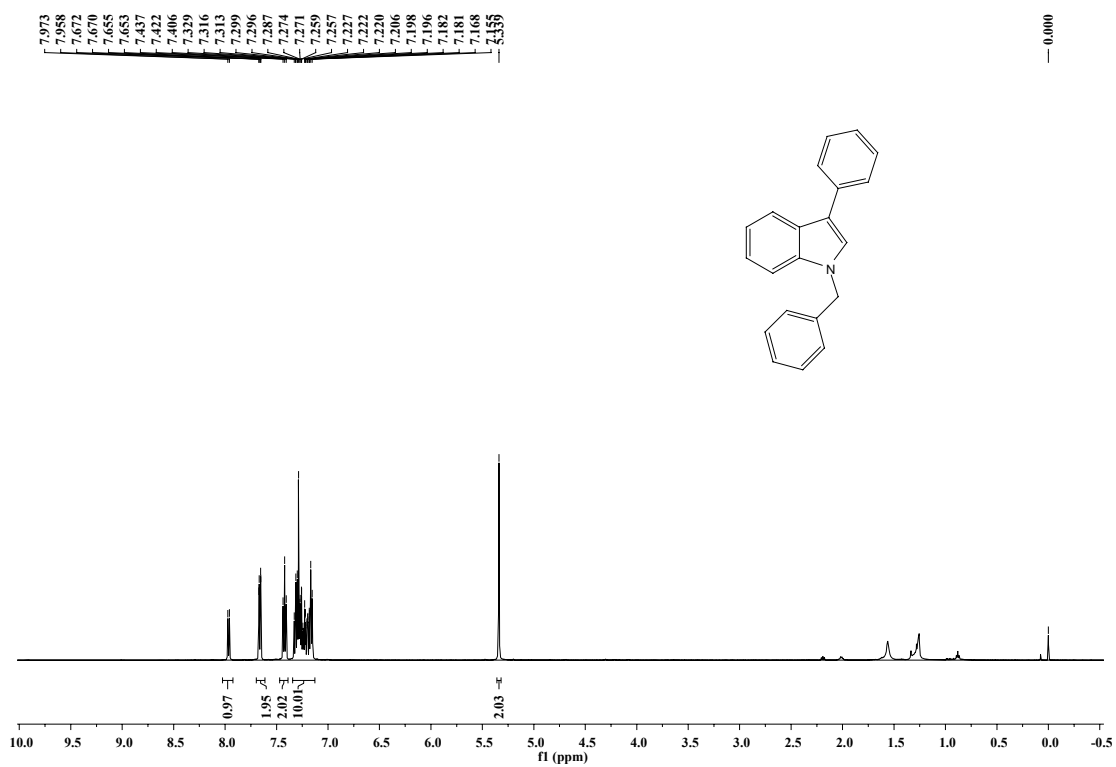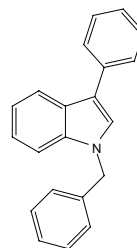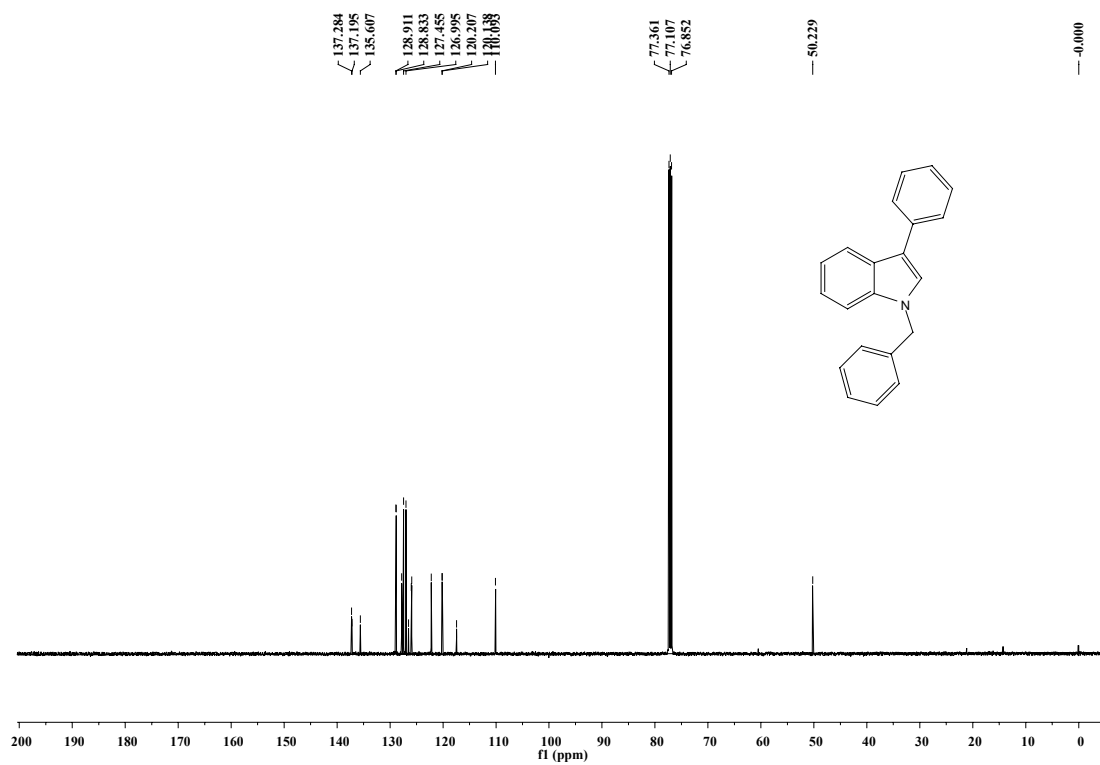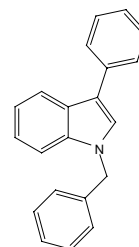

Supplement: c4ra11168k1.pdf [file c4ra11168k1.pdf]
